# Supplementary material for: Oral health manifestations and the perceived quality of life among Saudi children: a cross-sectional study
Source: PeerJ. 2024 Nov 19;12:e18556. doi: 10.7717/peerj.18556 (PMC11583907; doi:10.7717/peerj.18556)
Supplement: Supplemental Information 1 [file peerj-12-18556-s001.xlsx]

## Sheet: data for the Journal
SN	Children_bet_2_11	Consent	Consent_2	Region	City	Maternal_edu	Paternal_edu	M_edu_two_total	F_edu_two_total	Child_age	child_age_group	order_four_group	chil_order_five	Gender	health_child_teeth	child_toothache	child_oral_lesion	all_manifistation	pain_while_eating	Teeth_discolor	bad_odor	swollen_gums	abscess_cyst	dry_mouth	itchy_gums	bleeding_gums	tumor	Difficulty_speaking	difficulty_eating	ulcer	white_spots	roughness	burning_sensation	other_lesion	dental_visit	dentist_visit	reason_visit	child_satisfaction_yes	Notsatisfied_reverse_satisfied	child_smiling	Child_teeth_fun	difficulty_biting	difficulty_chewing	Yes_any_quality_no	Total_quality_ora_health	child_brush_frequency	Child_brush_yes	fluoride_toothpaste	Dental_floss
1657	1	2	1	4	4	4	4	2	2	3	1	1		1	3	2	1	1	2	1	2	2	2	2	2	2	2	2	2	2	2	2	2	1	2	1	2	3	3	2	2	2	2	1		1	1	1	2
1547	1	2	1	4	4	4	4	2	2	8	2	1	1	1	2	4	2		2	2	2	2	2	2	2	2	2	2	2	2	2	2	2	2	2	1	7	1	2	2	2	2	2	2	10	3	1	2	2
1535	1	2	1	4	4	4	4	2	2	5	1	1	1	2	1	4	2		2	2	2	2	2	2	2	2	2	2	2	2	2	2	2	2	2	1	7	1	2	2	2	2	2	2	10	2	1	1	2
1653	1	2	1	5	40	4	4	2	2	3	1	2		2	2	4	2		2	2	2	2	2	2	2	2	2	2	2	2	2	2	2	2	2	1	7	2	1	2	2	2	2	1	9	2	1	1	2
1718	1	2	1	4	4	3	4	1	2	2	1	2		1	2	4	2		2	2	2	2	2	2	2	2	2	2	2	2	2	2	2	2	2	1	7	1	2	2	2	3	2	1	11	2	1	2	2
1702	1	2	1	4	4	4	4	2	2	4	1	1		1	2	4	2	2	2	1	2	2	2	2	2	2	2	2	2	2	2	2	2	2	2	1	2	1	2	2	2	2	2	2	10	1	1	1	2
1561	1	2	1	4	4	4	4	2	2	3	1	2		1	1	4	2	2	2	2	2	2	2	2	2	2	2	2	2	2	2	2	2	2	2	1	7	1	2	2	2	2	2	2	10	1	1	1	2
1573	1	2	1	4	4	4	4	2	2	2	1	4		1	1	4	2	2	2	2	2	2	2	2	2	2	2	2	2	2	2	2	2	2	2	1	7	1	2	2	2	2	2	2	10	1	1	1	2
1694	1	2	1	3	7	4	3	2	1	6	2	3		1	3	3	1	1	1	2	1	1	2	2	2	2	2	2	2	2	2	2	2	2	2	1	2	1	2	2	2	2	2	2	10	2	1	2	2
1677	1	2	1	4	4	4	4	2	2	10	3	3		1	3	3	1	1	2	2	2	2	2	2	2	1	2	2	2	2	2	2	2	1	2	1	2	1	2	2	2	2	2	2	10	2	1	2	2
1594	1	2	1	4	4	3	3	1	1	8	2	3		2	3	3	1	1	2	1	1	2	2	2	2	1	2	2	2	2	2	2	2	2	2	1	4	1	2	2	2	2	2	2	10	1	1	1	2
1635	1	2	1	5	7	3	4	1	2	8	2	3		1	3	3	2		2	2	2	2	2	2	2	2	1	2	2	2	2	2	2	2	2	1	4	1	2	2	2	2	2	2	10	6	2	2	2
1585	1	2	1	4	4	4	4	2	2	5	1	1		2	2	3	2		2	2	2	2	2	2	2	2	2	2	2	2	2	2	2	2	2	1	7	1	2	2	2	2	2	2	10	2	1	1	2
1571	1	2	1	4	4	4	4	2	2	6	2	1		2	2	3	2		2	2	2	2	2	2	2	2	2	2	2	2	2	2	2	1	2	1	1	1	2	2	2	2	2	2	10	2	1	1	2
1663	1	2	1	1	4	3	3	1	1	4	1	2		1	1	3	2		2	2	2	2	2	2	2	2	2	2	2	2	2	2	2	2	2	1	7	1	2	2	2	2	2	2	10	2	1	2	2
1560	1	2	1	4	4	4	3	2	1	4	1	3		2	3	3	2		2	2	2	2	2	2	2	2	2	2	2	2	2	2	2	2	2	1	2	3	3	2	2	2	2	1		2	1	2	2
1617	1	2	1	5	4	3	3	1	1	7	2	3		2	1	3	2	2	1	1	1	2	2	2	2	2	2	2	2	2	2	2	2	2	2	1	7	1	2	2	2	2	2	2	10	1	1	1	2
1665	1	2	1	2	4	3	3	1	1	10	3	3		2	1	3	2	2	2	2	2	2	2	2	2	2	2	2	2	2	2	2	2	2	2	1	5	1	2	2	2	2	2	2	10	1	1	1	2
1607	1	2	1	4	11	4	4	2	2	4	1	4		2	1	3	2	2	2	2	2	2	2	2	2	2	2	2	2	2	2	2	2	2	2	1	2	1	2	2	2	2	2	2	10	1	1	2	2
1719	1	2	1	4	4	4	4	2	2	11	3	2		2	3	2	1		2	2	1	2	2	2	2	2	2	1	2	1	2	2	2	2	2	1	2	1	2	2	2	2	1	1	9	4	1	1	2
1572	1	2	1	5	4	4	2	2	1	10	3	4		1	3	2	1	1	1	1	1	2	2	2	2	2	2	2	2	2	2	2	2	2	2	1	1	3	3	2	2	2	2	1		3	1	1	2
1645	1	2	1	5	40	3	4	1	2	9	3	2		2	4	2	1	1	1	2	2	2	2	2	2	2	2	2	2	2	2	2	2	2	2	1	1	1	2	2	2	2	2	2	10	2	1	1	2
1652	1	2	1	4	6	3	2	1	1	11	3	2		1	3	2	1	1	2	2	2	2	1	2	2	2	2	2	2	2	1	2	2	2	2	1	4	2	1	2	2	1	1	1	7	2	1	1	2
1637	1	2	1	4	4	2	4	1	2	10	3	2		1	4	2	1	1	2	2	2	2	2	2	2	2	2	2	2	2	2	2	2	2	2	1	2	2	1	2	2	2	2	1	9	2	1	1	2
1666	1	2	1	4	4	4	2	2	1	5	1	3		1	3	2	1	1	2	1	2	2	2	2	2	2	2	2	2	2	2	2	2	2	2	1	7	1	2	2	2	2	2	2	10	1	1	1	2
1597	1	2	1	4	4	3	4	1	2	7	2	3		1	3	2	2		2	2	2	2	2	2	2	2	2	2	2	2	2	2	2	2	2	1	2	1	2	2	2	2	2	2	10	4	1	1	2
1630	1	2	1	4	4	2	4	1	2	7	2	3		1	3	2	2		2	2	2	2	2	2	2	2	2	2	2	2	2	2	2	2	2	1	2	1	2	2	2	2	2	2	10	2	1	1	2
1589	1	2	1	4	4	4	4	2	2	8	2	3		1	1	2	2		2	2	2	2	2	2	2	2	2	2	2	2	2	2	2	2	2	1	2	3	3	2	2	2	2	1		2	1	1	2
1567	1	2	1	4	4	4	4	2	2	10	3	3		2	1	2	2		2	2	2	2	2	2	2	2	2	2	2	2	2	2	2	2	2	1	1	1	2	2	2	2	2	2	10	2	1	2	2
1603	1	4	1	2	12	3	1	1	1	4	1	2		2	4	1	2		1	2	2	2	2	2	2	2	2	2	2	2	2	2	2	2	2	1	5	1	2	3	2	3	1	1	11	4	1	2	2
846	2	1	1	3	14	2	4	1	2	2	1	3	4	2	5	2	1	1	2	2	2	2	2	2	2	2	2	2	2	2	1	2	2	2	2	1	1	1	2	2	1	1	1	1	7	6	2	1	2
478	1	1	1	5	10	3	4	1	2	2	1	3	4	2	2	4	2	2	2	2	2	2	2	2	2	2	2	2	2	2	2	2	2	2	2	1	7	1	2	2	2	2	2	2	10	6	2	1	2
311	1	1	2	5	10	4	4	2	2	6	2	2	2	1	3	4	2	2	2	2	2	2	2	2	2	2	2	2	2	2	2	2	2	2	2	1	7	1	2	2	2	2	2	2	10	2	1	2	2
424	2	1	1	5	10	2	3	1	1	9	3	3	4	2	2	4	1	1	2	2	2	2	2	2	2	2	2	2	2	2	1	2	2	2	2	1	7	3	3	2	2	2	2	1		4	1	2	2
1274	1	2	1	5	10	4	4	2	2	10	3	2	2	1	3	4	1	1	2	2	2	2	2	2	2	2	2	2	2	2	2	2	2	1	2	1	7	1	2	2	2	2	2	2	10	3	1	2	2
285	1	1	1	1	36	4	4	2	2	3	1	2	2	1	2	4	1	1	1	2	1	2	2	2	2	2	2	2	1	2	1	2	2	2	2	1	2	1	2	2	2	2	2	2	10	2	1	1	2
913	1	1	1	4	7	4	4	2	2	5	1	2	2	2	3	4	1	1	2	1	2	2	2	2	2	2	2	2	2	2	1	2	2	2	2	1	7	1	2	2	2	2	2	2	10	2	1	1	2
895	1	1	1	5	10	4	4	2	2	6	2	3	4	1	2	4	1	1	2	1	1	2	2	2	2	2	2	2	2	2	2	2	2	2	2	1	7	1	2	2	2	2	2	2	10	2	1	1	2
508	1	1	1	4	7	4	4	2	2	7	2	1	1	1	3	4	1	1	2	1	1	2	2	2	2	2	2	2	2	2	2	2	2	2	2	1	7	1	2	2	2	2	2	2	10	2	1	2	2
1389	1	2	1	4	7	4	4	2	2	3	1	2	2	2	1	4	2	2	2	2	2	2	2	2	2	2	2	2	2	2	2	2	2	2	2	1	5	1	2	2	2	2	2	2	10	6	2	1	2
340	1	1	1	4	6	4	2	2	1	4	1	2	2	1	1	4	2	2	2	2	2	2	2	2	2	2	2	2	2	2	2	2	2	2	2	1	7	1	2	2	2	2	2	2	10	5	1	1	2
366	1	1	1	5	10	4	4	2	2	9	3	1	1	1	1	4	2	2	2	2	2	2	2	2	2	2	2	2	2	2	2	2	2	2	2	1	7	1	2	2	2	2	2	2	10	5	1	2	2
704	2	1	1	5	10	4	3	2	1	7	2	1	1	1	1	4	2	2	2	2	2	2	2	2	2	2	2	2	2	2	2	2	2	2	2	1	5	2	1	2	1	2	2	1	8	5	1	2	2
1221	1	2	1	3	2	3	3	1	1	8	2	2	3	1	1	4	2	2	2	2	2	2	2	2	2	2	2	2	2	2	2	2	2	2	2	1	7	1	2	3	2	2	2	1	11	5	1	2	2
483	1	1	1	5	10	4	4	2	2	4	1	3	4	1	1	4	2	2	2	2	2	2	2	2	2	2	2	2	2	2	2	2	2	2	2	1	7	1	2	2	2	2	2	2	10	3	1	1	2
1206	1	2	1	3	19	3	3	1	1	11	3	2	3	1	2	4	2	2	2	2	2	2	2	2	2	2	2	2	2	2	2	2	2	2	2	1	2	2	1	2	2	2	2	1	9	3	1	1	2
893	1	1	1	4	4	4	4	2	2	5	1	2	2	2	1	4	2	2	2	2	2	2	2	2	2	2	2	2	2	2	2	2	2	2	2	1	5	1	2	2	2	2	2	2	10	3	1	2	2
1002	1	1	1	4	6	4	3	2	1	3	1	4	5	1	1	4	2	2	2	2	2	2	2	2	2	2	2	2	2	2	2	2	2	2	2	1	7	1	2	2	2	2	2	2	10	3	1	2	2
1077	2	1	1	3	19	4	4	2	2	2	1	4	5	2	1	4	2	2	2	2	2	2	2	2	2	2	2	2	2	2	2	2	2	2	2	1	7	1	2	2	2	2	2	2	10	3	1	2	2
920	1	1	1	2	49	4	4	2	2	3	1	1	1	2	1	4	2	2	2	2	2	2	2	2	2	2	2	2	2	2	2	2	2	2	2	1	7	3	3	2	2	2	2	1		3	1	2	2
1167	1	2	1	5	10	4	3	2	1	3	1	1	1	1	2	4	2	2	2	2	2	2	2	2	2	2	2	2	2	2	2	2	2	2	2	1	7	1	2	2	2	2	2	2	10	3	1	2	2
1231	1	4	1	5	10	4	3	2	1	11	3	2	2	1	3	4	2	2	2	2	2	2	2	2	2	2	2	2	2	2	2	2	2	2	2	1	7	1	2	2	2	2	2	2	10	3	1	2	2
1528	1	2	1	1	52	4	3	2	1	11	3	3	4	2	1	4	2	2	2	2	2	2	2	2	2	2	2	2	2	2	2	2	2	2	2	1	7	3	3	2	2	2	2	1		3	1	2	2
66	1	1	1	4	4	4	4	2	2	4	1	1	1	1	1	4	2	1	2	2	2	2	2	2	2	2	2	2	2	2	2	2	2	1	2	1	7	1	2	2	2	2	2	2	10	2	1	1	1
76	1	1	1	4	4	4	4	2	2	5	1	1	1	2	2	4	2	1	2	2	2	2	2	2	2	2	2	2	2	2	2	2	2	1	2	1	7	1	2	2	2	2	2	2	10	2	1	1	2
690	1	1	1	5	10	4	4	2	2	4	1	2	3	1	1	4	2	2	2	2	2	2	2	2	2	2	2	2	2	2	2	2	2	2	2	1	7	1	2	2	2	2	2	2	10	2	1	1	2
121	1	1	1	4	4	4	4	2	2	5	1	2	2	1	1	4	2	2	2	2	2	2	2	2	2	2	2	2	2	2	2	2	2	2	2	1	7	1	2	2	2	2	2	2	10	2	1	1	2
656	2	1	1	2	10	4	4	2	2	3	1	4	5	1	2	4	2	2	2	2	2	2	2	2	2	2	2	2	2	2	2	2	2	2	2	1	6	1	2	2	2	2	2	2	10	2	1	1	2
461	2	1	1	5	10	4	4	2	2	4	1	2	2	1	1	4	2	2	2	2	2	2	2	2	2	2	2	2	2	2	2	2	2	2	2	1	7	1	2	2	2	2	2	2	10	2	1	1	2
11	1	1	1	4	4	4	4	2	2	8	2	3	4	2	2	4	2	1	2	2	2	2	2	2	2	2	2	2	2	1	2	2	2	2	2	1	7	1	2	2	2	2	2	2	10	2	1	1	2
548	1	1	1	5	40	4	4	2	2	11	3	1	1	2	1	4	2	2	2	2	2	2	2	2	2	2	2	2	2	2	2	2	2	2	2	1	7	1	2	1	2	2	2	1	9	2	1	1	2
696	2	1	1	4	4	4	4	2	2	2	1	4	5	2	1	4	2	2	2	2	2	2	2	2	2	2	2	2	2	2	2	2	2	2	2	1	7	3	3	3	3	2	3	1		2	1	1	2
1520	1	2	1	1	1	4	4	2	2	6	2	1	1	2	1	4	2	2	2	2	2	2	2	2	2	2	2	2	2	2	2	2	2	2	2	1	7	1	2	2	2	2	2	2	10	2	1	1	2
202	1	1	2	1	36	3	3	1	1	2	1	3	4	1	3	4	2	1	2	1	2	2	2	2	2	2	2	2	2	2	2	2	2	2	2	1	7	1	2	2	2	2	2	2	10	2	1	2	2
417	1	1	1	2	10	4	4	2	2	7	2	1	1	2	2	4	2	1	2	2	1	2	2	2	2	2	2	2	2	2	2	2	2	2	2	1	7	1	2	2	2	2	2	2	10	2	1	2	2
279	1	1	1	5	10	3	3	1	1	7	2	2	3	2	1	4	2	2	2	2	2	2	2	2	2	2	2	2	2	2	2	2	2	2	2	1	7	1	2	2	2	2	2	2	10	2	1	2	2
152	1	1	1	4	4	4	3	2	1	7	2	2	2	1	1	4	2	2	2	2	2	2	2	2	2	2	2	2	2	2	2	2	2	2	2	1	7	1	2	2	2	2	2	2	10	2	1	2	2
1009	1	1	1	4	6	4	3	2	1	6	2	3	4	2	2	4	2	2	2	2	2	2	2	2	2	2	2	2	2	2	2	2	2	2	2	1	7	1	2	2	2	2	2	2	10	2	1	2	2
1222	1	2	1	4	4	4	4	2	2	5	1	4	5	1	2	4	2	2	2	2	2	2	2	2	2	2	2	2	2	2	2	2	2	2	2	1	2	1	2	2	2	2	2	2	10	2	1	2	2
1000	1	1	1	5	10	1	4	1	2	11	3	3	4	2	1	4	2	2	2	2	2	2	2	2	2	2	2	2	2	2	2	2	2	2	2	1	7	2	1	3	2	2	2	1	10	2	1	2	2
1321	1	2	1	2	49	3	4	1	2	9	3	3	4	1	1	4	2	2	2	2	2	2	2	2	2	2	2	2	2	2	2	2	2	2	2	1	5	1	2	1	2	2	2	1	9	2	1	2	2
460	2	1	1	2	10	1	1	1	1	6	2	3	4	1	3	4	2	2	2	2	2	2	2	2	2	2	2	2	2	2	2	2	2	2	2	1	3	1	2	2	2	1	2	1	9	2	1	2	2
28	1	3	1	3	5	4	4	2	2	5	1	4	5	2	1	4	2	1	2	2	2	2	2	2	2	2	2	2	2	2	2	2	2	1	2	1	7	3	3	2	2	2	2	1		2	1	2	2
71	1	3	1	3	5	4	4	2	2	5	1	4	5	2	1	4	2	1	2	2	2	2	2	2	2	2	2	2	2	2	2	2	2	1	2	1	7	3	3	2	2	2	2	1		2	1	2	2
1286	1	2	1	4	4	4	4	2	2	9	3	3	4	2	1	4	2	2	2	2	2	2	2	2	2	2	2	2	2	2	2	2	2	2	2	1	5	1	2	2	2	2	2	2	10	2	1	2	2
1322	1	2	1	5	10	4	4	2	2	5	1	1	1	2	1	4	2	2	2	2	2	2	2	2	2	2	2	2	2	2	2	2	2	2	2	1	2	1	2	2	2	2	2	2	10	2	1	2	2
1138	1	2	1	1	52	3	4	1	2	5	1	2	2	1	1	4	2	2	2	2	2	2	2	2	2	2	2	2	2	2	2	2	2	2	2	1	7	1	2	2	2	2	2	2	10	2	1	2	2
1307	1	2	1	5	10	4	4	2	2	4	1	2	3	2	2	4	2	2	2	2	2	2	2	2	2	2	2	2	2	2	2	2	2	2	2	1	7	1	2	2	2	2	2	2	10	2	1	2	2
1360	1	2	1	5	10	4	4	2	2	2	1	4	5	2	3	4	2	2	2	2	2	2	2	2	2	2	2	2	2	2	2	2	2	2	2	1	7	1	2	2	2	2	2	2	10	1	1	1	1
1353	1	2	1	5	10	2	3	1	1	3	1	2	3	1	3	4	2	2	2	2	2	2	2	2	2	2	2	2	2	2	2	2	2	2	2	1	7	1	2	2	2	2	2	2	10	1	1	1	2
162	1	1	1	1	1	3	4	1	2	11	3	2	2	1	1	4	2	1	2	2	2	2	2	2	2	2	2	2	2	2	2	2	2	1	2	1	3	1	2	2	2	2	2	2	10	1	1	1	2
631	1	1	1	4	4	4	4	2	2	3	1	1	1	2	2	4	2	2	2	2	2	2	2	2	2	2	2	2	2	2	2	2	2	2	2	1	2	1	2	2	2	2	2	2	10	1	1	1	2
924	1	1	1	3	2	4	4	2	2	3	1	1	1	2	3	4	2	2	2	2	2	2	2	2	2	2	2	2	2	2	2	2	2	2	2	1	2	1	2	2	2	2	2	2	10	1	1	1	2
796	1	1	1	5	10	4	4	2	2	5	1	1	1	1	2	4	2	2	2	2	2	2	2	2	2	2	2	2	2	2	2	2	2	2	2	1	7	1	2	2	2	2	2	2	10	1	1	1	2
156	1	1	1	1	1	3	4	1	2	11	3	1	1	1	2	4	2	1	2	2	2	2	2	2	2	2	2	2	2	2	2	2	2	1	2	1	3	1	2	2	2	2	2	2	10	1	1	1	2
175	1	1	1	5	10	4	4	2	2	10	3	1	1	1	2	4	2	1	2	1	2	2	2	2	2	2	2	2	2	2	2	2	2	2	2	1	7	1	2	2	2	2	2	2	10	1	1	1	2
133	1	1	1	4	4	4	4	2	2	11	3	2	2	1	2	4	2	1	2	2	2	2	2	2	2	2	2	2	2	2	2	2	2	1	2	1	7	1	2	2	2	2	2	2	10	1	1	1	2
712	2	1	1	1		2	3	1	1	9	3	3	4	1	3	4	2	1	2	2	2	2	2	2	2	2	2	2	2	2	2	2	2	1	2	1	2	1	2	2	2	2	2	2	10	1	1	1	2
342	1	1	1	5	10	4	4	2	2	5	1	4	5	1	1	4	2	2	2	2	2	2	2	2	2	2	2	2	2	2	2	2	2	2	2	1	7	1	2	2	2	2	2	2	10	1	1	1	2
980	1	1	1	5	24	3	3	1	1	8	2	1	1	2	1	4	2	2	2	2	2	2	2	2	2	2	2	2	2	2	2	2	2	2	2	1		1	2	2	2	2	2	2	10	1	1	2	2
479	1	1	1	3	2	4	4	2	2	3	1	1	1	2	3	4	2	2	2	2	2	2	2	2	2	2	2	2	2	2	2	2	2	2	2	1	2	1	2	2	2	2	2	2	10	1	1	2	2
20	1	1	1	4	4	4	4	2	2	11	3	2	2	1	2	4	2	1	2	2	2	2	2	2	2	2	2	2	2	2	2	2	2	1	2	1	7	1	2	2	2	2	2	2	10	1	1	2	2
599	1	1	1	5	10	3	3	1	1	4	1	3	4	1	1	4	2	2	2	2	2	2	2	2	2	2	2	2	2	2	2	2	2	2	2	1	7	1	2	2	2	2	2	2	10	1	1	2	2
660	1	1	1	4	7	4	4	2	2	6	2	1	1	2	2	4	2	2	2	2	2	2	2	2	2	2	2	2	2	2	2	2	2	2	2	1	7	3	3	2	2	2	2	1		1	1	2	2
586	1	3	1	1	1	4	4	2	2	4	1	4	5	1	1	4	2	2	2	2	2	2	2	2	2	2	2	2	2	2	2	2	2	2	2	1	7	1	2	2	2	2	2	2	10	1	1	2	2
806	1	1	1	4	4	3	3	1	1	11	3	3	4	1	2	4	2	2	2	2	2	2	2	2	2	2	2	2	2	2	2	2	2	2	2	1	2	1	2	2	2	2	2	2	10	1	1	2	2
775	1	1	1	2		1	2	1	1	3	1	1	1	1	1	3	1	2	2	2	2	2	2	2	2	2	2	2	2	2	2	2	2	2	2	1	1	1	2	2	2	2	2	2	10	6	2	1	1
661	1	1	1	2	55	4	4	2	2	10	3	3	4	2	2	3	1	1	2	2	2	2	2	2	2	2	2	2	2	2	2	2	2	1	2	1	7	1	2	2	2	2	2	2	10	6	2	2	1
606	1	1	1	5	10	4	4	2	2	10	3	2	3	2	3	3	1	1	1	2	2	2	2	2	2	2	2	2	2	2	2	2	2	2	2	1	7	1	2	2	2	2	2	2	10	6	2	2	2
1300	1	2	1	5	10	3	4	1	2	11	3	3	4	2	2	3	1	1	2	2	1	2	2	2	2	2	2	2	2	2	1	2	2	2	2	1	1	2	1	2	2	2	2	1	9	5	1	1	2
271	1	3	1	1	52	3	3	1	1	11	3	3	4	2	3	3	1	1	1	2	1	2	2	2	2	2	2	2	2	2	1	2	2	2	2	1	1	2	1	2	2	2	2	1	9	4	1	1	2
642	1	1	1	5	10	2	3	1	1	10	3	2	3	1	2	3	1	1	1	2	2	2	2	2	2	2	2	2	2	2	2	2	2	2	2	1	1	3	3	2	2	2	2	1		4	1	1	2
740	1	1	1	1		2	3	1	1	10	3	3	4	1	3	3	1	1	2	2	2	2	2	2	2	2	2	2	2	2	1	2	2	2	2	1	2	2	1	2	2	3	3	1	11	4	1	2	2
102	1	1	1	4	7	3	4	1	2	5	1	4	5	1	3	3	1	1	2	2	1	2	2	2	2	2	2	2	2	2	2	2	2	2	2	1	2	3	3	2	2	1	1	1		4	1	2	2
103	1	1	1	4	7	3	4	1	2	5	1	4	5	1	3	3	1	1	2	2	1	2	2	2	2	2	2	2	2	2	2	2	2	2	2	1	2	3	3	2	2	1	1	1		4	1	2	2
299	1	1	1	4	7	3	4	1	2	5	1	4	5	1	3	3	1	1	2	2	1	2	2	2	2	2	2	2	2	2	2	2	2	2	2	1	2	3	3	2	2	1	1	1		4	1	2	2
1299	1	2	1	5	10	2	2	1	1	4	1	3	4	1	1	3	1	2	2	2	2	2	2	2	2	2	2	2	2	2	2	2	2	2	2	1	7	1	2	1	2	2	2	1	9	4	1	2	2
1192	1	2	1	1	48	3	4	1	2	7	2	3	4	2	3	3	1	1	2	2	2	1	2	2	2	2	2	2	2	2	2	2	2	2	2	1	2	2	1	2	2	2	2	1	9	3	1	1	2
298	1	1	1	1	46	4	4	2	2	7	2	2	3	1	2	3	1	2	2	2	2	2	2	2	2	2	2	2	2	2	2	2	2	2	2	1	1	3	3	2	2	2	2	1		3	1	2	2
500	1	1	1	2	10	4	3	2	1	3	1	1	1	2	1	3	1	1	1	2	1	2	2	2	2	2	2	2	2	2	2	2	2	2	2	1	1	1	2	2	2	2	2	2	10	3	1	2	2
1465	1	2	1	1	52	4	4	2	2	8	2	3	4	1	2	3	1	1	2	2	2	2	2	2	2	2	2	2	2	2	2	2	2	1	2	1	2	1	2	2	2	2	2	2	10	3	1	2	2
1159	1	2	1	1	1	4	4	2	2	5	1	1	1	2	2	3	1	1	2	1	2	2	2	2	2	2	2	2	2	2	2	2	2	2	2	1	2	1	2	1	2	2	2	1	9	3	1	2	2
98	1	1	1	4	4	4	4	2	2	4	1	2	3	1	3	3	1	1	1	2	2	2	2	2	2	2	2	2	2	2	2	2	2	2	2	1	1	1	2	2	2	2	2	2	10	2	1	1	2
163	1	1	1	2	7	4	4	2	2	5	1	3	4	2	5	3	1	1	2	1	2	2	2	2	2	2	2	2	2	2	2	2	2	2	2	1	3	1	2	1	2	1	1	1	7	2	1	1	2
732	1	1	1	4		4	2	2	1	9	3	1	1	1	3	3	1	1	2	2	2	2	2	2	2	2	2	2	2	2	2	2	2	1	2	1	2	1	2	2	2	2	2	2	10	2	1	1	2
292	1	1	1	5	10	4	4	2	2	4	1	1	1	2	2	3	1	1	1	2	2	2	2	2	2	2	2	2	2	2	2	2	2	2	2	1	7	1	2	2	2	2	2	2	10	2	1	1	2
164	1	1	1	1	1	4	4	2	2	6	2	3	4	2	1	3	1	1	2	2	2	2	2	2	2	2	2	2	2	2	2	2	2	1	2	1	7	1	2	2	2	2	2	2	10	2	1	1	2
151	1	1	1	4	4	4	3	2	1	10	3	1	1	1	1	3	1	1	1	1	2	2	2	2	2	2	2	2	2	2	2	2	2	2	2	1	1	1	2	2	2	2	2	2	10	2	1	1	2
39	1	1	1	4	12	4	4	2	2	4	1	2	2	1	1	3	1	1	1	2	2	2	2	2	2	2	2	2	2	2	2	2	2	2	2	1	1	1	2	2	2	2	2	2	10	2	1	1	2
134	1	1	1	4	4	4	4	2	2	4	1	2	3	1	3	3	1	1	1	2	2	2	2	2	2	2	2	2	2	2	2	2	2	2	2	1	1	1	2	2	2	2	2	2	10	2	1	1	2
1387	1	1	1	2	7	4	4	2	2	5	1	3	4	2	5	3	1	1	2	1	2	2	2	2	2	2	2	2	2	2	2	2	2	2	2	1	3	1	2	1	2	1	1	1	7	2	1	1	2
79	1	1	1	4	4	4	4	2	2	4	1	2	3	1	3	3	1	1	1	2	2	2	2	2	2	2	2	2	2	2	2	2	2	2	2	1	1	1	2	2	2	2	2	2	10	2	1	1	2
1153	1	2	1	1	1	4	4	2	2	7	2	2	3	2	2	3	1	1	1	2	2	2	2	2	2	2	2	2	2	2	2	2	2	2	2	1	1	1	2	2	2	2	2	2	10	2	1	2	1
322	1	1	1	5	10	4	4	2	2	4	1	1	1	2	2	3	1	1	1	2	2	2	2	2	2	2	2	2	2	2	2	2	2	2	2	1	7	1	2	2	2	2	2	2	10	2	1	2	2
10	1	1	1	4	4	4	4	2	2	9	3	1	1	1	2	3	1	1	1	2	2	2	2	2	2	2	2	2	2	2	2	2	2	2	2	1	2	1	2	2	2	2	2	2	10	2	1	2	2
256	1	1	1	4	4	4	3	2	1	8	2	3	4	2	3	3	1	1	2	2	2	2	2	2	2	2	2	2	1	2	2	2	2	2	2	1	1	1	2	2	2	2	2	2	10	2	1	2	2
776	2	1	1	5		1	3	1	1	10	3	3	4	2	1	3	1	1	2	2	2	2	2	2	2	2	2	2	2	2	1	2	2	2	2	1	6	1	2	2	2	2	2	2	10	2	1	2	2
374	1	1	1	1	1	4	4	2	2	6	2	3	4	2	1	3	1	1	2	2	2	2	2	2	2	2	2	2	2	2	2	2	2	1	2	1	7	1	2	2	2	2	2	2	10	2	1	2	2
871	1	1	1	1	31	4	4	2	2	10	3	2	2	1	3	3	1	1	2	1	2	2	2	2	2	2	2	2	2	2	1	2	2	2	2	1	2	2	1	2	2	2	2	1	9	2	1	2	2
289	1	1	1	1	36	4	4	2	2	11	3	2	3	2	2	3	1	1	2	2	2	2	2	2	2	2	2	2	2	2	2	2	2	1	2	1	2	2	1	2	2	2	2	1	9	2	1	2	2
290	1	1	1	4	4	4	3	2	1	11	3	2	3	1	3	3	1	1	2	2	2	2	2	2	2	2	2	2	2	2	1	2	2	2	2	1	4	2	1	2	2	3	3	1	11	2	1	2	2
155	1	1	1	1	63	3	4	1	2	11	3	2	2	2	3	3	1	2	2	2	2	2	2	2	2	2	2	2	2	2	2	2	2	2	2	1	7	3	3	1	2	2	2	1		2	1	2	2
1518	1	2	1	5	20	4	2	2	1	7	2	2	2	2	3	3	1	1	1	2	2	2	1	2	2	1	2	2	2	2	2	2	2	2	2	1	7	3	3	2	2	2	2	1		2	1	2	2
555	1	1	1	5	10	4	4	2	2	10	3	3	4	1	3	3	1	1	2	1	1	2	2	2	2	2	2	2	2	1	2	2	2	2	2	1	6	2	1	2	2	2	2	1	9	2	1	2	2
1347	1	2	1	3	5	2	4	1	2	11	3	3	4	2	2	3	1	1	2	1	2	2	2	2	2	2	2	2	2	2	2	2	2	2	2	1	7	1	2	2	2	2	2	2	10	1	1	1	1
229	1	1	1	4	4	4	4	2	2	10	3	2	3	2	1	3	1	1	2	2	2	2	2	2	2	2	2	2	2	2	2	2	2	1	2	1	7	3	3	2	2	2	2	1		1	1	1	1
391	2	1	1	5	10	4	4	2	2	11	3	3	4	1	3	3	1	1	2	2	2	2	2	2	2	2	2	2	2	2	2	2	2	1	2	1	5	3	3	2	2	2	2	1		1	1	1	1
1102	1	1	1	2	49	1	3	1	1	11	3	3	4	1	2	3	1	1	2	2	1	2	2	2	2	2	2	2	2	2	2	2	2	2	2	1	1	1	2	2	2	2	2	2	10	1	1	1	2
57	1	1	1	4	7	2	3	1	1	6	2	3	4	1	1	3	1	1	2	2	2	1	2	2	2	2	2	2	2	2	2	2	2	2	2	1	7	1	2	2	2	2	2	2	10	1	1	1	2
230	1	1	1	4	4	4	4	2	2	8	2	3	4	1	2	3	1	1	2	2	1	2	2	2	2	2	2	2	2	2	2	2	2	2	2	1	7	1	2	2	2	2	2	2	10	1	1	1	2
265	1	1	1	4	4	4	4	2	2	8	2	3	4	1	2	3	1	1	2	2	1	2	2	2	2	2	2	2	2	2	2	2	2	2	2	1	7	1	2	2	2	2	2	2	10	1	1	2	1
878	1	1	1	5	10	4	4	2	2	5	1	2	3	2	2	3	1	1	2	2	2	2	2	2	2	2	2	2	2	2	1	2	2	1	2	1	2	1	2	2	2	2	2	2	10	1	1	2	2
18	1	1	1	1	4	4	4	2	2	11	3	3	4	1	1	3	1	1	2	2	2	2	2	2	2	2	2	2	2	2	2	2	2	1	2	1	3	1	2	2	2	2	2	2	10	1	1	2	2
247	1	1	1	4	4	4	4	2	2	8	2	3	4	1	2	3	1	1	2	2	1	2	2	2	2	2	2	2	2	2	2	2	2	2	2	1	7	1	2	2	2	2	2	2	10	1	1	2	2
885	1	1	1	5	10	4	3	2	1	7	2	3	4	1	3	3	2	2	2	2	2	2	2	2	2	2	2	2	2	2	2	2	2	2	2	1		1	2	2	2	2	2	2	10	6	2	1	2
753	1	1	1	5		4	3	2	1	2	1	4	5	2	2	3	2	2	2	2	2	2	2	2	2	2	2	2	2	2	2	2	2	2	2	1	7	3	3	2	2	2	2	1		6	2	1	2
610	1	1	1	5	10	4	4	2	2	4	1	2	2	1	2	3	2	2	2	2	2	2	2	2	2	2	2	2	2	2	2	2	2	2	2	1	1	1	2	2	2	2	2	2	10	6	2	2	2
1023	1	1	1	5	10	4	4	2	2	7	2	2	2	2	1	3	2	2	2	2	2	2	2	2	2	2	2	2	2	2	2	2	2	2	2	1	1	1	2	2	2	2	2	2	10	5	1	1	2
64	1	1	1	4	4	3	4	1	2	11	3	1	1	1	3	3	2	1	1	2	2	2	2	2	2	2	2	2	2	2	2	2	2	2	2	1	2	2	1	2	2	2	2	1	9	5	1	1	2
569	1	1	1	5	10	4	4	2	2	4	1	3	4	2	1	3	2	2	2	2	2	2	2	2	2	2	2	2	2	2	2	2	2	2	2	1	7	1	2	2	2	2	2	2	10	5	1	2	2
982	1	1	1	2	29	4	4	2	2	2	1	4	5	1	2	3	2	1	2	2	2	2	2	2	2	2	2	2	2	2	1	2	2	1	2	1	7	1	2	2	2	2	2	2	10	5	1	2	2
94	1	1	1	4	4	3	4	1	2	11	3	1	1	1	3	3	2	1	1	2	2	2	2	2	2	2	2	2	2	2	2	2	2	2	2	1	2	2	1	2	2	2	2	1	9	5	1	2	2
768	1	1	1	1		3	3	1	1	9	3	3	4	2	4	3	2	1	2	1	1	2	2	2	2	2	2	2	2	2	2	2	2	2	2	1	1	2	1	2	2	2	2	1	9	5	1	2	2
506	2	1	1	4	12	4	4	2	2	11	3	2	3	2	2	3	2	2	2	2	2	2	2	2	2	2	2	2	2	2	2	2	2	2	2	1	1	3	3	2	2	2	2	1		4	1	1	2
283	1	1	1	1	36	4	4	2	2	11	3	3	4	1	3	3	2	2	2	2	2	2	2	2	2	2	2	2	2	2	2	2	2	2	2	1	2	1	2	2	2	2	2	2	10	4	1	2	2
36	1	1	1	4	12	4	3	2	1	7	2	2	2	2	3	3	2	1	2	1	1	2	2	2	2	2	2	2	2	2	2	2	2	2	2	1	2	2	1	2	2	2	2	1	9	4	1	2	2
55	1	1	1	4	12	4	3	2	1	7	2	2	2	2	3	3	2	1	2	1	1	2	2	2	2	2	2	2	2	2	2	2	2	2	2	1	2	2	1	2	2	2	2	1	9	4	1	2	2
1496	1	2	1	1	7	3	2	1	1	9	3	3	4	2	2	3	2	2	2	2	2	2	2	2	2	2	2	2	2	2	2	2	2	2	2	1	2	3	3	2	2	2	2	1		4	1	2	2
108	2	1	1	4	4	4	3	2	1	6	2	3	4	2	2	3	2	2	2	2	2	2	2	2	2	2	2	2	2	2	2	2	2	2	2	1	6	2	1	3	2	3	1	1	10	3	1	1	2
1061	1	1	1	3	7	4	3	2	1	3	1	2	2	1	2	3	2	2	2	2	2	2	2	2	2	2	2	2	2	2	2	2	2	2	2	1	6	3	3	2	2	2	2	1		3	1	1	2
879	1	1	1	5	7	4	4	2	2	10	3	2	3	1	3	3	2	1	2	2	2	1	2	2	2	2	2	2	2	2	2	2	2	2	2	1	2	1	2	2	2	2	2	2	10	3	1	2	2
1457	1	2	1	1		4	3	2	1	11	3	3	4	1	3	3	2	1	2	2	2	2	2	2	2	2	2	2	2	2	2	2	2	1	2	1	1	1	2	2	2	2	2	2	10	3	1	2	2
867	1	1	1	5	65	3	3	1	1	9	3	2	2	1	1	3	2	2	2	2	2	2	2	2	2	2	2	2	2	2	2	2	2	2	2	1	2	2	1	1	1	2	2	1	7	3	1	2	2
873	1	1	1	3	2	4	4	2	2	11	3	2	2	2	2	3	2	2	2	2	2	2	2	2	2	2	2	2	2	2	2	2	2	2	2	1	1	2	1	2	2	1	1	1	7	3	1	2	2
467	2	1	1	5	10	3	4	1	2	2	1	2	3	1	2	3	2	2	2	2	2	2	2	2	2	2	2	2	2	2	2	2	2	2	2	1	2	2	1	2	2	2	2	1	9	3	1	2	2
549	1	1	1	1	15	3	4	1	2	11	3	2	2	2	2	3	2	2	2	2	2	2	2	2	2	2	2	2	2	2	2	2	2	2	2	1	1	1	2	2	3	2	2	1	11	3	1	2	2
919	2	1	1	5	23	2	2	1	1	2	1	2	3	1	2	3	2	2	2	2	2	2	2	2	2	2	2	2	2	2	2	2	2	2	2	1	7	3	3	1	3	2	2	1		3	1	2	2
1244	1	2	1	3	7	4	4	2	2	6	2	2	3	2	2	3	2	2	2	2	2	2	2	2	2	2	2	2	2	2	2	2	2	2	2	1	1	1	2	2	2	2	2	2	10	3	1	2	2
1173	1	2	1	3	19	2	4	1	2	9	3	3	4	1	2	3	2	2	2	2	2	2	2	2	2	2	2	2	2	2	2	2	2	2	2	1	7	1	2	2	2	2	2	2	10	3	1	2	2
1361	1	2	1	5	10	3	3	1	1	5	1	2	2	2	2	3	2	2	2	2	2	2	2	2	2	2	2	2	2	2	2	2	2	2	2	1		1	2	2	2	2	2	2	10	2	1	1	1
809	2	1	1	5	10	4	4	2	2	3	1	2	2	2	1	3	2	2	2	2	2	2	2	2	2	2	2	2	2	2	2	2	2	2	2	1	7	1	2	2	2	2	2	2	10	2	1	1	2
1382	1	2	1	2	45	4	4	2	2	8	2	1	1	1	1	3	2	2	2	2	2	2	2	2	2	2	2	2	2	2	2	2	2	2	2	1	1	1	2	2	2	2	2	2	10	2	1	1	2
860	1	1	1	1	13	4	4	2	2	3	1	2	2	2	1	3	2	2	2	2	2	2	2	2	2	2	2	2	2	2	2	2	2	2	2	1	7	1	2	2	2	2	2	2	10	2	1	1	2
60	1	1	1	4	4	4	4	2	2	11	3	3	4	2	2	3	2	1	2	2	2	2	2	2	2	2	2	2	2	2	2	2	2	1	2	1	2	1	2	2	2	2	2	2	10	2	1	1	2
684	2	1	1	4	4	4	4	2	2	7	2	3	4	1	1	3	2	2	2	2	2	2	2	2	2	2	2	2	2	2	2	2	2	2	2	1	7	1	2	2	2	2	2	2	10	2	1	1	2
286	1	1	1	3	19	4	4	2	2	7	2	3	4	1	2	3	2	2	2	2	2	2	2	2	2	2	2	2	2	2	2	2	2	2	2	1	7	1	2	2	2	2	2	2	10	2	1	1	2
345	1	1	1	5	7	4	4	2	2	7	2	3	4	2	1	3	2	2	2	2	2	2	2	2	2	2	2	2	2	2	2	2	2	2	2	1	7	1	2	2	2	2	2	2	10	2	1	1	2
117	1	1	1	4	4	4	4	2	2	2	1	4	5	2	1	3	2	2	2	2	2	2	2	2	2	2	2	2	2	2	2	2	2	2	2	1	7	1	2	2	2	2	2	2	10	2	1	1	2
1385	1	2	1	5	40	4	3	2	1	5	1	3	4	1	1	3	2	1	2	1	2	2	2	2	2	2	2	2	2	2	2	2	1	2	2	1		2	1	2	1	2	1	1	7	2	1	1	2
910	1	1	1	4	4	4	4	2	2	8	2	3	4	2	1	3	2	2	2	2	2	2	2	2	2	2	2	2	2	2	2	2	2	2	2	1	7	2	1	2	2	2	2	1	9	2	1	1	2
412	1	1	1	5	10	4	4	2	2	10	3	3	4	2	2	3	2	2	2	2	2	2	2	2	2	2	2	2	2	2	2	2	2	2	2	1	6	2	1	2	3	2	2	1	10	2	1	1	2
760	2	1	1	4		4	4	2	2	2	1	2	3	1	1	3	2	1	2	2	2	2	2	2	2	2	2	2	2	2	2	2	2	1	2	1	5	1	2	2	2	2	2	2	10	2	1	1	2
114	1	1	1	4	7	4	4	2	2	5	1	2	2	1	1	3	2	1	2	2	2	2	2	2	2	2	2	2	2	2	2	2	2	1	2	1	7	1	2	2	2	2	2	2	10	2	1	1	2
348	1	1	1	1	52	4	4	2	2	5	1	3	4	2	2	3	2	1	2	2	2	2	2	2	2	2	2	2	2	2	2	2	2	1	2	1	7	1	2	2	2	2	2	2	10	2	1	1	2
188	1	1	1	1	1	3	3	1	1	11	3	3	4	1	3	3	2	1	2	2	2	2	2	2	2	2	2	1	2	2	2	2	2	2	2	1	6	1	2	2	2	1	1	1	8	2	1	1	2
798	2	1	1	4	6	4	2	2	1	10	3	3	4	1	2	3	2	2	2	2	2	2	2	2	2	2	2	2	2	2	2	2	2	2	2	1	1	1	2	2	2	2	2	2	10	2	1	2	2
974	1	1	1	5	10	4	3	2	1	10	3	1	1	1	1	3	2	2	2	2	2	2	2	2	2	2	2	2	2	2	2	2	2	2	2	1	1	1	2	2	2	2	2	2	10	2	1	2	2
227	1	1	1	4	71	4	2	2	1	3	1	4	5	1	2	3	2	2	2	2	2	2	2	2	2	2	2	2	2	2	2	2	2	2	2	1	7	3	3	2	2	3	1	1		2	1	2	2
204	1	1	1	1	52	3	3	1	1	5	1	2	3	2	2	3	2	2	2	2	2	2	2	2	2	2	2	2	2	2	2	2	2	2	2	1	7	1	2	2	2	2	2	2	10	2	1	2	2
881	1	1	1	4	39	1	2	1	1	9	3	3	4	1	2	3	2	2	2	2	2	2	2	2	2	2	2	2	2	2	2	2	2	2	2	1	1	1	2	2	2	2	2	2	10	2	1	2	2
454	1	1	1	3	5	4	4	2	2	6	2	1	1	2	1	3	2	2	2	2	2	2	2	2	2	2	2	2	2	2	2	2	2	2	2	1	7	1	2	2	2	2	2	2	10	2	1	2	2
1489	1	2	1	1	1	4	4	2	2	5	1	1	1	1	3	3	2	2	2	2	2	2	2	2	2	2	2	2	2	2	2	2	2	2	2	1	2	1	2	2	2	2	2	2	10	2	1	2	2
894	1	1	1	4	4	4	4	2	2	11	3	1	1	2	1	3	2	2	2	2	2	2	2	2	2	2	2	2	2	2	2	2	2	2	2	1	7	1	2	2	2	2	2	2	10	2	1	2	2
905	1	1	1	4	4	4	4	2	2	10	3	2	2	2	2	3	2	2	2	2	2	2	2	2	2	2	2	2	2	2	2	2	2	2	2	1	1	1	2	2	2	2	2	2	10	2	1	2	2
442	1	1	1	5	10	4	3	2	1	11	3	3	4	1	2	3	2	2	2	2	2	2	2	2	2	2	2	2	2	2	2	2	2	2	2	1	2	1	2	2	2	2	2	2	10	2	1	2	2
619	1	1	1	2	10	4	4	2	2	8	2	3	4	2	3	3	2	2	2	2	2	2	2	2	2	2	2	2	2	2	2	2	2	2	2	1	7	1	2	2	2	2	2	2	10	2	1	2	2
618	1	1	1	5	10	2	2	1	1	3	1	4	5	1	1	3	2	2	2	2	2	2	2	2	2	2	2	2	2	2	2	2	2	2	2	1	1	1	2	2	2	2	2	2	10	2	1	2	2
221	1	1	1	1	63	4	4	2	2	11	3	2	2	2	3	3	2	2	2	2	2	2	2	2	2	2	2	2	2	2	2	2	2	2	2	1	7	2	1	1	1	1	2	1	6	2	1	2	2
149	1	1	1	1	7	4	3	2	1	11	3	3	4	1	1	3	2	2	2	2	2	2	2	2	2	2	2	2	2	2	2	2	2	2	2	1	1	2	1	2	2	2	2	1	9	2	1	2	2
648	1	1	1	4	4	4	4	2	2	4	1	1	1	1	2	3	2	2	2	2	2	2	2	2	2	2	2	2	2	2	2	2	2	2	2	1	2	1	2	2	2	2	1	1	9	2	1	2	2
184	1	1	1	1	65	4	4	2	2	9	3	2	3	2	1	3	2	2	2	2	2	2	2	2	2	2	2	2	2	2	2	2	2	2	2	1	5	1	2	3	2	2	2	1	11	2	1	2	2
1075	2	1	1	3	2	3	3	1	1	2	1	3	4	1	2	3	2	2	2	2	2	2	2	2	2	2	2	2	2	2	2	2	2	2	2	1	7	1	2	3	3	3	3	1	14	2	1	2	2
54	2	1	1	4	4	4	4	2	2	3	1	1	1	2	2	3	2	1	2	2	2	2	2	2	2	2	2	2	2	2	2	2	2	1	2	1	2	3	3	2	2	2	2	1		2	1	2	2
976	1	3	1	4	4	4	4	2	2	9	3	1	1	1	2	3	2	2	2	2	2	2	2	2	2	2	2	2	2	2	2	2	2	2	2	1	7	1	2	2	2	2	2	2	10	2	1	2	2
1187	1	2	1	4	4	4	4	2	2	11	3	3	4	1	1	3	2	2	2	2	2	2	2	2	2	2	2	2	2	2	2	2	2	2	2	1	1	3	3	2	2	2	2	1		2	1	2	2
1125	1	2	1	5	10	3	3	1	1	11	3	2	2	1	1	3	2	2	2	2	2	2	2	2	2	2	2	2	2	2	2	2	2	2	2	1	7	1	2	2	2	2	2	2	10	2	1	2	2
1116	1	2	1	3	19	4	4	2	2	7	2	3	4	2	2	3	2	2	2	2	2	2	2	2	2	2	2	2	2	2	2	2	2	2	2	1	1	1	2	2	2	2	2	2	10	2	1	2	2
1133	1	2	1	5	10	4	4	2	2	6	2	4	5	2	1	3	2	2	2	2	2	2	2	2	2	2	2	2	2	2	2	2	2	2	2	1	7	1	2	1	2	2	2	1	9	2	1	2	2
1412	1	2	1	2	49	4	4	2	2	6	2	2	2	1	3	3	2	2	2	2	2	2	2	2	2	2	2	2	2	2	2	2	2	2	2	1	7	3	3	2	2	2	2	1		2	1	2	2
1522	1	2	1	1	1	4	4	2	2	10	3	2	2	1	1	3	2	2	2	2	2	2	2	2	2	2	2	2	2	2	2	2	2	2	2	1	7	1	2	2	2	2	2	2	10	1	1	1	1
387	1	1	1	5	10	4	4	2	2	6	2	1	1	2	2	3	2	2	2	2	2	2	2	2	2	2	2	2	2	2	2	2	2	2	2	1	7	1	2	2	2	2	2	2	10	1	1	1	2
1354	1	2	1	5	10	3	3	1	1	2	1	2	2	1	3	3	2	2	2	2	2	2	2	2	2	2	2	2	2	2	2	2	2	2	2	1	7	1	2	2	2	2	2	2	10	1	1	1	2
325	1	1	1	4	4	4	3	2	1	7	2	3	4	2	3	3	2	2	2	2	2	2	2	2	2	2	2	2	2	2	2	2	2	2	2	1	7	3	3	2	2	2	2	1		1	1	1	2
397	1	1	1	5	10	4	4	2	2	5	1	1	1	1	1	3	2	2	2	2	2	2	2	2	2	2	2	2	2	2	2	2	2	2	2	1	7	1	2	2	2	2	2	2	10	1	1	1	2
904	1	1	1	4	4	4	4	2	2	9	3	2	2	1	2	3	2	2	2	2	2	2	2	2	2	2	2	2	2	2	2	2	2	2	2	1	7	1	2	2	2	2	2	2	10	1	1	1	2
411	1	1	1	5	10	4	4	2	2	6	2	2	3	2	1	3	2	2	2	2	2	2	2	2	2	2	2	2	2	2	2	2	2	2	2	1	1	1	2	2	2	2	2	2	10	1	1	1	2
1247	1	2	1	5	10	4	4	2	2	8	2	3	4	2	2	3	2	2	2	2	2	2	2	2	2	2	2	2	2	2	2	2	2	2	2	1	2	1	2	2	2	2	2	2	10	1	1	1	2
810	1	1	1	5	10	4	2	2	1	8	2	4	5	2	2	3	2	1	2	2	2	2	2	2	2	2	2	2	2	2	2	2	2	1	2	1	2	1	2	2	2	2	2	2	10	1	1	1	2
799	2	1	1	4	4	1	2	1	1	2	1	2	2	2	2	3	2	2	2	2	2	2	2	2	2	2	2	2	2	2	2	2	2	2	2	1	2	3	3	2	2	2	2	1		1	1	1	2
1428	1	2	1	2	62	4	3	2	1	11	3	1	1	2	1	3	2	2	2	2	2	2	2	2	2	2	2	2	2	2	2	2	2	2	2	1	7	3	3	2	2	2	2	1		1	1	1	2
914	1	1	1	4	11	4	4	2	2	6	2	2	3	2	1	3	2	2	2	2	2	2	2	2	2	2	2	2	2	2	2	2	2	2	2	1	7	1	2	2	2	2	2	2	10	1	1	2	1
995	1	1	1	5	10	4	4	2	2	3	1	2	2	2	1	3	2	2	2	2	2	2	2	2	2	2	2	2	2	2	2	2	2	2	2	1	7	1	2	2	2	2	2	2	10	1	1	2	2
948	1	1	1	2	7	4	4	2	2	6	2	1	1	1	1	3	2	2	2	2	2	2	2	2	2	2	2	2	2	2	2	2	2	2	2	1	2	1	2	2	2	2	2	2	10	1	1	2	2
1015	2	1	1	2	30	4	4	2	2	11	3	1	1	2	3	3	2	1	2	2	2	2	2	2	2	2	2	2	2	2	2	2	2	1	2	1	1	1	2	2	2	2	2	2	10	1	1	2	2
714	2	1	1	2		2	3	1	1	11	3	3	4	2	1	3	2	2	2	2	2	2	2	2	2	2	2	2	2	2	2	2	2	2	2	1	2	1	2	2	2	2	2	2	10	1	1	2	2
991	1	1	1	4	4	4	4	2	2	8	2	3	4	1	3	3	2	2	2	2	2	2	2	2	2	2	2	2	2	2	2	2	2	2	2	1	2	1	2	2	2	2	2	2	10	1	1	2	2
329	1	1	1	1	36	4	4	2	2	11	3	3	4	2	3	3	2	2	2	2	2	2	2	2	2	2	2	2	2	2	2	2	2	2	2	1		1	2	2	2	2	2	2	10	1	1	2	2
861	1	1	1	3	51	3	3	1	1	11	3	3	4	2	2	3	2	2	2	2	2	2	2	2	2	2	2	2	2	2	2	2	2	2	2	1	2	2	1	2	2	2	2	1	9	1	1	2	2
1140	1	2	1	1	65	4	4	2	2	4	1	3	4	1	3	3	2	1	2	2	2	2	2	2	2	1	2	2	2	2	2	2	2	2	2	1	1	1	2	2	3	3	3	1	13	1	1	2	2
682	1	1	1	2	10	4	4	2	2	8	2	2	3	1	3	3	2	1	2	2	2	2	2	2	2	2	1	2	2	2	2	2	2	2	2	1	7	3	3	2	2	3	3	1		1	1	2	2
726	1	1	1	4		4	4	2	2	7	2	2	2	2	1	3	2	2	2	2	2	2	2	2	2	2	2	2	2	2	2	2	2	2	2	1	7	1	2	2	2	2	2	2	10	1	1	2	2
811	1	3	1	4	7	4	4	2	2	10	3	4	5	2	1	3	2	2	2	2	2	2	2	2	2	2	2	2	2	2	2	2	2	2	2	1	2	1	2	2	2	2	2	2	10	1	1	2	2
1237	1	2	1	1	1	2	4	1	2	10	3	3	4	1	2	3	2	1	2	2	1	2	2	2	2	2	2	2	2	2	2	2	2	2	2	1	1	1	2	2	2	2	2	2	10	1	1	2	2
1368	1	2	1	5	10	4	4	2	2	9	3	2	2	2	1	3	2	2	2	2	2	2	2	2	2	2	2	2	2	2	2	2	2	2	2	1	7	1	2	1	2	2	2	1	9	1	1	2	2
1516	1	2	1	5	10	4	2	2	1	8	2	3	4	1	3	2	1	1	2	1	2	2	2	2	2	2	2	2	2	2	2	2	2	2	2	1	2	1	2	2	2	2	2	2	10	6	2	1	2
1184	1	2	1	5	10	4	4	2	2	11	3	3	4	1	3	2	1	1	2	1	2	2	2	1	2	2	2	2	2	2	2	2	2	2	2	1	2	1	2	2	2	3	3	1	12	6	2	1	2
691	1	1	1	1	65	2	4	1	2	5	1	2	2	2	3	2	1	1	2	1	1	2	1	2	2	2	2	2	2	2	2	2	2	2	2	1	1	3	3	2	2	2	2	1		6	2	1	2
751	2	3	1	1		1	3	1	1	11	3	3	4	1	4	2	1	1	2	1	1	2	2	2	2	1	2	2	2	2	2	2	2	2	2	1	1	3	3	2	2	2	2	1		6	2	1	2
834	1	1	1	5	30	3	2	1	1	10	3	3	4	2	3	2	1	1	2	1	1	2	2	2	2	1	2	2	2	2	2	2	2	2	2	1	2	1	2	2	2	2	2	2	10	6	2	2	2
509	1	1	1	5	10	3	2	1	1	11	3	2	3	1	3	2	1	1	2	1	1	2	2	2	2	2	2	2	2	2	2	2	2	2	2	1	2	2	1	3	1	2	2	1	9	6	2	2	2
181	1	1	1	5	10	3	3	1	1	9	3	2	2	1	4	2	1	1	2	1	1	2	2	2	2	2	2	2	2	2	2	2	2	1	2	1	5	2	1	3	2	2	2	1	10	6	2	2	2
589	2	1	1	1	8	1	2	1	1	5	1	1	1	2	4	2	1	2	2	2	2	2	2	2	2	2	2	2	2	2	2	2	2	2	2	1	2	2	1	2	2	2	2	1	9	5	1	1	2
1062	1	3	1	3	2	4	4	2	2	10	3	1	1	1	2	2	1	1	2	2	2	2	2	2	2	2	2	2	1	2	2	2	2	2	2	1	1	1	2	2	2	2	2	2	10	5	1	1	2
543	1	1	1	5	10	3	4	1	2	11	3	3	4	1	3	2	1	1	2	2	1	2	2	2	2	2	2	2	2	2	2	2	2	2	2	1	2	2	1	1	3	2	2	1	9	5	1	1	2
1067	1	1	1	3	2	4	4	2	2	6	2	1	1	1	2	2	1	2	2	2	2	2	2	2	2	2	2	2	2	2	2	2	2	2	2	1	1	1	2	1	1	2	2	1	8	5	1	2	2
596	1	1	1	5	40	3	3	1	1	8	2	1	1	1	4	2	1	1	1	1	1	2	2	2	2	2	2	2	2	2	2	2	2	2	2	1	2	3	3	2	2	2	2	1		5	1	2	2
926	1	1	1	4	7	4	3	2	1	5	1	3	4	1	4	2	1	1	2	1	2	2	2	2	2	2	2	2	2	2	2	2	2	2	2	1	2	2	1	2	2	1	1	1	7	4	1	1	2
109	1	1	1	3	4	4	4	2	2	6	2	3	4	1	3	2	1	1	2	2	2	2	2	2	2	1	2	2	2	2	2	2	2	2	2	1	1	1	2	2	2	2	2	2	10	4	1	1	2
373	1	1	1	1	1	4	4	2	2	7	2	2	3	1	4	2	1	1	1	1	2	2	2	2	2	2	2	2	2	2	1	2	2	1	2	1	2	2	1	1	1	1	1	1	5	4	1	1	2
942	1	1	1	5	10	4	4	2	2	11	3	3	4	2	3	2	1	1	2	2	1	2	2	2	2	2	2	1	1	2	1	2	2	2	2	1	2	3	3	3	3	2	3	1		4	1	1	2
195	1	1	1	1	1	4	4	2	2	7	2	2	3	1	4	2	1	1	1	1	2	2	2	2	2	2	2	2	2	2	1	2	2	1	2	1	2	2	1	1	1	1	1	1	5	4	1	2	2
1018	1	1	1	1	27	2	2	1	1	11	3	3	4	2	3	2	1	1	1	2	2	2	2	2	2	2	2	2	2	2	2	2	2	2	2	1	1	2	1	2	2	1	1	1	7	4	1	2	2
933	1	1	1	4	4	4	3	2	1	10	3	2	3	1	3	2	1	1	2	1	1	2	2	2	2	1	2	2	2	2	2	2	2	2	2	1	7	2	1	2	2	2	2	1	9	4	1	2	2
167	1	1	1	1	1	4	3	2	1	7	2	2	3	1	4	2	1	1	2	2	2	2	2	2	2	2	2	2	2	2	2	2	2	1	2	1	1	3	3	2	2	1	1	1		4	1	2	2
1275	1	2	1	3	4	3	4	1	2	11	3	2	3	2	3	2	1	1	1	2	2	2	1	2	2	1	2	2	2	2	2	2	2	2	2	1	1	3	3	2	2	2	1	1		4	1	2	2
609	1	1	1	5	10	2	3	1	1	11	3	3	4	1	4	2	1	1	2	2	1	2	2	2	2	2	2	2	2	2	2	2	2	2	2	1	1	3	3	3	3	2	2	1		4	1	2	2
1264	1	2	1	5	24	4	3	2	1	9	3	3	4	1	3	2	1	1	1	2	2	2	2	2	2	2	2	2	2	2	2	2	2	2	2	1	1	1	2	2	2	2	2	2	10	4	1	2	2
1449	1	2	1	5	10	4	4	2	2	11	3	2	2	2	4	2	1	1	1	2	2	2	2	2	2	2	2	2	2	2	2	2	2	2	2	1	1	2	1	2	2	2	2	1	9	4	1	2	2
725	1	1	1	4		2	3	1	1	5	1	3	4	1	3	2	1	1	1	2	2	2	2	2	2	2	2	2	1	2	2	2	2	2	2	1	1	1	2	2	2	2	2	2	10	3	1	1	2
1514	1	2	1	4	31	3	3	1	1	6	2	2	4	1	2	2	1	1	1	2	2	2	2	2	2	2	2	2	2	2	2	2	2	2	2	1	1	1	2	2	2	2	2	2	10	3	1	1	2
1445	1	2	1	5	10	3	4	1	2	10	3	2	3	2	3	2	1	1	2	2	2	2	2	2	2	2	2	2	2	2	2	2	2	1	2	1	2	1	2	2	2	2	2	2	10	3	1	1	2
950	1	1	1	2	45	3	4	1	2	5	1	2	3	2	4	2	1	1	1	2	2	2	2	2	2	2	2	2	2	1	2	2	2	2	2	1	2	2	1	1	2	1	1	1	6	3	1	1	2
887	1	1	1	5	10	4	3	2	1	11	3	3	4	1	4	2	1	1	2	1	2	2	2	2	2	2	2	2	2	2	2	2	2	2	2	1	7	2	1	2	3	2	2	1	10	3	1	1	2
906	1	1	1	4	4	4	4	2	2	4	1	2	3	2	2	2	1	1	2	1	2	2	2	2	2	2	2	2	2	2	2	2	2	2	2	1	2	3	3	2	2	1	1	1		3	1	1	2
637	1	1	1	5	10	4	4	2	2	7	2	2	2	2	2	2	1	1	2	2	1	2	2	2	2	2	2	2	2	2	2	2	2	2	2	1	2	3	3	2	2	2	2	1		3	1	1	2
447	1	1	1	5	10	4	4	2	2	10	3	1	1	1	3	2	1	1	2	1	2	2	2	2	2	2	2	2	2	2	2	2	2	2	2	1	2	3	3	2	2	2	3	1		3	1	1	2
764	1	1	1	5		4	4	2	2	11	3	3	4	1	5	2	1	1	1	1	1	2	2	2	1	2	2	2	2	2	2	2	2	2	2	1	2	2	1	1	2	2	2	1	8	3	1	2	2
875	1	1	1	4	12	4	4	2	2	10	3	2	2	1	3	2	1	1	2	1	2	2	2	2	2	2	2	2	2	2	2	2	2	2	2	1	2	2	1	3	3	2	2	1	11	3	1	2	2
750	1	1	1	1		4	3	2	1	10	3	1	1	2	2	2	1	1	2	2	1	2	2	2	2	2	2	2	2	2	2	2	2	2	2	1	2	1	2	2	2	2	2	2	10	2	1	1	2
536	1	1	1	5	10	2	4	1	2	8	2	3	4	2	3	2	1	1	2	1	2	2	2	2	2	2	2	2	2	2	1	2	2	2	2	1	2	1	2	2	2	2	2	2	10	2	1	1	2
129	1	1	1	4	7	4	4	2	2	7	2	1	1	1	2	2	1	1	1	2	1	2	2	2	2	2	2	2	2	2	2	2	2	2	2	1	2	1	2	2	2	2	2	2	10	2	1	1	2
328	1	1	1	1	7	3	3	1	1	11	3	3	4	2	3	2	1	1	2	2	1	2	2	2	2	2	2	2	2	2	2	2	2	2	2	1	2	1	2	2	2	2	2	2	10	2	1	1	2
632	1	1	1	4	7	2	1	1	1	7	2	4	5	2	2	2	1	1	2	2	2	2	2	2	2	2	2	2	2	1	2	2	2	2	2	1	6	1	2	2	2	2	2	2	10	2	1	1	2
305	1	3	1	1	57	3	3	1	1	10	3	1	1	1	4	2	1	1	2	2	1	1	1	2	2	2	2	2	1	2	2	2	2	2	2	1	2	2	1	2	1	1	1	1	6	2	1	1	2
482	1	1	1	5	40	4	4	2	2	11	3	1	1	1	5	2	1	1	1	2	1	2	2	1	2	2	2	2	2	1	2	2	2	2	2	1	1	2	1	2	2	2	2	1	9	2	1	1	2
246	1	1	1	4	4	4	2	2	1	11	3	2	3	1	3	2	1	1	2	2	2	2	2	2	2	1	2	2	2	2	2	2	2	2	2	1	2	2	1	2	2	2	2	1	9	2	1	1	2
1442	1	2	1	5	10	4	4	2	2	8	2	2	2	2	3	2	1	1	2	1	1	2	2	2	2	2	2	2	2	2	2	2	2	2	2	1	2	2	1	2	2	2	2	1	9	2	1	1	2
1310	1	2	1	3	2	4	4	2	2	10	3	3	4	1	3	2	1	1	2	1	2	2	1	2	2	2	2	2	2	1	1	2	2	2	2	1	2	2	1	2	2	2	2	1	9	2	1	1	2
389	1	1	1	5	10	4	4	2	2	3	1	1	1	1	3	2	1	1	2	2	1	2	2	2	2	2	2	2	2	2	2	2	2	2	2	1	2	3	3	2	2	2	1	1		2	1	1	2
520	1	1	1	5	10	3	3	1	1	9	3	3	4	1	2	2	1	1	2	2	1	2	2	2	2	2	2	2	2	2	2	2	2	2	2	1	7	1	2	2	2	2	2	2	10	2	1	2	2
105	1	1	1	4	7	4	4	2	2	7	2	1	1	1	2	2	1	1	1	2	1	2	2	2	2	2	2	2	2	2	2	2	2	2	2	1	2	1	2	2	2	2	2	2	10	2	1	2	2
729	2	1	1	5		2	2	1	1	11	3	3	4	2	3	2	1	1	1	1	2	1	2	2	2	2	2	2	2	2	2	2	2	2	2	1	1	2	1	1	3	2	2	1	9	2	1	2	2
1193	1	2	1	1	48	4	4	2	2	7	2	3	4	2	3	2	1	1	1	2	2	1	2	2	2	2	2	2	2	2	2	2	2	2	2	1	5	2	1	2	2	1	1	1	7	2	1	2	2
148	1	1	1	1	1	4	4	2	2	5	1	2	3	1	4	2	1	1	2	2	1	2	2	2	2	2	2	2	2	2	2	2	2	2	2	1	2	2	1	2	2	2	1	1	8	2	1	2	2
381	1	1	1	4	11	3	3	1	1	4	1	2	2	2	4	2	1	1	2	2	1	2	2	2	2	2	2	2	1	2	2	2	2	2	2	1	2	2	1	2	3	1	3	1	10	2	1	2	2
112	1	1	1	4	4	4	4	2	2	9	3	4	5	1	3	2	1	2	2	2	2	2	2	2	2	2	2	2	2	2	2	2	2	2	2	1	1	2	1	2	3	2	2	1	10	2	1	2	2
652	1	3	1	1	1	3	1	1	1	9	3	3	4	2	3	2	1	1	2	1	2	2	2	2	2	2	2	2	2	2	2	2	2	2	2	1	7	1	2	2	2	2	1	1	9	2	1	2	2
838	1	1	1	1	4	4	4	2	2	9	3	1	1	2	3	2	1	1	2	2	2	1	2	2	2	2	2	2	2	2	2	2	2	2	2	1	4	2	1	1	2	2	2	1	8	2	1	2	2
546	2	1	1	5	10	4	4	2	2	2	1	4	5	2	3	2	1	1	2	1	2	2	2	2	2	2	2	2	2	2	2	2	2	2	2	1	7	2	1	1	2	2	2	1	8	2	1	2	2
636	2	1	1	5	10	4	4	2	2	7	2	3	4	2	2	2	1	1	2	1	2	2	2	2	1	2	2	2	2	2	2	2	2	2	2	1	1	3	3	2	2	2	2	1		2	1	2	2
590	2	1	1	2	10	4	4	2	2	11	3	3	4	2	2	2	1	1	2	1	1	2	2	2	2	2	2	2	2	2	2	2	2	2	2	1	2	3	3	2	2	2	2	1		2	1	2	2
1423	1	2	1	4	12	4	4	2	2	10	3	2	2	1	2	2	1	1	1	1	1	2	2	2	2	2	2	2	2	2	2	2	2	2	2	1	2	2	1	2	2	2	2	1	9	2	1	2	2
1189	1	2	1	4	6	4	4	2	2	5	1	3	4	2	2	2	1	1	2	2	2	1	2	2	2	2	2	2	2	2	2	2	2	1	2	1	1	1	2	2	2	1	2	1	9	2	1	2	2
1456	1	2	1	4	4	4	3	2	1	7	2	2	3	1	3	2	1	1	2	2	2	2	2	2	1	1	2	2	2	2	2	2	2	2	2	1	2	2	1	2	2	2	2	1	9	1	1	1	1
113	1	1	1	1	4	4	4	2	2	5	1	3	4	1	4	2	1	2	2	2	2	2	2	2	2	2	2	2	2	2	2	2	2	2	2	1	2	3	3	2	2	2	1	1		1	1	1	2
963	1	1	1	2	45	4	4	2	2	7	2	1	1	1	2	2	1	1	2	2	2	2	2	2	2	2	2	2	2	2	2	2	2	1	2	1	7	1	2	2	2	2	2	2	10	1	1	1	2
237	1	1	1	4	4	4	2	2	1	11	3	2	3	2	2	2	1	1	2	2	2	1	2	2	2	2	2	2	2	2	2	2	2	2	2	1	7	1	2	2	2	2	2	2	10	1	1	1	2
561	1	1	1	5	10	3	3	1	1	4	1	2	2	2	2	2	1	1	2	2	2	2	2	2	2	2	2	2	2	2	1	2	2	2	2	1	2	1	2	2	2	2	2	2	10	1	1	1	2
966	2	1	1	2	45	4	4	2	2	11	3	2	2	2	3	2	1	1	1	2	2	2	2	2	2	2	2	2	2	2	2	2	2	1	2	1	2	1	2	2	2	2	2	2	10	1	1	1	2
48	1	1	1	5	10	4	4	2	2	6	2	2	2	1	2	2	1	1	1	2	2	1	2	2	1	1	2	2	1	1	1	1	2	2	2	1	7	1	2	2	2	2	2	2	10	1	1	1	2
132	1	1	1	1	4	4	4	2	2	5	1	3	4	1	4	2	1	1	2	1	2	2	2	2	2	2	2	2	2	2	2	2	2	2	2	1	2	3	3	2	2	2	1	1		1	1	1	2
249	1	1	1	4	4	4	2	2	1	11	3	2	3	2	2	2	1	1	2	2	2	1	2	2	2	2	2	2	2	2	2	2	2	2	2	1	7	1	2	2	2	2	2	2	10	1	1	1	2
571	1	1	1	5	10	4	4	2	2	10	3	3	4	2	2	2	2	2	2	2	2	2	2	2	2	2	2	2	2	2	2	2	2	2	2	1	2	1	2	2	2	2	2	2	10	5	1	2	2
59	1	1	1	2	7	4	4	2	2	4	1	2	3	2	4	2	2	1	2	2	2	2	2	2	2	2	2	2	2	2	2	2	2	1	2	1	2	1	2	2	2	2	2	2	10	4	1	1	2
1044	2	1	1	1	52	1	2	1	1	11	3	3	4	2	3	2	2	1	2	2	2	2	2	2	2	2	2	2	2	2	2	2	2	1	2	1	1	2	1	2	2	2	2	1	9	4	1	1	2
663	1	1	1	4	4	3	4	1	2	9	3	3	4	1	4	2	2	2	2	2	2	2	2	2	2	2	2	2	2	2	2	2	2	2	2	1		2	1	2	2	2	2	1	9	4	1	1	2
216	1	1	1	4	4	2	2	1	1	2	1	2	2	2	3	2	2	2	2	2	2	2	2	2	2	2	2	2	2	2	2	2	2	2	2	1	2	2	1	3	2	1	1	1	8	4	1	1	2
264	1	1	1	4	4	2	2	1	1	2	1	2	2	2	3	2	2	2	2	2	2	2	2	2	2	2	2	2	2	2	2	2	2	2	2	1	2	2	1	3	2	1	1	1	8	4	1	1	2
165	1	1	1	1	65	4	3	2	1	10	3	3	4	1	3	2	2	2	2	2	2	2	2	2	2	2	2	2	2	2	2	2	2	2	2	1	1	1	2	2	2	2	2	2	10	4	1	2	2
844	1	1	1	4	7	3	4	1	2	2	1	3	4	1	2	2	2	2	2	2	2	2	2	2	2	2	2	2	2	2	2	2	2	2	2	1	7	3	3	2	2	1	1	1		4	1	2	2
1491	1	2	1	1	1	4	3	2	1	11	3	1	1	1	3	2	2	2	2	2	2	2	2	2	2	2	2	2	2	2	2	2	2	2	2	1	2	1	2	2	2	2	2	2	10	4	1	2	2
1142	1	2	1	3	35	4	4	2	2	11	3	2	2	2	4	2	2	2	2	2	2	2	2	2	2	2	2	2	2	2	2	2	2	2	2	1	1	2	1	2	2	1	1	1	7	3	1	1	2
1082	1	1	1	3	5	4	4	2	2	11	3	2	2	2	2	2	2	2	2	2	2	2	2	2	2	2	2	2	2	2	2	2	2	2	2	1	1	1	2	2	2	2	2	2	10	3	1	1	2
1052	1	1	1	3	19	2	4	1	2	11	3	3	4	1	3	2	2	2	2	2	2	2	2	2	2	2	2	2	2	2	2	2	2	2	2	1	2	1	2	2	2	2	2	2	10	3	1	1	2
544	1	1	1	5	10	2	3	1	1	3	1	3	4	1	3	2	2	1	2	2	1	2	2	2	2	2	2	2	2	2	2	2	2	2	2	1	2	2	1	3	2	2	2	1	10	3	1	1	2
92	1	1	1	4	12	3	3	1	1	5	1	1	1	2	3	2	2	1	1	2	2	2	2	2	2	2	2	2	2	2	2	2	2	2	2	1	1	1	2	2	2	2	3	1	11	3	1	1	2
93	1	1	1	4	12	3	3	1	1	5	1	1	1	2	3	2	2	1	1	2	2	2	2	2	2	2	2	2	2	2	2	2	2	2	2	1	1	1	2	2	2	2	3	1	11	3	1	1	2
343	1	1	1	5	10	4	4	2	2	9	3	2	3	1	2	2	2	2	2	2	2	2	2	2	2	2	2	2	2	2	2	2	2	2	2	1	1	3	3	2	2	2	2	1		3	1	1	2
1254	1	2	1	1	33	4	4	2	2	11	3	3	4	1	3	2	2	2	2	2	2	2	2	2	2	2	2	2	2	2	2	2	2	2	2	1	2	3	3	2	3	2	2	1		3	1	1	2
30	2	1	1	4	4	4	4	2	2	7	2	3	4	1	5	2	2	1	1	2	2	2	2	2	2	2	2	2	2	2	2	2	2	2	2	1	2	2	1	1	2	3	3	1	10	3	1	2	2
564	2	1	1	5	10	4	4	2	2	8	2	3	4	2	2	2	2	2	2	2	2	2	2	2	2	2	2	2	2	2	2	2	2	2	2	1	2	1	2	2	2	2	2	2	10	3	1	2	2
441	1	1	1	5	10	4	4	2	2	9	3	1	1	1	3	2	2	2	2	2	2	2	2	2	2	2	2	2	2	2	2	2	2	2	2	1	1	1	2	2	2	2	2	2	10	3	1	2	2
742	2	1	1	5		3	4	1	2	11	3	3	4	1	3	2	2	2	2	2	2	2	2	2	2	2	2	2	2	2	2	2	2	2	2	1	2	1	2	2	2	2	2	2	10	3	1	2	2
967	2	1	1	2	45	3	4	1	2	11	3	2	3	1	3	2	2	2	2	2	2	2	2	2	2	2	2	2	2	2	2	2	2	2	2	1	7	1	2	2	2	2	2	2	10	2	1	1	2
1063	1	1	1	3	2	4	4	2	2	8	2	3	4	1	2	2	2	2	2	2	2	2	2	2	2	2	2	2	2	2	2	2	2	2	2	1	1	1	2	2	2	2	2	2	10	2	1	1	2
1343	1	2	1	2	45	3	4	1	2	5	1	2	3	2	2	2	2	2	2	2	2	2	2	2	2	2	2	2	2	2	2	2	2	2	2	1	2	2	1	1	2	2	2	1	8	2	1	1	2
1469	1	2	1	1	52	4	4	2	2	3	1	2	3	2	1	2	2	1	1	2	2	2	2	2	2	2	2	2	2	2	2	2	2	2	2	1	2	2	1	1	3	2	2	1	9	2	1	1	2
337	1	3	1	1	36	4	4	2	2	10	3	3	4	2	2	2	2	2	2	2	2	2	2	2	2	2	2	2	2	2	2	2	2	2	2	1	2	2	1	2	2	1	1	1	7	2	1	1	2
1400	1	2	1	5	4	1	1	1	1	11	3	3	4	1	3	2	2	1	2	2	1	2	2	2	2	2	2	2	2	2	2	2	2	2	2	1	1	2	1	2	2	2	2	1	9	2	1	1	2
1083	1	1	1	3	26	3	4	1	2	2	1	2	2	2	2	2	2	2	2	2	2	2	2	2	2	2	2	2	2	2	2	2	2	2	2	1	2	1	2	2	2	3	3	1	12	2	1	1	2
294	1	1	1	1	1	4	4	2	2	5	1	1	1	2	1	2	2	1	2	2	1	2	2	2	2	2	2	2	2	2	2	2	2	2	2	1	7	1	2	2	2	2	2	2	10	2	1	1	2
472	1	1	1	5	16	4	4	2	2	3	1	2	3	1	2	2	2	2	2	2	2	2	2	2	2	2	2	2	2	2	2	2	2	2	2	1	2	1	2	2	2	2	2	2	10	2	1	2	2
727	1	1	1	4		1	2	1	1	11	3	3	4	2	2	2	2	1	2	2	2	2	2	2	2	2	2	2	2	2	2	2	2	1	2	1	7	1	2	2	2	2	2	2	10	2	1	2	2
239	2	1	1	4	4	4	4	2	2	11	3	3	4	2	3	2	2	1	2	1	2	2	2	2	2	2	2	2	2	2	2	2	2	2	2	1	1	2	1	2	2	2	2	1	9	2	1	2	2
258	2	1	1	4	4	4	4	2	2	11	3	3	4	2	3	2	2	1	2	1	2	2	2	2	2	2	2	2	2	2	2	2	2	2	2	1	1	2	1	2	2	2	2	1	9	2	1	2	2
1048	1	1	1	3	2	4	4	2	2	3	1	1	1	1	3	2	2	2	2	2	2	2	2	2	2	2	2	2	2	2	2	2	2	2	2	1	2	1	2	3	2	2	2	1	11	2	1	2	2
1096	1	1	1	3	5	4	4	2	2	11	3	2	3	1	2	2	2	1	2	2	1	2	2	2	2	2	2	2	2	2	2	2	2	2	2	1	2	1	2	3	2	2	2	1	11	2	1	2	2
395	1	3	2	1	48	4	2	2	1	7	2	3	4	1	2	2	2	1	2	2	2	2	2	2	2	2	2	2	2	2	2	2	2	1	2	1	7	3	3	2	2	2	2	1		2	1	2	2
1384	1	2	1	5	10	4	3	2	1	8	2	1	1	1	2	2	2	2	2	2	2	2	2	2	2	2	2	2	2	2	2	2	2	2	2	1	7	1	2	2	2	2	3	1	11	2	1	2	2
319	1	1	1	2	4	4	3	2	1	10	3	1	1	2	3	2	2	2	2	2	2	2	2	2	2	2	2	2	2	2	2	2	2	2	2	1	7	1	2	2	2	2	2	2	10	1	1	1	2
607	1	1	1	4	7	4	4	2	2	3	1	2	2	2	2	2	2	2	2	2	2	2	2	2	2	2	2	2	2	2	2	2	2	2	2	1	1	1	2	1	2	1	1	1	7	1	1	1	2
635	2	1	1	5	10	3	3	1	1	11	3	2	3	1	2	2	2	1	2	2	2	2	2	2	2	2	2	2	2	2	2	2	2	1	2	1	7	3	3	3	3	3	3	1		1	1	1	2
591	1	1	1	4	6	4	4	2	2	7	2	2	3	2	3	2	2	1	2	2	1	2	2	2	2	2	2	2	2	2	2	2	2	2	2	1	1	1	2	2	2	2	1	1	9	1	1	2	2
12	2	1	1	4	4	3	4	1	2	2	1	3	4	1	1	2	2	1	2	2	2	2	2	2	2	2	2	2	2	2	2	2	2	1	2	1	1	1	2	2	2	2	2	2	10	1	1	2	2
205	1	1	1	1	52	3	3	1	1	10	3	2	3	2	4	2	2	2	2	2	2	2	2	2	2	2	2	2	2	2	2	2	2	2	2	1	2	2	1	1	1	2	2	1	7	1	1	2	2
1109	1	2	1	3	5	4	4	2	2	11	3	3	4	2	1	2	2	2	2	2	2	2	2	2	2	2	2	2	2	2	2	2	2	2	2	1	4	1	2	2	2	2	2	2	10	1	1	2	2
603	1	1	1	5	10	4	4	2	2	6	2	2	3	1	3	1	1	1	2	2	2	2	2	2	2	2	2	2	2	2	2	2	2	1	2	1	4	3	3	2	2	3	2	1		5	1	1	2
1464	1	2	1	1	7	3	2	1	1	11	3	3	4	2	1	1	1	1	2	2	2	2	2	2	2	2	2	2	2	2	2	2	2	1	2	1	1	1	2	1	1	1	1	1	6	4	1	1	2
1501	1	2	1	5	7	4	4	2	2	10	3	3	4	1	4	1	1	1	1	2	2	2	2	2	2	2	2	2	1	2	2	2	2	2	2	1	2	2	1	2	2	1	1	1	7	4	1	1	2
317	2	1	1	1	1	4	2	2	1	11	3	2	3	1	3	1	1	1	1	2	2	2	2	2	2	1	2	2	1	2	2	2	2	2	2	1	1	2	1	2	2	1	1	1	7	3	1	1	2
498	2	1	1	5	10	4	4	2	2	8	2	2	3	1	4	1	1	1	2	2	2	2	2	2	2	2	2	2	2	2	1	2	2	2	2	1	1	1	2	2	1	2	2	1	9	3	1	1	2
278	2	1	1	1	1	4	2	2	1	11	3	2	3	1	3	1	1	1	1	2	2	2	2	2	2	1	2	2	1	2	2	2	2	2	2	1	1	2	1	2	2	1	1	1	7	3	1	2	2
350	1	1	1	5	10	3	3	1	1	4	1	3	4	2	4	1	1	1	1	1	1	1	2	2	2	1	2	2	1	1	1	2	2	2	2	1	1	2	1	2	2	1	1	1	7	2	1	2	2
1047	1	1	1	2	21	1	1	1	1	2	1	4	5	1	1	1	1	1	2	2	2	2	2	2	2	2	2	2	2	2	1	2	2	2	2	1	1	1	2	1	1	1	1	1	6	1	1	1	2
703	1	1	1	4	11	4	4	2	2	4	1	1	1	2	4	1	1	1	2	1	2	2	2	2	2	1	2	2	1	2	1	2	2	2	2	1	1	1	2	2	2	1	1	1	8	1	1	2	2
1370	1	2	1	5	20	4	3	2	1	9	3	3	4	2	1	1	2	1	2	2	2	2	2	2	2	2	2	2	2	2	1	2	2	2	2	1	1	1	2	1	1	1	1	1	6	6	2	2	2
983	1	1	1	5	10	1	4	1	2	11	3	3	4	2	2	1	2	1	2	2	1	2	2	2	2	2	2	2	2	2	1	2	2	2	2	1	4	1	2	3	1	3	2	1	11	5	1	2	2
1703	1	2	1	4	6	3	3	1	1	7	2	3		1	3	2	1	1	2	2	2	2	2	2	2	2	2	2	2	2	2	2	2	2	2	2	2	2	1	2	2	3	3	1	11	2	1	2	2
1664	1	2	1	1	4	3	4	1	2	7	2	1	1	2	3	4	2		2	2	2	2	2	2	2	2	2	2	2	2	2	2	2	2	2	2	2	1	2	2	2	2	2	2	10	2	1	1	2
1556	1	2	1	4	4	4	4	2	2	6	2	3		1	1	4	2	2	2	2	2	2	2	2	2	2	2	2	2	2	2	2	2	2	2	2	7	1	2	2	2	2	2	2	10	1	1	1	2
1717	1	2	1	4	4	3	4	1	2	4	1	2		2	2	3	1	1	2	2	2	2	2	2	2	2	2	2	2	2	2	2	2	1	2	2	2	1	2	2	2	2	2	2	10	2	1	2	2
1712	1	2	1	5	11	4	4	2	2	5	1	4		2	1	3	1	1	2	1	2	2	2	2	2	2	2	2	2	2	2	2	2	2	2	2	1	1	2	2	2	2	2	2	10	1	1	1	2
1553	1	2	1	4	4	3	4	1	2	5	1	2		1	2	3	2		2	2	2	2	2	2	2	2	2	2	2	2	2	2	2	2	2	2	7	1	2	2	2	2	2	2	10	2	1	1	2
1620	1	2	1	3	4	2	2	1	1	10	3	3		2	3	3	2		2	2	2	2	2	2	2	2	2	2	2	2	2	2	2	2	2	2	2	3	3	2	2	2	2	1		2	1	1	2
1562	1	2	1	4	4	4	4	2	2	10	3	3		1	2	3	2		1	1	1	2	2	2	2	1	2	2	1	2	2	2	2	2	2	2	1	3	3	2	2	2	2	1		2	1	2	2
1658	1	2	1	2	7	3	4	1	2	6	2	2		1	3	3	2		2	2	2	2	2	2	2	2	2	2	2	2	2	2	2	2	2	2	2	1	2	2	2	2	2	2	10	2	1	2	2
1689	1	2	1	4	4	3	4	1	2	10	3	2		1	2	3	2	2	2	2	2	2	2	2	2	2	2	2	2	2	2	2	2	2	2	2	1	1	2	2	2	2	2	2	10	1	1	1	2
1608	1	2	1	4	4	4	4	2	2	10	3	3		2	2	3	2	2	2	2	2	2	2	2	2	2	2	2	2	2	2	2	2	2	2	2	1	3	3	2	2	2	2	1		1	1	1	2
1716	1	2	1	4	4	4	3	2	1	9	3	2		2	1	3	2	2	2	2	2	2	2	2	2	2	2	2	2	2	2	2	2	2	2	2	2	1	2	2	2	2	2	2	10	1	1	1	2
1683	1	2	1	2	4	4	4	2	2	11	3	3		2	2	3	2	2	2	2	2	2	2	2	2	2	2	2	2	2	2	2	2	1	2	2	2	3	3	2	2	2	2	1		1	1	2	2
1599	1	2	1	3	4	4	4	2	2	6	2	2		2	3	2	1	1	2	2	2	2	2	2	2	1	2	2	2	2	2	2	2	2	2	2	3	2	1	2	1	3	1	1	8	5	1	2	2
1715	1	2	1	4	4	4	4	2	2	10	3	1		1	4	2	1		1	1	1	2	2	2	2	1	2	2	2	2	2	2	2	2	2	2	2	3	3	2	2	2	2	1		4	1	2	2
1581	1	2	1	4	4	3	4	1	2	10	3	3		2	3	2	1	1	1	2	1	2	2	1	2	1	2	2	2	2	2	2	2	2	2	2	1	2	1	1	2	1	2	1	7	3	1	1	2
1669	1	2	1	4	4	2	4	1	2	5	1	3		2	2	2	1	1	2	2	2	2	1	2	2	2	2	2	2	2	2	2	2	2	2	2	1	1	2	2	2	1	1	1	8	2	1	1	2
1670	1	2	1	4	4	2	4	1	2	5	1	3		2	2	2	1	1	2	2	2	2	1	2	2	2	2	2	2	2	2	2	2	2	2	2	1	1	2	2	2	1	1	1	8	2	1	1	2
1559	1	2	1	1	4	4	4	2	2	6	2	3		1	3	2	1	1	1	2	2	2	2	2	2	2	2	2	2	2	2	2	2	2	2	2	1	1	2	2	2	1	1	1	8	1	1	1	2
1626	1	2	1	4	4	4	3	2	1	8	2	3		2	2	2	1	1	2	2	2	2	2	2	2	2	1	2	2	2	2	2	2	2	2	2	4	2	1	2	2	2	2	1	9	1	1	1	2
1649	1	2	1	4	6	4	4	2	2	9	3	3		2	3	2	1	1	2	2	1	1	2	2	2	2	2	2	2	2	1	2	2	2	2	2	2	2	1	2	2	2	2	1	9	1	1	1	2
1538	1	2	1	4	4	4	4	2	2	4	1	1		2	1	2	1	1	2	2	2	2	2	2	2	2	2	1	2	2	2	2	2	2	2	2	7	1	2	1	2	2	2	1	9	1	1	1	2
1540	1	2	1	4	4	4	4	2	2	4	1	1		2	1	2	1	1	2	2	2	2	2	2	2	2	2	1	2	2	2	2	2	2	2	2	7	1	2	1	2	2	2	1	9	1	1	1	2
1656	1	2	1	4	6	3	4	1	2	8	2	3	3	1	3	2	1	1	1	2	2	2	2	2	2	2	2	2	2	2	2	2	2	2	2	2	2	1	2	2	2	2	1	1	9	1	1	2	2
1543	1	2	1	4	4	4	4	2	2	11	3	3		2	3	2	2		2	2	2	2	2	2	2	2	2	2	2	2	2	2	2	2	2	2	7	2	1	2	1	2	2	1	8	2	1	1	2
1596	1	2	1	4	4	2	4	1	2	7	2	3		1	2	2	2		2	2	2	2	2	2	2	2	2	2	2	2	2	2	2	2	2	2	2	1	2	2	2	2	2	2	10	2	1	1	2
1593	1	2	1	4	4	3	3	1	1	6	2	4		2	3	2	2	2	2	2	2	2	2	2	2	2	2	2	2	2	2	2	2	2	2	2	2	1	2	2	2	1	2	1	9	1	1	2	2
1673	1	2	1	2	4	4	4	2	2	6	2	1		2	4	1	1	1	2	2	2	2	2	2	2	1	2	2	2	2	2	2	2	2	2	2	4	2	1	2	2	1	1	1	7	3	1	2	2
1674	1	2	1	2	4	2	3	1	1	5	1	3		2	4	1	1	1	1	2	1	2	2	2	2	1	2	2	2	2	1	2	2	2	2	2		3	3	2	2	1	1	1		2	1	1	2
1647	1	2	1	5	10	4	3	2	1	3	1	2		1	4	1	2		2	2	2	2	2	2	2	2	2	2	2	2	2	2	2	2	2	2	2	2	1	1	1	1	1	1	5	2	1	2	2
1625	1	2	1	2	4	2	2	1	1	6	2	2		2	4	1	2		2	2	2	2	2	2	2	2	2	2	2	2	2	2	2	2	2	2	7	2	1	2	1	1	1	1	6	2	1	2	2
295	1	3	1	4	4	3	4	1	2	10	3	4	5	1	2	2	1	1	2	2	2	1	2	2	2	2	2	2	2	2	2	2	2	2	2	2	7	3	3	2	2	2	2	1		3	1	1	2
701	2	1	1	4	6	4	3	2	1	11	3	3	4	2	3	4	2	2	2	2	2	2	2	2	2	2	2	2	2	2	2	2	2	2	2	2	1	3	3	3	3	2	2	1		2	1	2	2
1309	1	2	1	5	10	4	4	2	2	11	3	1	1	2	1	4	2	2	2	2	2	2	2	2	2	2	2	2	2	2	2	2	2	2	2	2	7	1	2	2	2	2	2	2	10	2	1	2	2
1311	1	2	1	5	10	4	4	2	2	9	3	2	2	2	1	4	2	2	2	2	2	2	2	2	2	2	2	2	2	2	2	2	2	2	2	2	7	3	3	2	2	2	2	1		1	1	2	2
428	1	1	1	5	10	4	4	2	2	5	1	1	1	1	2	4	1	1	2	1	2	2	2	2	2	2	2	2	2	2	2	2	2	2	2	2	7	2	1	2	2	2	2	1	9	3	1	1	2
1448	1	2	1	5	10	4	4	2	2	3	1	2	2	1	2	4	1	1	2	1	1	2	2	2	2	2	2	2	2	2	1	2	2	2	2	2	7	1	2	2	2	2	2	2	10	1	1	1	2
960	1	1	1	2	45	4	4	2	2	11	3	1	1	1	2	4	1	1	2	1	2	2	2	2	2	2	2	2	2	2	2	2	2	2	2	2	7	1	2	2	2	2	2	2	10	1	1	2	2
868	1	1	1	4	4	3	4	1	2	7	2	3	4	1	4	4	2	2	2	2	2	2	2	2	2	2	2	2	2	2	2	2	2	2	2	2	7	2	1	2	1	2	2	1	8	6	2	1	2
418	1	1	1	1	10	4	3	2	1	9	3	1	1	2	2	4	2	2	2	2	2	2	2	2	2	2	2	2	2	2	2	2	2	2	2	2	2	1	2	2	2	2	2	2	10	3	1	1	2
624	2	1	1	5	10	2	2	1	1	4	1	3	4	2	2	4	2	2	2	2	2	2	2	2	2	2	2	2	2	2	2	2	2	2	2	2	7	1	2	2	2	2	2	2	10	2	1	1	1
1129	1	2	1	1	8	4	4	2	2	5	1	1	1	1	2	4	2	2	2	2	2	2	2	2	2	2	2	2	2	2	2	2	2	2	2	2	2	1	2	2	2	2	2	2	10	2	1	1	1
1117	1	2	1	1	1	4	4	2	2	6	2	1	1	2	1	4	2	2	2	2	2	2	2	2	2	2	2	2	2	2	2	2	2	2	2	2	2	1	2	2	2	2	2	2	10	2	1	1	2
1057	1	1	1	4	7	4	3	2	1	4	1	2	2	1	1	4	2	2	2	2	2	2	2	2	2	2	2	2	2	2	2	2	2	2	2	2	7	1	2	2	2	2	2	2	10	2	1	1	2
379	1	1	1	4	11	4	4	2	2	3	1	2	3	2	2	4	2	2	2	2	2	2	2	2	2	2	2	2	2	2	2	2	2	2	2	2	7	1	2	2	2	2	2	2	10	2	1	1	2
789	2	3	1	4		4	2	2	1	4	1	4	5	2	1	4	2	2	2	2	2	2	2	2	2	2	2	2	2	2	2	2	2	2	2	2	7	1	2	2	2	2	2	2	10	2	1	1	2
1386	1	2	1	5	10	3	4	1	2	8	2	3	4	1	2	4	2	2	2	2	2	2	2	2	2	2	2	2	2	2	2	2	2	2	2	2	1	1	2	2	2	2	2	2	10	2	1	2	1
981	1	1	1	5	30	2	1	1	1	7	2	1	1	2	1	4	2	2	2	2	2	2	2	2	2	2	2	2	2	2	2	2	2	2	2	2	2	1	2	2	2	2	2	2	10	2	1	2	2
1068	1	1	1	3	19	3	4	1	2	4	1	4	5	2	1	4	2	2	2	2	2	2	2	2	2	2	2	2	2	2	2	2	2	2	2	2	7	1	2	2	2	2	2	2	10	2	1	2	2
53	2	1	1	3	26	4	4	2	2	2	1	2	3	1	2	4	2	1	2	2	2	2	2	2	2	2	2	2	2	2	2	2	2	1	2	2	7	1	2	1	3	2	2	1	10	2	1	2	2
1452	1	2	1	5	10	4	4	2	2	8	2	2	3	1	1	4	2	2	2	2	2	2	2	2	2	2	2	2	2	2	2	2	2	2	2	2	7	3	3	2	3	2	2	1		2	1	2	2
709	1	1	1	3	2	4	4	2	2	7	2	4	5	1	1	4	2	2	2	2	2	2	2	2	2	2	2	2	2	2	2	2	2	2	2	2	7	1	2	2	2	2	2	2	10	2	1	2	2
1349	1	2	1	5	10	4	4	2	2	6	2	2	3	1	2	4	2	2	2	2	2	2	2	2	2	2	2	2	2	2	2	2	2	2	2	2	7	1	2	2	2	2	2	2	10	2	1	2	2
1032	2	3	1	2	62	3	3	1	1	9	3	1	1	2	3	4	2	2	2	2	2	2	2	2	2	2	2	2	2	2	2	2	2	2	2	2	7	1	2	2	2	2	2	2	10	1	1	2	2
1440	1	2	1	4	4	4	4	2	2	3	1	2	3	1	1	4	2	2	2	2	2	2	2	2	2	2	2	2	2	2	2	2	2	2	2	2	7	1	2	2	2	2	2	2	10	1	1	2	2
801	2	1	1	5	67	2	2	1	1	10	3	3	4	1	1	4	2	2	2	2	2	2	2	2	2	2	2	2	2	2	2	2	2	2	2	2	7	1	2	2	2	2	2	2	10	1	1	2	2
1037	2	1	1	5	40	4	4	2	2	11	3	3	4	1	1	4	2	2	2	2	2	2	2	2	2	2	2	2	2	2	2	2	2	2	2	2	7	1	2	3	2	2	2	1	11	1	1	2	2
1376	1	2	1	1	1	4	4	2	2	6	2	3	4	1	1	4	2	2	2	2	2	2	2	2	2	2	2	2	2	2	2	2	2	2	2	2	7	1	2	2	2	2	2	2	10	1	1	2	2
1398	1	2	1	4	4	3	3	1	1	10	3	2	2	2	3	3	1	1	1	2	2	2	2	2	2	2	2	2	2	2	2	2	2	2	2	2	3	1	2	2	2	2	2	2	10	5	1	1	2
598	1	1	1	5	10	2	2	1	1	10	3	3	4	1	2	3	1	1	2	1	1	2	2	2	2	2	2	2	2	2	2	2	2	2	2	2	1	1	2	2	2	2	2	2	10	5	1	1	2
863	1	1	1	5	34	4	4	2	2	8	2	3	4	1	3	3	1	1	2	2	2	2	2	2	2	2	2	2	2	2	2	2	2	1	2	2	1	1	2	2	2	2	2	2	10	5	1	1	2
352	1	1	1	1	46	4	4	2	2	10	3	1	1	1	3	3	1	1	2	1	1	2	2	2	2	2	2	2	2	2	2	2	2	2	2	2	2	2	1	2	1	2	2	1	8	5	1	1	2
1166	1	2	1	5	18	4	4	2	2	6	2	3	4	1	2	3	1	1	1	2	2	2	2	2	2	2	2	2	2	2	2	2	2	2	2	2	2	1	2	2	2	2	1	1	9	4	1	1	2
1494	1	2	1	3	2	4	4	2	2	4	1	1	1	1	2	3	1	1	2	2	1	1	2	2	2	2	2	2	2	2	2	2	2	2	2	2	7	1	2	2	2	2	2	2	10	4	1	2	2
843	1	3	1	3	14	4	4	2	2	4	1	1	1	2	3	3	1	1	2	2	2	2	2	2	2	2	1	2	2	2	1	2	2	2	2	2	1	1	2	2	1	1	1	1	7	4	1	2	2
415	1	1	1	4	10	4	4	2	2	7	2	1	1	2	3	3	1	1	2	2	1	2	2	2	2	2	2	2	2	2	2	2	2	2	2	2	2	1	2	2	2	2	2	2	10	3	1	1	2
1147	1	2	1	5	10	4	4	2	2	4	1	2	3	2	3	3	1	1	2	2	2	2	2	2	2	2	2	2	2	2	1	2	2	2	2	2	2	2	1	2	2	3	2	1	10	3	1	1	2
1212	1	2	1	4	4	4	4	2	2	6	2	1	1	2	3	3	1	1	2	2	2	2	2	2	2	2	2	2	2	2	2	2	2	1	2	2	2	1	2	2	2	1	1	1	8	3	1	1	2
510	1	1	1	5	72	4	4	2	2	8	2	3	4	2	3	3	1	1	2	2	2	2	2	2	2	1	2	2	2	1	2	2	2	2	2	2	6	1	2	2	2	2	2	2	10	3	1	2	2
941	1	1	1	4	11	4	4	2	2	4	1	1	1	1	3	3	1	1	2	1	2	2	2	2	2	2	2	2	2	2	2	2	2	2	2	2	7	1	2	2	2	2	2	2	10	3	1	2	2
584	1	1	1	5	10	4	4	2	2	5	1	3	4	1	3	3	1	1	2	1	1	2	2	2	2	2	2	2	2	2	2	2	2	1	2	2	2	2	1	2	2	2	2	1	9	3	1	2	2
566	1	1	1	4	7	3	3	1	1	4	1	3	4	1	3	3	1	1	2	2	2	2	2	2	2	2	2	2	2	2	2	2	2	1	2	2	5	1	2	2	2	2	2	2	10	2	1	1	2
1024	2	1	1	1	7	4	1	2	1	6	2	3	4	2	3	3	1	1	2	2	2	2	2	2	2	1	1	2	2	2	2	2	2	2	2	2	4	2	1	2	2	2	1	1	8	2	1	1	2
850	1	1	1	4	6	2	2	1	1	11	3	3	4	1	4	3	1	2	2	2	2	2	2	2	2	2	2	2	2	2	2	2	2	2	2	2	2	1	2	2	1	1	1	1	7	2	1	1	2
1053	1	1	1	2	49	4	4	2	2	5	1	1	1	2	1	3	1	1	2	2	2	2	2	2	2	2	2	2	2	2	2	2	2	1	2	2	2	1	2	2	2	2	2	2	10	2	1	2	2
892	1	1	1	4	4	4	4	2	2	7	2	1	1	2	3	3	1	1	2	1	2	2	2	2	2	2	2	2	2	2	2	2	2	2	2	2	2	1	2	2	2	2	2	2	10	2	1	2	2
67	1	1	1	4	4	4	4	2	2	6	2	2	2	2	2	3	1	1	1	2	2	2	2	2	2	2	2	2	2	2	2	2	2	2	2	2	1	1	2	2	2	2	2	2	10	2	1	2	2
645	1	1	1	3	10	4	4	2	2	6	2	3	4	2	2	3	1	1	2	2	1	2	2	2	2	2	2	2	2	2	2	2	2	2	2	2	2	1	2	2	2	2	2	2	10	2	1	2	2
405	1	1	1	2	45	4	4	2	2	9	3	1	1	1	2	3	1	1	2	2	2	2	2	2	2	2	2	2	2	2	2	2	2	1	2	2	7	2	1	2	2	2	2	1	9	2	1	2	2
69	1	1	1	4	4	4	4	2	2	6	2	4	5	2	2	3	1	1	1	2	2	2	2	2	2	2	2	2	2	2	2	2	2	2	2	2	1	1	2	1	2	2	2	1	9	2	1	2	2
404	1	1	1	5	10	4	4	2	2	10	3	1	1	2	2	3	1	1	2	2	1	2	2	2	2	2	2	2	2	2	2	2	2	2	2	2	7	2	1	1	3	2	2	1	9	2	1	2	2
1383	1	2	1	2	10	3	4	1	2	7	2	3	4	2	2	3	1	1	1	2	2	2	2	2	2	2	2	2	1	2	2	2	2	2	2	2	1	3	3	2	2	2	2	1		2	1	2	2
907	1	1	1	2	49	4	3	2	1	4	1	3	4	2	2	3	1	1	1	2	2	2	2	2	2	2	2	2	2	2	2	2	2	2	2	2	2	1	2	2	2	2	2	2	10	1	1	1	2
1014	2	1	1	5	32	4	4	2	2	5	1	1	1	1	3	3	1	1	2	2	2	2	2	2	2	2	2	2	2	2	2	2	2	1	2	2	2	2	1	2	3	2	2	1	10	1	1	2	2
676	2	1	1	1	4	4	3	2	1	5	1	3	4	1	2	3	1	1	2	2	2	1	2	2	2	2	2	2	2	2	2	2	2	2	2	2	1	1	2	2	2	2	2	2	10	1	1	2	2
119	1	1	1	4	12	3	4	1	2	8	2	3	4	2	2	3	1	1	1	1	2	2	2	2	2	2	2	2	2	2	2	2	2	2	2	2	2	1	2	2	2	2	2	2	10	1	1	2	2
1314	1	2	1	4	7	4	4	2	2	6	2	4	5	2	3	3	1	1	2	2	2	1	2	2	2	2	2	2	2	2	2	2	2	2	2	2	4	1	2	2	2	2	2	2	10	1	1	2	2
855	2	1	1	3	19	4	2	2	1	11	3	3	4	2	3	3	1	1	2	1	2	2	2	2	2	2	2	2	2	2	2	2	2	2	2	2	2	2	1	2	2	2	2	1	9	1	1	2	2
178	1	1	1	1	1	2	2	1	1	11	3	3	4	2	3	3	2	2	2	2	2	2	2	2	2	2	2	2	2	2	2	2	2	2	2	2	1	1	2	2	2	2	2	2	10	6	2	1	2
1094	1	1	1	1	2	4	4	2	2	8	2	3	4	2	3	3	2	2	2	2	2	2	2	2	2	2	2	2	2	2	2	2	2	2	2	2	2	1	2	2	2	2	2	2	10	6	2	2	2
705	2	1	1	3	2	4	2	2	1	11	3	2	3	1	2	3	2	2	2	2	2	2	2	2	2	2	2	2	2	2	2	2	2	2	2	2	2	3	3	2	2	2	2	1		5	1	1	2
359	1	1	1	5	10	4	4	2	2	10	3	1	1	1	3	3	2	2	2	2	2	2	2	2	2	2	2	2	2	2	2	2	2	2	2	2	1	1	2	2	2	2	2	2	10	4	1	2	2
745	2	1	1	5		3	3	1	1	7	2	2	3	2	3	3	2	2	2	2	2	2	2	2	2	2	2	2	2	2	2	2	2	2	2	2	2	1	2	2	2	2	2	2	10	3	1	1	2
1325	1	2	1	5	10	4	4	2	2	2	1	2	2	2	1	3	2	2	2	2	2	2	2	2	2	2	2	2	2	2	2	2	2	2	2	2	7	1	2	2	2	2	2	2	10	3	1	1	2
1093	1	1	1	3	5	4	4	2	2	11	3	1	1	1	1	3	2	2	2	2	2	2	2	2	2	2	2	2	2	2	2	2	2	2	2	2	7	1	2	3	2	2	2	1	11	3	1	1	2
1060	1	1	1	1	59	2	2	1	1	7	2	3	4	2	3	3	2	2	2	2	2	2	2	2	2	2	2	2	2	2	2	2	2	2	2	2	7	2	1	2	2	2	2	1	9	3	1	2	2
1463	1	2	1	1	38	4	4	2	2	10	3	2	3	1	3	3	2	2	2	2	2	2	2	2	2	2	2	2	2	2	2	2	2	2	2	2	1	3	3	2	2	2	2	1		3	1	2	2
854	2	1	1	1	1	4	4	2	2	11	3	3	4	2	2	3	2	2	2	2	2	2	2	2	2	2	2	2	2	2	2	2	2	2	2	2		1	2	2	2	2	2	2	10	3	1	2	2
1455	1	2	1	5	10	4	4	2	2	3	1	4	5	2	1	3	2	2	2	2	2	2	2	2	2	2	2	2	2	2	2	2	2	2	2	2	7	1	2	2	2	2	2	2	10	2	1	1	2
1337	1	2	1	2	45	4	4	2	2	6	2	1	1	2	2	3	2	2	2	2	2	2	2	2	2	2	2	2	2	2	2	2	2	2	2	2	2	1	2	2	2	2	2	2	10	2	1	1	2
450	1	1	1	5	10	4	4	2	2	5	1	2	2	2	1	3	2	2	2	2	2	2	2	2	2	2	2	2	2	2	2	2	2	2	2	2	7	1	2	2	2	2	2	2	10	2	1	1	2
19	1	1	1	4	4	4	4	2	2	10	3	3	4	1	2	3	2	1	2	2	2	2	2	2	2	2	2	2	2	2	2	2	2	1	2	2	7	1	2	2	2	2	2	2	10	2	1	1	2
932	1	3	1	1	1	4	4	2	2	8	2	3	4	2	2	3	2	2	2	2	2	2	2	2	2	2	2	2	2	2	2	2	2	2	2	2	1	1	2	2	2	2	2	2	10	2	1	1	2
1352	1	2	1	5	10	3	3	1	1	4	1	4	5	2	2	3	2	2	2	2	2	2	2	2	2	2	2	2	2	2	2	2	2	2	2	2		1	2	2	2	2	2	2	10	2	1	1	2
269	1	1	1	4	4	4	3	2	1	11	3	4	5	1	1	3	2	2	2	2	2	2	2	2	2	2	2	2	2	2	2	2	2	2	2	2	2	1	2	2	2	2	2	2	10	2	1	1	2
620	1	1	1	4	4	4	3	2	1	8	2	1	1	1	5	3	2	2	2	2	2	2	2	2	2	2	2	2	2	2	2	2	2	2	2	2	4	3	3	2	2	1	1	1		2	1	1	2
818	1	1	1	5	10	4	4	2	2	6	2	2	2	2	1	3	2	2	2	2	2	2	2	2	2	2	2	2	2	2	2	2	2	2	2	2	7	1	2	2	2	2	2	2	10	2	1	1	2
1350	1	2	1	5	10	4	4	2	2	6	2	1	1	2	2	3	2	2	2	2	2	2	2	2	2	2	2	2	2	2	2	2	2	2	2	2	7	1	2	2	2	2	2	2	10	2	1	2	2
82	1	1	1	4	4	4	4	2	2	5	1	1	1	2	3	3	2	1	2	2	2	2	2	2	2	2	2	2	2	2	2	2	2	1	2	2	1	1	2	2	2	2	2	2	10	2	1	2	2
24	1	1	1	4	12	4	4	2	2	7	2	1	1	1	3	3	2	1	2	2	2	2	2	2	2	2	2	2	2	2	2	2	2	1	2	2	2	1	2	2	2	2	2	2	10	2	1	2	2
1301	1	2	1	5	10	2	2	1	1	5	1	2	3	2	1	3	2	2	2	2	2	2	2	2	2	2	2	2	2	2	2	2	2	2	2	2	7	1	2	2	2	2	2	2	10	2	1	2	2
1070	1	1	1	3	19	4	4	2	2	7	2	2	3	1	2	3	2	2	2	2	2	2	2	2	2	2	2	2	2	2	2	2	2	2	2	2	2	1	2	2	2	2	2	2	10	2	1	2	2
813	2	1	1	5	4	4	4	2	2	11	3	2	3	2	1	3	2	2	2	2	2	2	2	2	2	2	2	2	2	2	2	2	2	2	2	2	7	1	2	2	2	2	2	2	10	2	1	2	2
1045	1	1	1	2	49	3	3	1	1	4	1	3	4	1	2	3	2	2	2	2	2	2	2	2	2	2	2	2	2	2	2	2	2	2	2	2	7	1	2	2	2	2	2	2	10	2	1	2	2
604	2	1	1	5	10	4	4	2	2	9	3	3	4	1	3	3	2	2	2	2	2	2	2	2	2	2	2	2	2	2	2	2	2	2	2	2	2	1	2	2	2	2	2	2	10	2	1	2	2
1351	1	2	1	5	10	4	4	2	2	2	1	4	5	2	2	3	2	2	2	2	2	2	2	2	2	2	2	2	2	2	2	2	2	2	2	2	7	1	2	2	2	2	2	2	10	2	1	2	2
617	2	1	1	5	10	4	4	2	2	7	2	1	1	2	2	3	2	1	1	2	2	2	2	2	2	2	2	2	2	2	2	2	2	2	2	2	1	1	2	2	2	2	2	2	10	2	1	2	2
1392	1	2	1	4	12	4	4	2	2	7	2	1	1	1	2	3	2	1	2	2	2	2	2	2	2	2	2	2	2	2	2	2	2	1	2	2	2	1	2	2	2	2	2	2	10	2	1	2	2
1297	1	2	1	5	10	4	4	2	2	3	1	2	3	1	2	3	2	2	2	2	2	2	2	2	2	2	2	2	2	2	2	2	2	2	2	2	7	3	3	2	2	2	2	1		2	1	2	2
501	1	1	1	5	10	3	4	1	2	11	3	3	4	2	3	3	2	2	2	2	2	2	2	2	2	2	2	2	2	2	2	2	2	2	2	2	7	3	3	2	2	2	2	1		2	1	2	2
1498	1	2	1	1	44	4	4	2	2	10	3	1	1	2	2	3	2	2	2	2	2	2	2	2	2	2	2	2	2	2	2	2	2	2	2	2	1	1	2	2	2	2	2	2	10	2	1	2	2
814	2	1	1	3	19	4	4	2	2	5	1	4	5	2	1	3	2	2	2	2	2	2	2	2	2	2	2	2	2	2	2	2	2	2	2	2	7	1	2	2	2	2	2	2	10	1	1	1	1
209	1	3	1	2		4	4	2	2	8	2	1	1	1	2	3	2	2	2	2	2	2	2	2	2	2	2	2	2	2	2	2	2	2	2	2	2	1	2	2	2	2	2	2	10	1	1	1	2
383	1	1	1	5	10	4	3	2	1	4	1	2	2	2	2	3	2	2	2	2	2	2	2	2	2	2	2	2	2	2	2	2	2	2	2	2	7	1	2	2	2	2	2	2	10	1	1	1	2
899	2	1	1	5	10	4	4	2	2	5	1	4	5	2	1	3	2	2	2	2	2	2	2	2	2	2	2	2	2	2	2	2	2	2	2	2	3	1	2	2	2	2	2	2	10	1	1	1	2
970	1	1	1	4	7	4	4	2	2	8	2	1	1	1	2	3	2	2	2	2	2	2	2	2	2	2	2	2	2	2	2	2	2	2	2	2	2	1	2	2	2	2	2	2	10	1	1	1	2
1334	1	2	1	4	4	3	4	1	2	5	1	2	2	2	2	3	2	2	2	2	2	2	2	2	2	2	2	2	2	2	2	2	2	2	2	2	2	1	2	2	2	2	2	2	10	1	1	1	2
716	1	1	1	4		4	4	2	2	8	2	2	3	2	1	3	2	2	2	2	2	2	2	2	2	2	2	2	2	2	2	2	2	2	2	2	7	1	2	2	2	2	2	2	10	1	1	1	2
608	2	1	1	5	10	3	4	1	2	11	3	4	5	2	3	3	2	1	2	2	2	2	2	2	2	2	2	2	2	2	1	2	2	2	2	2	2	1	2	2	2	2	2	2	10	1	1	1	2
118	1	1	1	4	4	4	4	2	2	11	3	4	5	1	2	3	2	1	2	2	2	2	2	2	2	2	2	2	2	2	2	2	2	1	2	2	2	1	2	2	2	2	2	2	10	1	1	1	2
128	1	1	1	4	4	4	4	2	2	11	3	4	5	1	2	3	2	1	2	2	2	2	2	2	2	2	2	2	2	2	2	2	2	1	2	2	2	1	2	2	2	2	2	2	10	1	1	1	2
558	1	1	1	5	10	4	4	2	2	3	1	3	4	2	2	3	2	1	2	2	2	2	2	2	2	2	2	2	2	2	2	2	2	1	2	2	7	3	3	2	2	2	2	1		1	1	1	2
147	1	3	1	3	5	4	4	2	2	5	1	2	3	2	3	3	2	2	2	2	2	2	2	2	2	2	2	2	2	2	2	2	2	2	2	2	7	1	2	2	2	2	2	2	10	1	1	2	2
1031	2	1	1	4	22	1	1	1	1	11	3	3	4	1	2	3	2	2	2	2	2	2	2	2	2	2	2	2	2	2	2	2	2	2	2	2	7	1	2	2	2	2	2	2	10	1	1	2	2
419	1	1	1	5	10	4	4	2	2	8	2	4	5	1	2	3	2	2	2	2	2	2	2	2	2	2	2	2	2	2	2	2	2	2	2	2	2	1	2	2	2	2	2	2	10	1	1	2	2
803	1	1	1	5	10	4	4	2	2	10	3	4	5	2	2	3	2	2	2	2	2	2	2	2	2	2	2	2	2	2	2	2	2	2	2	2	7	1	2	2	2	2	2	2	10	1	1	2	2
104	1	1	1	4	4	4	4	2	2	11	3	4	5	1	2	3	2	1	2	2	2	2	2	2	2	2	2	2	2	2	2	2	2	1	2	2	2	1	2	2	2	2	2	2	10	1	1	2	2
794	2	3	1	2	62	1	1	1	1	11	3	3	4	2	2	3	2	2	2	2	2	2	2	2	2	2	2	2	2	2	2	2	2	2	2	2	3	2	1	2	1	2	2	1	8	1	1	2	2
1438	1	2	1	5	10	4	4	2	2	9	3	2	2	2	1	3	2	2	2	2	2	2	2	2	2	2	2	2	2	2	2	2	2	2	2	2	1	1	2	2	2	2	2	2	10	1	1	2	2
371	1	1	1	5	10	4	3	2	1	8	2	4	5	1	2	2	1	1	2	2	1	2	2	2	2	2	2	2	2	2	2	2	2	2	2	2	2	1	2	2	2	3	3	1	12	6	2	2	2
923	1	1	1	5	10	3	4	1	2	11	3	3	4	1	3	2	1	1	2	1	1	2	2	2	2	2	2	2	2	2	2	2	2	2	2	2	7	2	1	2	3	2	2	1	10	5	1	1	2
153	1	1	1	1	1	2	3	1	1	11	3	3	4	2	3	2	1	1	2	1	2	2	2	2	2	2	1	2	2	2	2	2	2	2	2	2	2	3	3	2	2	2	2	1		5	1	2	2
68	1	1	1	4	4	4	4	2	2	11	3	3	4	1	4	2	1	1	2	2	1	2	2	2	2	2	2	2	2	2	2	2	2	2	2	2	2	3	3	2	2	2	3	1		5	1	2	2
349	1	1	1	4	4	4	4	2	2	10	3	3	4	1	3	2	1	1	1	2	1	2	2	2	2	2	2	2	2	2	2	2	2	2	2	2	1	1	2	2	2	1	1	1	8	4	1	1	1
668	1	1	1	5	10	3	3	1	1	11	3	3	4	2	3	2	1	1	2	2	1	2	2	1	2	2	2	2	1	2	2	2	2	2	2	2	1	2	1	1	2	1	1	1	6	4	1	1	2
600	1	1	1	2	45	4	4	2	2	10	3	3	4	2	4	2	1	1	1	2	1	2	1	1	2	2	2	2	2	2	2	2	2	2	2	2	4	3	3	2	2	3	3	1		4	1	1	2
491	2	1	1	5	10	3	4	1	2	9	3	3	4	1	3	2	1	1	2	1	1	2	2	2	2	2	2	2	2	2	2	2	2	2	2	2	1	1	2	2	1	2	2	1	9	4	1	2	2
1419	1	2	1	2	49	4	4	2	2	11	3	3	4	2	3	2	1	1	1	1	2	2	2	2	2	2	2	2	2	2	2	2	2	2	2	2	2	1	2	2	2	1	2	1	9	4	1	2	2
320	1	1	1	4	6	4	4	2	2	11	3	3	4	1	3	2	1	1	2	1	1	2	2	2	2	2	2	2	2	2	2	2	2	2	2	2	2	3	3	2	2	2	2	1		3	1	1	2
1029	1	1	1	5	10	2	2	1	1	6	2	2	2	1	2	2	1	1	1	2	2	2	2	2	2	2	2	2	2	2	2	2	2	2	2	2	1	1	2	2	2	2	2	2	10	3	1	1	2
605	2	1	1	5	10	4	4	2	2	11	3	3	4	1	3	2	1	1	2	2	2	2	2	2	2	2	2	2	2	2	2	2	2	1	2	2	2	2	1	1	2	3	3	1	10	3	1	1	2
951	1	1	1	2	45	2	4	1	2	5	1	1	1	2	3	2	1	1	1	2	2	2	2	2	2	2	2	2	2	2	1	2	2	2	2	2	2	2	1	2	2	2	2	1	9	3	1	1	2
309	1	1	1	4	6	4	4	2	2	11	3	3	4	1	3	2	1	1	2	1	1	2	2	2	2	2	2	2	2	2	2	2	2	2	2	2	2	3	3	2	2	2	2	1		3	1	1	2
58	1	1	1	3	61	3	4	1	2	7	2	1	1	2	3	2	1	1	2	2	1	2	2	2	2	2	2	2	2	2	2	2	2	2	2	2	2	3	3	2	2	3	2	1		3	1	1	2
62	1	1	1	3	61	3	4	1	2	7	2	1	1	2	3	2	1	1	2	2	1	2	2	2	2	2	2	2	2	2	2	2	2	2	2	2	2	3	3	2	2	3	2	1		3	1	1	2
16	2	1	1	4	4	4	2	2	1	5	1	2	2	2	3	2	1	1	1	2	2	2	2	2	2	2	2	2	2	2	2	2	2	2	2	2	1	3	3	3	3	3	2	1		3	1	1	2
1507	1	2	1	4	11	4	4	2	2	7	2	2	3	1	3	2	1	1	1	2	2	2	2	2	2	2	2	2	2	2	1	2	2	2	2	2	1	1	2	2	2	2	2	2	10	3	1	2	2
1105	1	2	1	5	10	4	2	2	1	11	3	3	4	1	2	2	1	1	1	2	2	2	2	2	2	2	2	2	2	2	2	2	2	2	2	2	1	1	2	2	2	2	2	2	10	3	1	2	2
1509	1	2	1	1	46	3	2	1	1	6	2	3	4	2	3	2	1	1	1	2	2	2	2	2	2	2	2	2	2	2	2	2	2	2	2	2	4	1	2	2	2	2	2	2	10	3	1	2	2
638	2	1	1	5	10	4	4	2	2	10	3	3	4	1	3	2	1	1	2	1	1	2	2	2	2	2	2	2	2	2	2	2	2	2	2	2	7	2	1	1	1	2	2	1	7	3	1	2	2
485	1	1	1	5	10	4	4	2	2	7	2	1	1	1	3	2	1	1	1	1	2	2	2	2	2	2	2	2	1	2	2	2	2	2	2	2	2	2	1	2	2	2	2	1	9	3	1	2	2
1059	1	1	1	3	2	4	4	2	2	9	3	2	3	1	3	2	1	1	2	2	2	2	2	2	2	2	2	2	2	2	2	2	2	1	2	2	7	2	1	2	2	2	2	1	9	3	1	2	2
1163	1	2	1	1	8	4	4	2	2	5	1	1	1	2	4	2	1	1	2	1	2	2	2	2	1	1	2	1	2	2	2	2	2	2	2	2	2	2	1	3	1	1	1	1	7	3	1	2	2
710	2	1	1	2	49	1	2	1	1	4	1	2	3	2	4	2	1	1	2	1	1	2	2	2	2	1	2	2	1	2	2	1	2	2	2	2	2	2	1	3	1	2	2	1	9	3	1	2	2
1078	1	1	1	3	9	3	4	1	2	7	2	4	5	1	1	2	1	1	2	2	2	2	2	2	2	2	2	2	2	2	2	2	2	1	2	2	2	1	2	3	2	2	2	1	11	3	1	2	2
1471	1	2	1	1	52	3	3	1	1	10	3	2	3	2	3	2	1	1	2	2	1	2	2	2	2	2	2	2	2	2	2	2	2	2	2	2	2	3	3	2	2	2	1	1		3	1	2	2
514	1	3	1	5	10	4	4	2	2	11	3	2	3	1	4	2	1	1	2	2	1	2	2	2	2	2	2	2	2	2	2	2	2	2	2	2	7	3	3	2	2	2	2	1		3	1	2	2
1444	1	2	1	5	10	4	4	2	2	8	2	1	1	1	3	2	1	1	1	2	1	2	2	2	2	2	2	2	2	2	2	2	2	1	2	2	2	1	2	2	2	2	2	2	10	3	1	2	2
1402	1	4	1	4	4	3	4	1	2	9	3	2	2	1	3	2	1	1	2	2	2	2	2	2	2	2	2	2	2	2	1	2	2	1	2	2	2	1	2	2	2	1	2	1	9	3	1	2	2
107	1	1	1	4	4	4	4	2	2	11	3	3	4	2	2	2	1	1	2	2	1	2	2	2	2	2	2	2	2	2	2	2	2	2	2	2	7	1	2	2	2	2	2	2	10	2	1	1	2
431	1	1	1	5	7	4	4	2	2	7	2	1	1	2	3	2	1	1	2	2	1	2	2	2	2	2	2	2	2	2	2	2	2	2	2	2	2	1	2	2	2	2	2	2	10	2	1	1	2
270	1	1	1	5	10	4	4	2	2	10	3	2	3	2	2	2	1	2	2	2	2	2	2	2	2	2	2	2	2	2	2	2	2	2	2	2	2	1	2	2	2	2	2	2	10	2	1	1	2
1270	1	2	1	3	2	4	4	2	2	6	2	2	2	2	5	2	1	1	2	2	2	1	1	2	2	2	2	2	2	2	2	2	2	2	2	2	2	1	2	2	2	2	2	2	10	2	1	1	2
143	1	1	1	1	36	4	4	2	2	7	2	2	3	1	2	2	1	1	2	2	2	2	2	2	2	2	2	2	2	2	2	2	2	1	2	2	2	1	2	2	2	2	2	2	10	2	1	1	2
263	1	1	1	4	4	4	4	2	2	8	2	1	1	2	3	2	1	1	2	2	1	1	2	2	2	1	2	2	2	2	2	2	2	2	2	2	1	2	1	1	1	2	2	1	7	2	1	1	2
815	1	1	1	2	7	4	4	2	2	8	2	3	4	1	3	2	1	1	2	2	1	1	1	1	2	2	2	2	2	2	2	2	2	2	2	2	4	2	1	2	2	2	2	1	9	2	1	1	2
1190	1	2	1	4	4	3	4	1	2	8	2	3	4	1	3	2	1	1	1	2	2	2	2	2	2	2	2	2	2	2	2	2	2	2	2	2	1	2	1	2	2	2	3	1	10	2	1	1	2
1084	1	1	1	3	5	4	4	2	2	10	3	1	1	1	3	2	1	1	1	2	2	2	1	2	2	2	1	2	2	2	2	2	2	2	2	2	1	2	1	3	1	2	2	1	9	2	1	1	2
486	1	1	1	5	10	4	4	2	2	9	3	1	1	2	2	2	1	1	2	1	2	2	2	2	2	2	2	2	2	2	2	2	2	2	2	2	2	1	2	1	1	2	2	1	8	2	1	1	2
654	1	1	1	5	10	4	4	2	2	7	2	1	1	1	4	2	1	1	1	1	2	2	2	2	2	2	2	2	2	2	2	1	2	2	2	2	2	1	2	2	2	1	2	1	9	2	1	1	2
1303	1	2	1	5	10	4	3	2	1	7	2	3	4	1	4	2	1	1	2	1	2	2	2	2	2	2	2	2	2	2	2	2	2	2	2	2	2	3	3	2	2	2	2	1		2	1	1	2
177	1	1	1	1		4	4	2	2	8	2	2	3	2	4	2	1	2	2	2	2	2	2	2	2	2	2	2	2	2	2	2	2	2	2	2	2	2	1	2	2	2	2	1	9	2	1	2	2
947	2	1	1	4	4	2	3	1	1	2	1	4	5	2	3	2	1	2	2	2	2	2	2	2	2	2	2	2	2	2	2	2	2	2	2	2	1	2	1	3	3	3	3	1	13	2	1	2	2
1461	1	2	1	1	1	4	4	2	2	10	3	2	3	1	3	2	1	1	2	2	1	2	2	2	2	2	2	2	2	2	2	2	2	2	2	2	2	1	2	2	2	2	2	2	10	2	1	2	2
849	1	1	1	2	58	4	2	2	1	11	3	3	4	1	4	2	1	1	2	1	1	1	1	2	2	2	2	2	1	2	2	2	2	2	2	2	5	2	1	1	3	1	1	1	7	2	1	2	2
621	2	1	1	5	10	4	4	2	2	7	2	1	1	2	3	2	1	2	2	2	2	2	2	2	2	2	2	2	2	2	2	2	2	2	2	2	7	2	1	1	3	2	2	1	9	2	1	2	2
1512	1	2	1	4	4	4	3	2	1	3	1	2	3	1	3	2	1	1	1	1	2	2	1	2	2	1	2	1	2	2	2	2	2	1	2	2	2	2	1	2	2	1	1	1	7	2	1	2	2
302	1	3	1	4	11	2	2	1	1	11	3	3	4	2	3	2	1	1	2	1	2	2	2	2	2	2	2	2	2	2	2	2	2	1	2	2	2	2	1	2	2	2	2	1	9	2	1	2	2
276	1	1	1	2	10	4	4	2	2	7	2	3	4	1	4	2	1	1	2	1	2	2	1	2	2	2	2	2	2	2	2	2	2	2	2	2	2	2	1	2	2	2	2	1	9	2	1	2	2
390	2	1	1	3	10	3	3	1	1	11	3	3	4	2	5	2	1	1	1	1	1	1	2	2	2	1	2	2	2	2	1	2	2	2	2	2	1	2	1	3	2	1	1	1	8	2	1	2	2
595	1	1	1	5	10	4	4	2	2	4	1	1	1	2	2	2	1	1	1	2	2	2	2	2	2	1	2	2	2	2	2	2	2	2	2	2	2	1	2	2	2	1	1	1	8	2	1	2	2
687	2	1	1	5	10	4	4	2	2	11	3	3	4	1	2	2	1	1	2	2	1	2	2	2	2	2	2	2	2	1	2	2	2	2	2	2	2	3	3	1	2	2	2	1		2	1	2	2
816	2	3	1	3	2	3	4	1	2	7	2	1	1	2	1	2	1	1	1	2	2	2	2	2	2	2	2	2	2	2	2	2	2	2	2	2	7	3	3	3	2	2	2	1		2	1	2	2
1111	1	2	1	3	26	4	4	2	2	7	2	2	2	2	2	2	1	1	2	2	2	2	2	2	2	2	2	2	2	2	2	2	2	1	2	2	2	1	2	2	2	2	2	2	10	2	1	2	2
1246	1	2	1	4	4	4	4	2	2	4	1	4	5	1	4	2	1	1	1	2	1	2	2	2	2	2	2	2	1	1	2	2	2	2	2	2	2	2	1	2	1	1	2	1	7	2	1	2	2
1131	1	2	1	3	51	2	4	1	2	11	3	2	2	2	2	2	1	1	2	2	2	2	2	2	2	2	2	2	2	2	2	2	2	1	2	2	1	2	1	2	2	2	2	1	9	2	1	2	2
1110	1	2	1	2	49	2	1	1	1	10	3	3	4	2	2	2	1	1	2	2	1	1	2	2	2	2	2	2	2	2	2	2	2	2	2	2	2	3	3	2	2	2	2	1		2	1	2	2
8	1	1	1	4	4	4	4	2	2	8	2	3	4	2	2	2	1	1	2	2	2	2	1	2	2	2	2	2	2	2	2	2	2	1	2	2	3	2	1	2	2	2	2	1	9	1	1	1	2
985	1	1	1	2	62	4	4	2	2	6	2	1	1	1	3	2	1	1	2	2	2	2	2	2	2	1	2	2	2	2	2	2	2	2	2	2	2	1	2	2	2	2	2	2	10	1	1	1	2
1165	1	2	1	1	8	2	2	1	1	10	3	3	4	1	2	2	1	1	2	2	2	2	2	2	2	2	2	2	2	2	2	2	2	1	2	2	7	1	2	2	2	2	2	2	10	1	1	1	2
671	1	1	1	4	7	2	4	1	2	6	2	3	4	2	3	2	1	1	1	2	2	2	2	2	2	2	2	2	2	2	2	2	2	2	2	2	2	1	2	2	2	2	2	2	10	1	1	1	2
15	1	1	1	4	4	4	4	2	2	9	3	3	4	2	3	2	1	1	1	2	2	2	2	1	2	2	2	2	2	2	2	2	2	2	2	2	2	1	2	2	2	2	2	2	10	1	1	2	2
33	1	1	1	4	4	4	4	2	2	9	3	3	4	2	3	2	1	1	1	2	2	2	2	1	2	2	2	2	2	2	2	2	2	2	2	2	2	1	2	2	2	2	2	2	10	1	1	2	2
797	1	1	1	4	6	4	4	2	2	5	1	4	5	2	4	2	1	1	1	2	2	2	2	2	2	1	2	2	2	2	2	2	2	2	2	2	2	1	2	2	2	2	2	2	10	1	1	2	2
1219	1	2	2	3	5	4	3	2	1	11	3	3	4	1	3	2	1	1	2	2	2	2	2	2	2	2	2	2	2	2	2	2	2	1	2	2	7	2	1	1	1	1	1	1	5	1	1	2	2
2	1	1	1	4	4	4	4	2	2	8	2	3	4	2	2	2	1	1	2	2	2	2	1	2	2	2	2	2	2	2	2	2	2	1	2	2	3	2	1	2	2	2	2	1	9	1	1	2	2
1030	2	1	1	1	48	1	2	1	1	2	1	2	2	1	4	2	2	1	2	2	2	2	2	2	2	2	2	1	2	2	2	1	2	2	2	2	6	1	2	1	1	3	1	1	8	6	2	1	2
1289	1	2	1	2	45	4	2	2	1	2	1	3	4	2	2	2	2	1	2	2	2	2	2	2	2	2	2	2	1	2	2	2	2	2	2	2	1	1	2	2	2	3	2	1	11	6	2	1	2
91	1	1	1	4	7	4	3	2	1	9	3	3	4	1	2	2	2	1	2	1	1	2	2	2	2	2	2	2	2	2	2	2	2	2	2	2	2	1	2	2	2	2	2	2	10	5	1	2	2
1499	1	2	1	3	2	4	4	2	2	11	3	1	1	2	3	2	2	2	2	2	2	2	2	2	2	2	2	2	2	2	2	2	2	2	2	2	1	2	1	1	2	2	2	1	8	5	1	2	2
363	1	1	1	1	65	2	2	1	1	10	3	3	4	2	2	2	2	2	2	2	2	2	2	2	2	2	2	2	2	2	2	2	2	2	2	2	7	1	2	2	3	2	1	1	10	5	1	2	2
1208	1	2	1	5	10	3	4	1	2	6	2	3	4	1	3	2	2	2	2	2	2	2	2	2	2	2	2	2	2	2	2	2	2	2	2	2	2	3	3	2	1	1	1	1		5	1	2	2
728	2	1	1	5		2	4	1	2	5	1	4	5	1	3	2	2	1	2	1	1	2	2	2	2	2	2	2	1	2	2	2	2	2	2	2	2	1	2	2	2	1	1	1	8	4	1	1	2
1056	1	1	1	5	10	4	4	2	2	10	3	1	1	1	3	2	2	2	2	2	2	2	2	2	2	2	2	2	2	2	2	2	2	2	2	2	1	3	3	2	2	2	2	1		4	1	1	2
686	1	1	1	4	4	3	4	1	2	7	2	3	4	2	2	2	2	1	2	2	1	2	2	2	2	2	2	2	2	1	2	2	2	2	2	2	2	1	2	1	2	3	3	1	11	4	1	2	2
456	1	1	1	4	11	4	4	2	2	8	2	2	3	2	3	2	2	2	2	2	2	2	2	2	2	2	2	2	2	2	2	2	2	2	2	2	3	3	3	2	2	2	1	1		4	1	2	2
1533	1	4	1	1	46	3	3	1	1	8	2	3	4	2	3	2	2	1	2	2	1	2	2	2	2	2	2	2	2	2	2	2	2	2	2	2	7	1	2	2	2	2	2	2	10	4	1	2	2
1472	1	2	1	1	52	4	3	2	1	6	2	2	3	1	2	2	2	2	2	2	2	2	2	2	2	2	2	2	2	2	2	2	2	2	2	2	2	1	2	2	2	2	2	2	10	3	1	1	2
1256	1	2	1	3	2	4	4	2	2	8	2	3	4	2	3	2	2	2	2	2	2	2	2	2	2	2	2	2	2	2	2	2	2	2	2	2	1	1	2	2	2	2	2	2	10	3	1	2	2
56	2	1	1	5	10	2	2	1	1	11	3	3	4	2	2	2	2	1	2	2	2	2	2	2	2	2	2	2	2	2	2	2	2	1	2	2	2	1	2	2	2	1	2	1	9	2	1	1	2
275	1	1	1	1	46	3	2	1	1	6	2	3	4	2	3	2	2	1	2	2	2	2	2	2	2	2	2	2	2	2	2	2	2	1	2	2	4	1	2	2	2	2	2	2	10	2	1	1	2
248	1	1	1	2	4	4	4	2	2	11	3	3	4	2	3	2	2	2	2	2	2	2	2	2	2	2	2	2	2	2	2	2	2	2	2	2	2	1	2	2	2	2	2	2	10	2	1	2	1
280	1	1	1	5	10	3	2	1	1	2	1	3	4	1	2	2	2	1	1	2	2	2	2	2	2	2	2	2	2	2	2	2	2	2	2	2	1	1	2	2	2	2	2	2	10	2	1	2	2
847	2	1	1	3	2	4	3	2	1	8	2	3	4	1	2	2	2	2	2	2	2	2	2	2	2	2	2	2	2	2	2	2	2	2	2	2	6	1	2	2	2	2	2	2	10	2	1	2	2
384	1	3	1	4	11	3	3	1	1	7	2	3	4	1	2	2	2	2	2	2	2	2	2	2	2	2	2	2	2	2	2	2	2	2	2	2	7	1	2	2	2	2	2	2	10	2	1	2	2
1035	2	1	1	5	10	4	4	2	2	9	3	3	4	1	3	2	2	2	2	2	2	2	2	2	2	2	2	2	2	2	2	2	2	2	2	2	1	1	2	2	2	2	2	2	10	2	1	2	2
940	2	1	1	4	4	4	3	2	1	6	2	2	3	2	2	2	2	1	1	2	2	2	2	2	2	2	2	2	2	2	2	2	2	2	2	2	2	2	1	2	1	1	1	1	6	2	1	2	2
375	2	1	1	5	10	2	2	1	1	11	3	3	4	2	2	2	2	1	2	2	2	2	2	2	2	2	2	2	2	2	2	2	2	1	2	2	2	1	2	2	2	1	2	1	9	2	1	2	2
1511	1	2	1	1	36	2	1	1	1	4	1	2	2	1	1	2	2	1	2	2	2	2	2	2	2	1	2	2	2	2	2	2	2	2	2	2	1	1	2	3	2	2	1	1	10	2	1	2	2
1036	1	1	1	5	10	3	2	1	1	11	3	3	4	1	2	2	2	2	2	2	2	2	2	2	2	2	2	2	2	2	2	2	2	2	2	2	7	3	3	2	2	2	2	1		2	1	2	2
1013	1	1	1	2	49	3	4	1	2	11	3	2	3	2	2	2	2	2	2	2	2	2	2	2	2	2	2	2	2	2	2	2	2	2	2	2	2	1	2	2	2	2	2	2	10	2	1	2	2
1178	1	2	1	3	2	4	3	2	1	7	2	2	2	1	2	2	2	1	2	1	1	2	2	2	2	2	2	2	2	2	2	2	2	2	2	2	1	1	2	2	2	2	2	2	10	2	1	2	2
1269	1	2	1	5	24	4	4	2	2	7	2	3	4	2	3	2	2	2	2	2	2	2	2	2	2	2	2	2	2	2	2	2	2	2	2	2	2	1	2	2	2	2	2	2	10	2	1	2	2
1250	1	2	1	3	2	3	3	1	1	6	2	2	2	2	2	2	2	2	2	2	2	2	2	2	2	2	2	2	2	2	2	2	2	2	2	2	7	1	2	2	2	2	2	2	10	1	1	1	2
1401	1	2	1	1	7	3	3	1	1	11	3	4	5	2	3	2	2	1	1	2	2	2	2	2	2	2	2	2	2	2	2	2	2	2	2	2	2	2	1	2	2	1	2	1	8	1	1	1	2
1277	1	2	1	3	4	2	3	1	1	8	2	3	4	2	2	2	2	2	2	2	2	2	2	2	2	2	2	2	2	2	2	2	2	2	2	2	7	1	2	2	3	2	2	1	11	1	1	1	2
238	1	1	1	4	4	3	3	1	1	10	3	2	3	1	2	2	2	2	2	2	2	2	2	2	2	2	2	2	2	2	2	2	2	2	2	2	1	3	3	2	2	2	2	1		1	1	1	2
1012	2	3	1	5	10	4	4	2	2	4	1	2	3	1	3	2	2	2	2	2	2	2	2	2	2	2	2	2	2	2	2	2	2	2	2	2	7	1	2	2	2	2	2	2	10	1	1	2	2
562	1	3	1	4	4	4	4	2	2	9	3	3	4	2	2	2	2	1	2	2	2	2	2	2	2	1	2	2	2	2	1	2	2	2	2	2	1	1	2	2	2	2	2	2	10	1	1	2	2
490	1	1	1	3	10	2	2	1	1	11	3	3	4	2	2	2	2	1	2	2	2	2	2	2	2	1	2	2	2	2	2	2	2	2	2	2	3	3	3	2	2	2	2	1		1	1	2	2
1019	2	3	1	1		2	1	1	1	2	1	3	4	2	1	1	1	1	2	2	2	2	2	2	2	2	2	2	2	2	2	1	2	2	2	2	3	3	3	3	1	2	1	1		6	2	1	2
874	2	1	1	3	2	4	4	2	2	8	2	3	4	1	4	1	1	1	1	1	1	1	1	2	2	2	2	2	2	2	2	2	2	2	2	2	4	2	1	2	3	1	1	1	8	6	2	2	2
700	2	1	1	3	14	3	3	1	1	11	3	3	4	1	5	1	1	1	2	2	2	2	2	2	2	2	2	2	2	2	2	2	2	1	2	2	4	3	3	2	2	2	2	1		6	2	2	2
534	1	1	1	5	10	3	4	1	2	6	2	3	4	1	4	1	1	1	2	2	2	2	2	2	2	2	2	2	2	2	2	2	2	1	2	2	2	3	3	2	2	2	2	1		6	2	2	2
499	1	1	1	2	34	4	3	2	1	5	1	2	3	2	4	1	1	1	1	2	2	2	2	2	2	2	2	2	2	2	2	2	2	2	2	2	6	2	1	3	3	2	3	1	12	6	2	2	2
1272	1	2	1	1	52	3	4	1	2	9	3	3	4	2	4	1	1	1	2	2	1	2	1	2	2	1	2	2	2	2	2	2	2	2	2	2	2	2	1	3	2	1	1	1	8	5	1	2	2
1427	1	2	1	5	10	4	3	2	1	7	2	1	1	1	4	1	1	1	1	2	2	2	2	2	2	2	2	2	2	2	2	2	2	2	2	2	1	2	1	2	2	1	1	1	7	4	1	2	2
1033	1	1	1	1	25	3	4	1	2	3	1	2	2	2	3	1	1	1	1	2	2	1	2	2	2	2	2	2	2	2	2	2	2	2	2	2	2	2	1	2	2	2	2	1	9	3	1	2	1
430	1	3	1	3	9	3	4	1	2	5	1	2	3	1	3	1	1	1	2	2	2	2	2	2	2	2	2	2	2	1	1	2	2	2	2	2	1	2	1	1	3	1	3	1	9	3	1	2	2
327	1	1	1	1	46	4	4	2	2	3	1	2	3	1	3	1	1	1	2	2	2	2	2	2	2	2	2	2	2	2	1	2	2	2	2	2	6	2	1	2	2	1	1	1	7	2	1	1	2
1403	1	2	1	4	4	3	1	1	1	7	2	3	4	2	4	1	1	1	1	2	1	1	1	2	2	2	2	2	2	2	1	2	2	2	2	2	1	2	1	1	1	1	1	1	5	2	1	1	2
1531	1	2	1	1	1	4	4	2	2	8	2	2	3	2	4	1	1	1	1	1	1	2	1	2	2	1	2	2	2	1	1	2	2	2	2	2	1	2	1	2	1	1	1	1	6	2	1	1	2
511	2	1	1	5	10	1	3	1	1	11	3	3	4	1	3	1	1	1	2	2	2	2	2	2	2	2	2	2	2	2	2	2	2	1	2	2	5	2	1	2	2	1	1	1	7	2	1	2	2
953	1	1	1	4	4	4	4	2	2	8	2	1	1	2	4	1	1	1	2	2	2	2	2	2	2	1	2	2	2	2	2	2	2	2	2	2	1	2	1	2	2	2	2	1	9	1	1	1	2
185	1	1	1	1	52	4	2	2	1	9	3	3	4	1	4	1	2	2	2	2	2	2	2	2	2	2	2	2	2	2	2	2	2	2	2	2	1	2	1	2	2	1	1	1	7	4	1	1	2
939	1	1	1	5	30	4	3	2	1	4	1	3	4	1	3	1	2	2	2	2	2	2	2	2	2	2	2	2	2	2	2	2	2	2	2	2	1	1	2	2	2	2	2	2	10	2	1	2	2
623	2	1	1	4	4	4	3	2	1	2	1	4	5	1	1	1	2	2	2	2	2	2	2	2	2	2	2	2	2	2	2	2	2	2	2	2	7	1	2	2	2	2	2	2	10	1	1	2	2
1640	1	2	1	1	73	4	4	2	2	11	3	2		2	2	3	2		2	2	2	2	2	2	2	2	2	2	2	2	2	2	2	2	2	3	7	1	2	2	2	2	2	2	10	2	1	1	2
1621	1	2	1	4	4	3	3	1	1	11	3	2		2	4	2	1	1	2	2	2	2	1	2	2	2	2	2	2	2	2	2	2	2	2	3	2	2	1	2	2	2	2	1	9	2	1	2	2
1671	1	2	1	4	4	3	3	1	1	8	2	2		1	3	2	1	1	2	1	2	2	2	2	2	2	2	2	2	2	2	2	2	2	2	3	1	3	3	2	2	1	1	1		2	1	2	2
1536	1	2	1	4	4	4	4	2	2	9	3	3		2	3	2	1	1	1	2	1	2	2	2	2	2	2	2	2	2	2	2	2	2	2	3	4	1	2	2	2	2	1	1	9	1	1	1	2
1570	1	2	1	4	11	4	4	2	2	10	3	3	3	2	4	2	2		2	2	2	2	2	2	2	2	2	2	2	2	2	2	2	2	2	3	1	2	1	2	2	2	2	1	9	2	1	2	2
1639	1	2	1	4	4	4	4	2	2	9	3	2		1	3	2	2	2	2	2	2	2	2	2	2	2	2	2	2	2	2	2	2	2	2	3	2	3	3	2	2	2	2	1		1	1	1	2
1707	1	2	1	3	10	2	3	1	1	4	1	2		2	3	2	2	2	2	2	2	2	2	2	2	2	2	2	2	2	2	2	2	2	2	3	2	1	2	2	2	2	3	1	11	1	1	1	2
1710	1	2	1	3	26	4	4	2	2	11	3	2		2	4	1	1	1	1	1	1	2	2	2	2	1	2	2	2	2	2	2	1	2	2	3	1	2	1	1	3	1	1	1	7	2	1	1	2
1095	1	1	2	5	10	2	2	1	1	2	1	2	3	2	5	4	2	2	2	2	2	2	2	2	2	2	2	2	2	2	2	2	2	2	2	3	1	3	3	3	3	3	3	1		2	1	2	2
911	1	1	1	4	4	4	4	2	2	4	1	2	2	1	4	4	1	1	2	2	2	2	2	2	2	2	2	2	2	2	1	2	2	2	2	3	2	1	2	2	2	2	2	2	10	1	1	1	2
1211	1	2	1	1		4	4	2	2	2	1	3	4	1	1	4	2	2	2	2	2	2	2	2	2	2	2	2	2	2	2	2	2	2	2	3	2	1	2	2	2	2	2	2	10	5	1	2	2
388	1	1	1	3	15	4	4	2	2	4	1	1	1	2	1	4	2	2	2	2	2	2	2	2	2	2	2	2	2	2	2	2	2	2	2	3	2	1	2	2	2	2	2	2	10	2	1	2	2
629	1	1	1	5	10	2	4	1	2	7	2	3	4	2	1	4	2	2	2	2	2	2	2	2	2	2	2	2	2	2	2	2	2	2	2	3	7	1	2	2	2	2	2	2	10	1	1	1	2
226	1	1	1	4	4	4	4	2	2	9	3	4	5	1	2	4	2	2	2	2	2	2	2	2	2	2	2	2	2	2	2	2	2	2	2	3	7	1	2	2	2	2	2	2	10	1	1	2	2
172	1	1	1	1	52	3	4	1	2	5	1	3	4	2	3	3	1	1	2	1	2	2	2	2	2	2	2	2	2	2	2	2	2	2	2	3	7	2	1	3	3	2	2	1	11	3	1	2	2
439	2	1	1	5	10	4	4	2	2	8	2	4	5	1	2	3	1	1	2	2	2	1	2	2	2	2	2	2	2	2	2	2	2	2	2	3	1	1	2	2	2	2	2	2	10	2	1	2	2
291	1	1	1	1	36	4	4	2	2	8	2	3	4	2	3	3	1	1	2	2	2	1	2	2	2	2	2	2	2	2	2	2	2	2	2	3	2	2	1	2	2	2	2	1	9	2	1	2	2
1148	1	2	1	5	10	4	4	2	2	4	1	3	4	1	3	3	1	1	2	1	2	2	2	2	2	2	2	2	2	2	2	2	2	2	2	3	2	2	1	2	2	3	2	1	10	2	1	2	2
196	1	1	1	3	5	3	2	1	1	6	2	3	4	1	3	3	1	1	1	2	2	2	2	2	2	2	2	2	2	2	2	2	2	2	2	3	7	1	2	2	2	2	1	1	9	2	1	2	2
267	1	1	1	3	5	3	2	1	1	6	2	3	4	1	3	3	1	1	1	2	2	2	2	2	2	2	2	2	2	2	2	2	2	2	2	3	7	1	2	2	2	2	1	1	9	2	1	2	2
994	2	1	1	2	62	4	4	2	2	6	2	3	4	2	3	3	1	1	1	2	2	2	2	2	2	2	2	2	2	2	2	2	2	2	2	3	7	1	2	2	2	2	2	2	10	1	1	1	1
517	1	1	1	4	7	4	4	2	2	4	1	2	3	2	2	3	1	1	1	2	2	2	2	2	2	2	2	2	2	2	2	2	2	2	2	3	1	1	2	2	2	2	2	2	10	1	1	2	2
402	1	1	1	5	10	4	4	2	2	10	3	2	2	1	1	3	2	2	2	2	2	2	2	2	2	2	2	2	2	2	2	2	2	2	2	3	1	1	2	3	3	3	3	1	14	4	1	1	2
266	1	1	1	4	7	4	4	2	2	7	2	1	1	1	1	3	2	1	2	2	2	2	2	2	2	2	2	2	2	2	2	2	2	1	2	3	2	1	2	2	2	2	2	2	10	2	1	1	1
1355	1	2	1	5	10	4	4	2	2	11	3	2	3	2	2	3	2	2	2	2	2	2	2	2	2	2	2	2	2	2	2	2	2	2	2	3	3	3	3	2	2	2	2	1		2	1	1	2
47	1	1	1	4	12	4	4	2	2	7	2	1	1	1	2	3	2	1	2	2	2	2	2	2	2	2	2	2	2	2	2	2	2	1	2	3	2	1	2	2	2	2	2	2	10	2	1	1	2
5	1	1	1	4	12	3	3	1	1	11	3	3	4	2	3	3	2	1	1	2	2	2	2	2	2	2	2	2	2	2	2	2	2	2	2	3	2	1	2	2	2	2	3	1	11	2	1	1	2
1126	1	2	1	5	10	4	4	2	2	11	3	2	3	2	1	3	2	2	2	2	2	2	2	2	2	2	2	2	2	2	2	2	2	2	2	3	2	3	3	2	2	2	2	1		2	1	1	2
986	2	1	1	1	1	2	2	1	1	11	3	3	4	1	2	3	2	1	2	2	2	2	2	1	2	2	2	2	2	2	2	2	2	1	2	3	7	2	1	2	2	2	2	1	9	2	1	2	1
87	1	1	1	4	12	4	4	2	2	7	2	1	1	1	2	3	2	1	2	2	2	2	2	2	2	2	2	2	2	2	2	2	2	1	2	3	2	1	2	2	2	2	2	2	10	2	1	2	2
72	1	1	1	4	7	4	4	2	2	7	2	1	1	1	1	3	2	1	2	2	2	2	2	2	2	2	2	2	2	2	2	2	2	1	2	3	2	1	2	2	2	2	2	2	10	2	1	2	2
877	1	1	1	5	10	4	4	2	2	7	2	3	4	2	1	3	2	2	2	2	2	2	2	2	2	2	2	2	2	2	2	2	2	2	2	3	7	1	2	2	2	3	3	1	12	2	1	2	2
1378	1	2	1	5	10	4	3	2	1	7	2	3	4	1	2	3	2	2	2	2	2	2	2	2	2	2	2	2	2	2	2	2	2	2	2	3	2	1	2	2	2	2	2	2	10	2	1	2	2
282	2	3	1	1	36	4	3	2	1	10	3	1	1	1	2	3	2	2	2	2	2	2	2	2	2	2	2	2	2	2	2	2	2	2	2	3	7	1	2	2	2	2	2	2	10	1	1	1	2
542	2	1	2	5	10	2	3	1	1	2	1	2	2	1	3	3	2	2	2	2	2	2	2	2	2	2	2	2	2	2	2	2	2	2	2	3	7	1	2	2	2	2	2	2	10	1	1	1	2
1005	2	1	1	5	30	2	4	1	2	11	3	2	3	1	1	3	2	2	2	2	2	2	2	2	2	2	2	2	2	2	2	2	2	2	2	3	7	1	2	2	2	2	2	2	10	1	1	1	2
795	1	1	1	1	48	1	1	1	1	11	3	3	4	2	1	3	2	2	2	2	2	2	2	2	2	2	2	2	2	2	2	2	2	2	2	3	1	1	2	2	2	2	2	2	10	1	1	1	2
1478	1	2	1	1	1	4	4	2	2	6	2	3	4	1	2	3	2	2	2	2	2	2	2	2	2	2	2	2	2	2	2	2	2	2	2	3	7	1	2	2	2	2	2	2	10	1	1	1	2
565	2	1	1	2	45	3	3	1	1	6	2	2	3	2	3	3	2	2	2	2	2	2	2	2	2	2	2	2	2	2	2	2	2	2	2	3	7	1	2	3	2	2	2	1	11	1	1	2	2
862	1	1	1	5	10	4	3	2	1	4	1	1	1	2	3	2	1	1	2	1	1	1	2	2	2	2	2	2	2	2	2	2	2	2	2	3	2	3	3	2	2	2	2	1		5	1	1	2
781	2	1	1	5		4	3	2	1	11	3	4	5	2	3	2	1	1	2	2	2	2	2	2	2	1	2	2	2	2	2	2	2	2	2	3	1	2	1	1	2	2	2	1	8	5	1	1	2
658	1	1	1	2		2	1	1	1	5	1	2	3	1	2	2	1	1	1	2	2	2	2	2	2	2	2	2	2	2	2	2	2	2	2	3	1	1	2	1	1	1	1	1	6	5	1	1	2
922	2	1	1	5	10	2	1	1	1	11	3	2	3	1	3	2	1	1	2	2	1	2	2	1	2	2	2	2	2	2	2	2	2	2	2	3	7	1	2	2	2	1	1	1	8	5	1	2	1
360	1	1	1	1	1	2	3	1	1	11	3	2	2	1	3	2	1	1	2	2	2	2	2	2	2	2	2	2	2	1	2	2	2	2	2	3	1	3	3	2	3	3	1	1		5	1	2	2
537	1	1	1	5	10	2	3	1	1	6	2	3	4	1	4	2	1	1	2	1	1	2	2	1	2	2	2	2	2	2	2	2	2	2	2	3	2	2	1	2	1	2	2	1	8	5	1	2	2
85	1	1	1	4	7	3	3	1	1	9	3	3	4	2	3	2	1	1	1	2	2	2	2	2	2	2	2	2	2	2	2	2	2	2	2	3	2	3	3	2	2	2	2	1		4	1	1	2
515	1	1	1	5	10	2	3	1	1	5	1	1	1	2	3	2	1	1	2	2	2	2	2	2	2	2	1	2	2	2	2	2	2	1	2	3	2	3	3	2	3	2	2	1		4	1	1	2
65	1	1	1	4	7	3	3	1	1	9	3	3	4	2	3	2	1	1	1	2	2	2	2	2	2	2	2	2	2	2	2	2	2	2	2	3	2	3	3	2	2	2	2	1		4	1	2	2
829	1	1	1	4	6	3	3	1	1	9	3	1	1	2	4	2	1	1	1	2	1	1	2	2	2	2	2	2	2	2	2	2	2	2	2	3	1	2	1	1	1	1	1	1	5	4	1	2	2
553	1	3	1	5	10	4	3	2	1	11	3	2	2	1	3	2	1	1	2	1	2	2	1	2	2	2	2	2	2	1	2	2	2	2	2	3	1	2	1	1	2	2	2	1	8	3	1	2	2
481	1	1	1	4	11	3	4	1	2	3	1	2	2	1	3	2	1	1	1	1	1	2	2	2	2	1	2	2	2	2	2	2	2	2	2	3	1	3	3	3	1	1	1	1		3	1	2	2
1437	1	2	1	5	10	4	4	2	2	5	1	3	4	1	4	2	1	1	2	2	1	1	2	2	2	2	2	2	1	2	2	2	2	2	2	3	2	1	2	2	2	2	2	2	10	3	1	2	2
123	1	1	1	4	4	4	4	2	2	9	3	2	3	1	3	2	1	2	2	2	2	2	2	2	2	2	2	2	2	2	2	2	2	2	2	3	1	1	2	2	2	2	2	2	10	2	1	1	2
127	1	1	1	4	4	4	4	2	2	9	3	2	3	1	3	2	1	2	2	2	2	2	2	2	2	2	2	2	2	2	2	2	2	2	2	3	1	1	2	2	2	2	2	2	10	2	1	1	2
380	1	1	1	4	4	2	4	1	2	7	2	2	2	1	3	2	1	2	2	2	2	2	2	2	2	2	2	2	2	2	2	2	2	2	2	3	1	1	2	2	2	2	2	2	10	2	1	1	2
446	1	1	1	2	10	4	4	2	2	4	1	4	5	1	1	2	1	2	2	2	2	2	2	2	2	2	2	2	2	2	2	2	2	2	2	3	7	1	2	2	2	2	2	2	10	2	1	1	2
135	1	1	1	4	4	4	4	2	2	11	3	4	5	1	2	2	1	1	2	2	1	2	2	2	2	2	2	2	2	2	2	2	2	2	2	3	7	1	2	2	2	2	2	2	10	2	1	1	2
378	1	1	1	4	11	4	4	2	2	3	1	2	2	1	3	2	1	1	2	1	2	2	1	2	2	2	2	2	2	2	2	2	2	2	2	3	2	2	1	3	1	1	1	1	7	2	1	1	2
1242	1	2	1	3	19	3	4	1	2	6	2	3	4	1	4	2	1	1	1	2	2	2	2	2	2	2	2	2	2	2	2	2	2	2	2	3	1	3	3	3	3	3	3	1		2	1	1	2
173	1	3	1	1	52	3	4	1	2	9	3	3	4	1	4	2	1	1	1	2	1	2	2	2	2	2	2	2	2	2	2	2	2	2	2	3	4	2	1	3	1	1	1	1	7	2	1	2	2
125	1	1	1	3	4	3	3	1	1	11	3	3	4	1	2	2	1	1	2	2	2	2	2	2	2	2	2	2	2	2	2	2	2	1	2	3	3	1	2	2	2	2	2	2	10	2	1	2	2
335	1	1	1	1	36	4	4	2	2	7	2	3	4	2	4	2	1	1	1	2	1	2	2	2	2	2	2	2	2	2	2	2	2	2	2	3	2	1	2	2	2	2	2	2	10	2	1	2	2
1267	1	2	1	5	40	4	4	2	2	7	2	4	5	2	3	2	1	1	2	2	2	2	1	2	2	2	2	2	2	2	2	2	2	2	2	3	4	1	2	2	2	2	2	2	10	2	1	2	2
136	1	1	1	4	4	4	4	2	2	11	3	4	5	1	2	2	1	1	2	2	1	2	2	2	2	2	2	2	2	2	2	2	2	2	2	3	7	1	2	2	2	2	2	2	10	2	1	2	2
137	1	1	1	4	4	4	4	2	2	11	3	4	5	1	2	2	1	1	2	2	1	2	2	2	2	2	2	2	2	2	2	2	2	2	2	3	7	1	2	2	2	2	2	2	10	2	1	2	2
1006	1	1	1	2	49	1	3	1	1	11	3	3	4	2	4	2	1	1	2	1	2	2	2	2	2	2	2	2	2	2	2	2	2	2	2	3	2	2	1	1	1	2	2	1	7	2	1	2	2
1049	1	1	1	5	10	4	4	2	2	10	3	2	2	1	3	2	1	1	2	1	2	2	2	2	2	2	2	2	2	2	2	2	2	2	2	3	2	2	1	2	2	2	2	1	9	2	1	2	2
208	1	1	1	5	7	2	3	1	1	11	3	4	5	1	3	2	1	1	2	2	2	2	1	2	1	2	2	2	2	2	2	2	2	2	2	3	2	2	1	2	2	2	3	1	10	2	1	2	2
240	1	1	1	4	4	4	4	2	2	7	2	2	2	1	3	2	1	1	1	2	2	2	2	2	2	2	2	2	2	2	2	2	2	2	2	3	1	3	3	2	2	2	2	1		2	1	2	2
720	2	1	1	4		2	2	1	1	11	3	3	4	2	3	2	1	1	1	2	1	2	2	2	1	2	2	1	2	2	2	2	2	2	2	3	2	3	3	1	3	3	3	1		2	1	2	2
3	1	1	1	4	4	4	4	2	2	8	2	4	5	1	3	2	1	1	2	2	1	2	2	2	2	2	2	2	2	2	2	2	2	2	2	3	6	2	1	2	2	1	3	1	9	2	1	2	2
233	1	1	1	4	4	4	4	2	2	8	2	2	3	1	3	2	1	1	2	2	2	2	2	2	2	2	2	2	2	2	1	2	2	2	2	3	7	1	2	2	2	1	2	1	9	1	1	1	1
464	2	1	1	5	10	4	4	2	2	11	3	4	5	2	1	2	1	1	1	2	2	2	2	2	2	2	2	2	2	2	2	2	2	2	2	3	1	1	2	2	2	2	2	2	10	1	1	1	2
1395	1	2	1	5	10	4	4	2	2	11	3	2	2	1	3	2	1	1	1	2	2	2	2	2	2	2	2	2	2	2	2	2	2	2	2	3	1	1	2	2	2	2	2	2	10	1	1	1	2
639	1	3	1	4	7	4	4	2	2	5	1	2	3	1	2	2	1	1	2	1	2	2	2	2	2	2	2	2	2	2	2	2	2	2	2	3	2	1	2	2	2	2	2	2	10	1	1	1	2
231	1	1	1	4	4	4	4	2	2	8	2	2	3	1	3	2	1	1	2	2	2	2	2	2	2	2	2	2	2	2	1	2	2	2	2	3	7	1	2	2	2	1	2	1	9	1	1	1	2
859	1	1	1	1	13	4	4	2	2	4	1	1	1	2	3	2	1	1	2	1	2	2	2	2	2	2	2	2	2	2	2	2	2	1	2	3	2	1	2	2	2	2	2	2	10	1	1	2	2
436	1	1	1	5	10	4	4	2	2	5	1	1	1	1	3	2	1	1	2	2	2	2	2	2	2	2	2	2	2	2	1	1	2	2	2	3	2	2	1	1	2	2	3	1	9	1	1	2	2
1227	1	2	1	4	4	4	4	2	2	10	3	2	3	1	4	2	1	1	2	1	1	2	2	2	2	2	2	2	2	2	2	2	2	2	2	3	2	2	1	2	2	2	2	1	9	1	1	2	2
956	1	3	1	2	45	4	4	2	2	9	3	3	4	2	3	2	1	1	1	2	2	1	1	2	2	1	1	2	2	2	2	2	2	2	2	3	1	2	1	3	3	1	1	1	9	1	1	2	2
34	2	1	1	5	4	4	4	2	2	5	1	2	2	1	1	2	2	1	2	2	2	2	2	2	1	2	2	2	2	2	2	2	2	2	2	3	1	2	1	2	2	2	2	1	9	5	1	2	2
1332	1	2	1	5	10	3	4	1	2	8	2	3	4	1	3	2	2	2	2	2	2	2	2	2	2	2	2	2	2	2	2	2	2	2	2	3	1	1	2	2	2	2	2	2	10	5	1	2	2
540	2	1	1	5	10	4	3	2	1	8	2	3	4	2	3	2	2	2	2	2	2	2	2	2	2	2	2	2	2	2	2	2	2	2	2	3	2	1	2	2	2	2	2	2	10	2	1	1	1
533	1	1	1	5	10	3	3	1	1	3	1	2	3	1	3	2	2	2	2	2	2	2	2	2	2	2	2	2	2	2	2	2	2	2	2	3	2	1	2	2	2	2	2	2	10	2	1	1	2
437	1	1	1	4	11	4	2	2	1	9	3	4	5	2	3	2	2	1	2	2	2	2	2	2	2	2	2	2	2	2	2	2	2	1	2	3	2	2	1	3	2	2	2	1	10	2	1	1	2
880	1	3	1	5	10	4	4	2	2	2	1	2	3	2	1	2	2	2	2	2	2	2	2	2	2	2	2	2	2	2	2	2	2	2	2	3	2	3	3	2	2	2	2	1		2	1	1	2
324	1	1	1	4	4	4	4	2	2	9	3	2	3	1	3	2	2	2	2	2	2	2	2	2	2	2	2	2	2	2	2	2	2	2	2	3	2	1	2	2	2	2	2	2	10	2	1	2	2
1273	1	2	1	3	19	4	4	2	2	8	2	3	4	1	2	2	2	2	2	2	2	2	2	2	2	2	2	2	2	2	2	2	2	2	2	3	7	1	2	2	2	2	2	2	10	2	1	2	2
646	1	3	1	3	51	1	1	1	1	8	2	3	4	2	4	2	2	2	2	2	2	2	2	2	2	2	2	2	2	2	2	2	2	2	2	3	1	2	1	2	2	2	2	1	9	2	1	2	2
996	1	1	1	5	10	4	4	2	2	11	3	3	4	1	3	2	2	1	2	2	2	2	2	2	2	2	2	2	2	2	2	2	2	1	2	3	7	3	3	2	2	2	2	1		2	1	2	2
1	1	1	1	2	4	4	4	2	2	9	3	3	4	2	2	2	2	1	2	2	2	2	2	2	2	2	2	2	2	2	2	2	2	1	2	3	2	1	2	2	2	2	2	2	10	2	1	2	2
1480	1	2	1	5	10	4	4	2	2	11	3	3	4	1	3	2	2	2	2	2	2	2	2	2	2	2	2	2	2	2	2	2	2	2	2	3	7	1	2	2	2	1	1	1	8	2	1	2	2
21	2	1	1	3		4	3	2	1	11	3	3	4	2	3	2	2	1	2	2	2	2	2	2	2	2	2	2	2	2	2	2	2	1	2	3	1	3	3	3	2	3	3	1		1	1	1	2
1396	1	2	1	4	4	3	4	1	2	5	1	2	2	1	3	2	2	2	2	2	2	2	2	2	2	2	2	2	2	2	2	2	2	2	2	3	1	1	2	2	2	2	2	2	10	1	1	1	2
1039	2	1	1	2	49	2	4	1	2	7	2	2	2	1	2	2	2	1	2	2	2	2	2	2	2	2	2	2	2	2	2	2	2	1	2	3	7	1	2	3	2	2	2	1	11	1	1	2	2
601	1	1	1	1	48	4	4	2	2	8	2	3	4	1	4	1	1	1	1	2	1	2	2	2	2	2	2	2	1	2	2	2	2	2	2	3	2	1	2	2	2	2	2	2	10	4	1	1	2
567	1	1	1	4	11	2	4	1	2	8	2	1	1	1	4	1	1	1	1	1	1	1	2	2	2	1	2	2	2	2	2	2	2	2	2	3	1	2	1	3	3	1	1	1	9	3	1	1	2
592	1	1	1	5	10	4	4	2	2	7	2	1	1	1	4	1	1	1	1	1	2	2	2	2	2	2	2	2	2	2	2	2	2	2	2	3	2	3	3	2	2	1	2	1		3	1	2	2
138	1	1	1	1	52	4	3	2	1	10	3	1	1	2	4	1	1	2	2	2	2	2	2	2	2	2	2	2	2	2	2	2	2	2	2	3	1	2	1	3	3	2	2	1	11	2	1	1	2
140	1	1	1	1	52	4	3	2	1	10	3	1	1	2	4	1	1	2	2	2	2	2	2	2	2	2	2	2	2	2	2	2	2	2	2	3	1	2	1	3	3	2	2	1	11	2	1	1	2
407	1	1	1	5	10	4	4	2	2	5	1	1	1	1	4	1	1	1	1	1	2	2	1	2	2	2	2	2	2	2	2	2	2	2	2	3	2	1	2	2	2	2	2	2	10	2	1	2	2
23	1	3	1	4	4	2	4	1	2	7	2	2	2	1	3	1	1	1	2	2	1	2	2	2	2	2	2	2	2	2	2	2	2	1	2	3	1	2	1	2	2	1	2	1	8	2	1	2	2
42	1	1	1	4	12	4	4	2	2	6	2	3	4	2	4	1	1	1	1	2	2	2	2	2	2	2	2	2	2	2	2	2	2	2	2	3	2	2	1	2	2	2	2	1	9	2	1	2	2
693	1	1	1	4	4	3	3	1	1	2	1	1	1	1	2	1	1	1	1	2	2	2	2	2	2	2	2	2	2	2	2	2	2	2	2	3	2	2	1	2	2	2	2	1	9	1	1	2	2
826	1	1	1	2	45	3	4	1	2	5	1	3	4	2	4	1	2	2	2	2	2	2	2	2	2	2	2	2	2	2	2	2	2	2	2	3	1	2	1	3	3	1	1	1	9	6	2	1	2
1634	1	2	1	4	4	4	4	2	2	8	2	3	3	1	1	4	1	1	2	2	2	2	2	2	2	2	2	2	2	2	2	2	2	2	2	4	7	3	3	2	2	2	2	1		1	1	1	2
1680	1	2	1	3	4	4	2	2	1	6	2	3		2	3	2	1	1	2	2	2	2	2	2	2	2	2	1	2	2	2	2	2	2	2	4	1	2	1	2	1	1	1	1	6	3	1	2	2
1550	1	2	1	3	4	4	4	2	2	5	1	3	3	1	3	1	1		1	1	1	2	2	2	2	2	2	2	2	2	2	2	2	2	2	4	2	3	3	2	2	2	2	1		6	2	2	2
979	2	1	1	1	48	4	4	2	2	7	2	3	4	2	1	4	2	1	2	2	2	2	2	2	2	2	2	2	2	2	2	2	2	1	2	4	7	1	2	3	3	3	2	1	13	1	1	1	2
1139	1	2	1	3	19	4	4	2	2	8	2	1	1	1	1	4	1	1	2	2	1	2	2	2	2	2	2	2	2	2	2	2	2	2	2	4	7	1	2	2	2	2	2	2	10	1	1	2	2
86	2	1	1	5	10	4	4	2	2	8	2	3	4	1	5	4	2	1	2	2	1	2	2	2	2	2	2	2	2	2	2	2	2	2	2	4	2	3	3	2	2	2	2	1		2	1	2	2
1359	1	2	1	5	10	4	4	2	2	3	1	4	5	1	3	4	2	2	2	2	2	2	2	2	2	2	2	2	2	2	2	2	2	2	2	4	3	1	2	2	2	2	2	2	10	1	1	1	1
977	1	1	1	5	30	4	4	2	2	9	3	3	4	2	1	4	2	2	2	2	2	2	2	2	2	2	2	2	2	2	2	2	2	2	2	4	2	1	2	2	2	2	2	2	10	1	1	2	2
695	2	1	1	5	10	4	4	2	2	2	1	4	5	2	1	4	2	2	2	2	2	2	2	2	2	2	2	2	2	2	2	2	2	2	2	4		1	2	2	2	3	2	1	11	1	1	2	2
627	2	1	1	5	10	3	4	1	2	11	3	2	2	1	2	3	1	1	2	1	2	2	2	2	2	2	2	2	2	2	2	2	2	2	2	4	2	1	2	2	2	2	2	2	10	2	1	1	2
262	1	1	1	5	10	4	4	2	2	9	3	2	3	1	3	3	1	2	2	2	2	2	2	2	2	2	2	2	2	2	2	2	2	2	2	4	4	1	2	2	2	2	2	2	10	1	1	1	2
688	1	1	1	4	7	4	4	2	2	11	3	3	4	1	1	3	1	1	2	2	2	2	2	2	2	1	2	2	2	2	2	2	2	2	2	4	7	2	1	2	2	2	2	1	9	1	1	2	2
1356	1	2	1	5	10	4	4	2	2	5	1	3	4	2	3	3	2	2	2	2	2	2	2	2	2	2	2	2	2	2	2	2	2	2	2	4	7	1	2	2	2	2	2	2	10	2	1	1	1
355	1	1	1	5	10	4	4	2	2	5	1	2	3	2	1	3	2	2	2	2	2	2	2	2	2	2	2	2	2	2	2	2	2	2	2	4	7	1	2	2	2	2	2	2	10	2	1	1	2
323	1	1	1	4	4	4	3	2	1	11	3	3	4	2	2	3	2	1	2	1	2	2	1	2	2	2	2	2	2	2	1	2	2	2	2	4	2	1	2	2	2	2	2	2	10	2	1	1	2
1279	1	2	1	5	10	3	3	1	1	10	3	3	4	2	1	3	2	2	2	2	2	2	2	2	2	2	2	2	2	2	2	2	2	2	2	4	7	1	2	2	2	2	2	2	10	2	1	1	2
440	1	1	1	5	10	4	4	2	2	11	3	1	1	1	2	3	2	2	2	2	2	2	2	2	2	2	2	2	2	2	2	2	2	2	2	4	2	1	2	2	2	2	2	2	10	2	1	1	2
1215	1	2	1	3	2	4	4	2	2	9	3	2	3	2	2	3	2	2	2	2	2	2	2	2	2	2	2	2	2	2	2	2	2	2	2	4	1	1	2	2	2	2	2	2	10	2	1	1	2
245	1	1	1	4	4	4	3	2	1	11	3	3	4	2	2	3	2	1	2	1	2	2	1	2	2	2	2	2	2	2	1	2	2	2	2	4	2	1	2	2	2	2	2	2	10	2	1	2	2
780	2	3	1	4		3	4	1	2	2	1	1	1	1	1	3	2	2	2	2	2	2	2	2	2	2	2	2	2	2	2	2	2	2	2	4	7	1	2	2	2	2	2	2	10	1	1	1	2
443	1	1	1	5	10	4	4	2	2	8	2	1	1	1	2	3	2	2	2	2	2	2	2	2	2	2	2	2	2	2	2	2	2	2	2	4	2	1	2	2	2	2	2	2	10	1	1	1	2
524	1	1	1	5	10	2	2	1	1	6	2	1	1	2	3	3	2	2	2	2	2	2	2	2	2	2	2	2	2	2	2	2	2	2	2	4	2	1	2	2	2	2	2	2	10	1	1	2	2
1426	1	2	1	4	12	4	4	2	2	10	3	3	4	1	2	2	1	1	2	2	2	2	2	2	2	2	2	2	2	2	1	2	2	2	2	4	1	2	1	2	2	1	1	1	7	5	1	2	2
426	1	1	1	5	10	3	4	1	2	9	3	3	4	2	3	2	1	1	1	2	2	2	2	2	2	1	2	2	2	2	2	2	2	2	2	4	1	1	2	2	2	2	2	2	10	3	1	1	2
174	1	3	1	4	6	2	3	1	1	9	3	2	2	1	2	2	1	1	1	1	1	2	1	2	2	1	2	2	2	2	2	2	2	2	2	4	7	3	3	2	2	1	1	1		3	1	2	2
1181	1	2	1	4	4	4	4	2	2	8	2	3	4	2	3	2	1	1	2	2	1	2	2	2	2	2	2	2	2	2	2	2	2	2	2	4	7	2	1	2	2	2	2	1	9	2	1	1	2
1248	1	2	1	4	12	3	4	1	2	7	2	3	4	2	3	2	1	1	2	2	2	2	1	2	2	2	2	2	2	2	2	2	2	2	2	4	4	1	2	2	2	3	3	1	12	2	1	1	2
1265	1	2	1	5	30	3	4	1	2	5	1	2	3	2	3	2	1	1	2	2	1	2	2	1	2	2	2	2	2	2	2	2	2	2	2	4	1	1	2	2	3	1	1	1	9	2	1	1	2
296	1	1	1	5	10	3	3	1	1	2	1	2	2	1	3	2	1	2	2	2	2	2	2	2	2	2	2	2	2	2	2	2	2	2	2	4	2	1	2	2	2	2	2	2	10	2	1	2	2
526	2	1	1	5	10	4	4	2	2	7	2	3	4	2	3	2	1	1	2	2	2	1	2	2	1	1	2	2	2	2	2	2	2	2	2	4	4	1	2	3	2	1	1	1	9	2	1	2	2
1312	1	2	1	4	12	2	4	1	2	6	2	3	4	2	2	2	1	1	1	2	1	1	1	2	2	2	2	2	2	2	2	2	2	2	2	4	4	3	3	2	2	1	1	1		2	1	2	2
339	1	1	1	4	7	4	4	2	2	6	2	2	3	2	2	2	1	1	2	2	2	1	2	2	2	2	2	2	2	2	2	2	2	2	2	4	2	1	2	2	2	2	2	2	10	1	1	1	2
1459	1	2	1	1	1	4	4	2	2	3	1	2	3	1	3	2	1	1	2	2	1	1	1	2	2	2	2	2	2	2	1	2	2	2	2	4	5	1	2	2	2	1	1	1	8	1	1	1	2
95	1	1	1	4	4	4	4	2	2	11	3	3	4	1	4	2	1	1	1	2	2	2	1	2	2	2	2	2	2	2	2	2	2	2	2	4	2	2	1	2	2	3	2	1	10	1	1	2	2
1025	1	1	1	2	55	4	4	2	2	11	3	3	4	2	2	2	1	1	2	2	2	2	2	2	2	2	2	2	2	2	1	2	2	2	2	4	3	1	2	2	2	2	2	2	10	1	1	2	2
1137	1	2	1	3	35	3	1	1	1	7	2	3	4	1	3	2	1	1	2	2	1	2	2	2	2	2	2	2	2	2	2	2	2	2	2	4	5	2	1	2	2	2	2	1	9	1	1	2	2
1124	1	2	1	1	1	4	4	2	2	11	3	1	1	1	2	2	2	2	2	2	2	2	2	2	2	2	2	2	2	2	2	2	2	2	2	4	1	3	3	2	2	3	3	1		3	1	2	2
968	1	1	1	2	45	4	4	2	2	9	3	1	1	1	1	2	2	2	2	2	2	2	2	2	2	2	2	2	2	2	2	2	2	2	2	4	7	2	1	2	2	2	2	1	9	2	1	2	2
1476	1	2	1	1	46	4	3	2	1	8	2	2	2	2	3	2	2	2	2	2	2	2	2	2	2	2	2	2	2	2	2	2	2	2	2	4	1	1	2	2	2	2	2	2	10	2	1	2	2
918	1	1	1	5	10	3	4	1	2	6	2	2	3	1	3	1	1	2	2	2	2	2	2	2	2	2	2	2	2	2	2	2	2	2	2	4	2	2	1	2	2	3	2	1	10	3	1	1	2
674	1	1	1	4	4	4	3	2	1	10	3	2	2	1	4	1	1	1	1	1	2	2	2	2	2	2	2	2	2	2	2	2	2	2	2	4	1	2	1	1	2	1	1	1	6	3	1	1	2
655	1	1	1	5	10	4	4	2	2	2	1	1	1	1	3	1	1	1	1	1	2	2	2	2	1	2	2	2	2	2	2	2	2	2	2	4	2	3	3	2	3	1	1	1		3	1	1	2
876	1	1	1	4	4	4	4	2	2	9	3	1	1	1	3	1	1	1	1	2	2	2	2	2	2	2	2	2	2	2	2	2	2	2	2	4	1	3	3	1	3	2	2	1		1	1	1	2
1482	1	2	2	1	36	2	2	1	1	5	1	1	1	2	4	1	1	1	1	1	1	1	2	2	2	2	2	2	1	2	2	2	2	1	2	4	2	2	1	2	1	1	1	1	6	1	1	2	2
1569	1	2	1	4	4	3	4	1	2	10	3	3		1	2	4	1	1	2	2	2	2	2	2	2	2	2	2	2	2	2	2	2	1	2	5	3	2	1	2	2	2	2	1	9	3	1	1	2
1701	1	2	1	3	4	3	2	1	1	10	3	4		2	2	3	1	1	2	2	2	2	1	2	2	2	2	2	2	2	2	2	2	2	2	5	4	1	2	2	2	2	2	2	10	1	1	1	2
1539	1	2	1	4	4	3	4	1	2	10	3	3	3	1	2	3	2	2	2	2	2	2	2	2	2	2	2	2	2	2	2	2	2	2	2	5	7	1	2	2	2	2	2	2	10	1	1	1	1
1565	1	2	1	3	4	3	3	1	1	11	3	1	1	2	4	2	1	1	2	2	2	2	2	2	2	1	2	2	2	2	2	2	2	2	2	5	4	2	1	1	1	2	2	1	7	2	1	1	2
1558	1	4	2	2	13	2	4	1	2	9	3	3		2	2	2	2		2	2	2	2	2	2	2	2	2	2	2	2	2	2	2	2	2	5	7	3	3	3	2	2	2	1		3	1	1	2
1682	1	4	2	2	4	2	4	1	2	9	3	2		2	3	2	2	2	2	2	2	2	2	2	2	2	2	2	2	2	2	2	2	2	2	5	4	1	2	2	2	2	2	2	10	1	1	2	2
1197	1	2	1	3	2	4	4	2	2	5	1	3	4	2	3	4	1	1	2	2	2	2	2	2	2	2	2	2	2	2	2	2	2	1	2	5	2	1	2	2	2	2	2	2	10	3	1	2	2
659	1	1	1	5	10	4	3	2	1	5	1	1	1	2	4	4	1	1	2	2	1	2	2	2	2	2	2	2	2	1	2	2	2	2	2	5	2	3	3	2	2	2	2	1		1	1	2	2
718	1	1	1	3		3	4	1	2	7	2	1	1	1	2	4	2	2	2	2	2	2	2	2	2	2	2	2	2	2	2	2	2	2	2	5	7	1	2	2	2	2	2	2	10	2	1	1	2
828	1	1	1	2	62	4	4	2	2	8	2	4	5	1	1	4	2	2	2	2	2	2	2	2	2	2	2	2	2	2	2	2	2	2	2	5	7	1	2	2	2	2	2	2	10	2	1	1	2
503	1	1	1	5	10	4	4	2	2	9	3	2	3	1	2	3	1	1	2	2	1	2	1	2	2	2	2	2	2	2	2	2	2	2	2	5	4	1	2	2	2	2	2	2	10	3	1	1	2
63	1	1	1	4	4	4	4	2	2	8	2	2	3	1	3	3	1	1	1	1	2	2	2	2	2	2	2	2	2	2	2	2	2	2	2	5	4	1	2	2	2	2	2	2	10	2	1	1	2
29	1	1	1	4	12	4	4	2	2	10	3	1	1	1	3	3	1	1	2	1	2	2	2	1	2	2	2	2	1	2	2	2	2	2	2	5	2	2	1	2	2	3	1	1	9	2	1	2	2
1436	1	2	1	4	4	4	4	2	2	8	2	3	4	2	2	3	1	1	2	2	2	2	2	2	2	2	2	2	2	1	2	2	2	2	2	5	7	1	2	2	2	2	2	2	10	1	1	2	2
273	1	1	1	1	1	4	4	2	2	11	3	1	1	2	2	3	2	2	2	2	2	2	2	2	2	2	2	2	2	2	2	2	2	2	2	5	7	1	2	2	2	2	2	2	10	2	1	1	2
1051	1	1	1	3	2	4	4	2	2	10	3	3	4	1	2	3	2	2	2	2	2	2	2	2	2	2	2	2	2	2	2	2	2	2	2	5	7	2	1	2	2	2	2	1	9	2	1	2	2
653	2	1	1	5	10	4	4	2	2	11	3	3	4	2	2	3	2	2	2	2	2	2	2	2	2	2	2	2	2	2	2	2	2	2	2	5	3	3	3	2	2	2	2	1		2	1	2	2
1344	1	2	1	4	6	4	4	2	2	10	3	2	2	2	1	3	2	2	2	2	2	2	2	2	2	2	2	2	2	2	2	2	2	2	2	5	7	1	2	2	2	2	2	2	10	1	1	2	2
790	1	1	1	1		4	2	2	1	11	3	3	4	2	3	2	1	1	2	1	1	2	2	2	2	2	2	2	2	2	2	2	2	1	2	5	2	3	3	3	3	2	2	1		5	1	1	2
1099	1	1	1	3	5	4	3	2	1	7	2	4	5	2	2	2	1	1	2	2	2	2	2	2	2	2	2	2	2	2	1	2	2	2	2	5	2	1	2	2	2	2	2	2	10	3	1	2	2
43	1	1	1	4	7	4	4	2	2	7	2	2	2	2	3	2	1	1	1	2	2	2	2	2	2	2	2	2	2	2	2	2	2	2	2	5	2	2	1	1	2	2	2	1	8	3	1	2	2
101	1	1	1	4	7	4	4	2	2	7	2	2	2	2	3	2	1	1	1	2	2	2	2	2	2	2	2	2	2	2	2	2	2	2	2	5	2	2	1	1	2	2	2	1	8	3	1	2	2
1064	1	1	1	3	56	4	4	2	2	6	2	4	5	2	3	2	1	1	1	1	2	2	2	2	2	2	2	2	2	2	2	2	2	2	2	5	2	1	2	1	2	2	2	1	9	3	1	2	2
1003	1	3	1	3	5	4	4	2	2	7	2	3	4	2	3	2	1	1	2	1	1	2	2	2	2	2	2	2	2	2	2	2	2	2	2	5	1	3	3	1	2	2	2	1		3	1	2	2
394	1	1	1	3	14	4	4	2	2	2	1	1	1	1	3	2	1	1	1	2	1	2	1	2	2	2	2	2	2	2	2	2	2	1	2	5	2	3	3	2	2	1	3	1		2	1	1	2
938	1	1	1	5	10	4	4	2	2	11	3	2	2	1	3	2	1	1	2	1	2	2	2	2	2	2	2	2	2	2	2	2	2	2	2	5	7	2	1	2	2	2	2	1	9	2	1	1	2
1185	1	2	1	4	6	4	4	2	2	5	1	3	4	1	4	2	1	1	2	2	2	2	2	2	2	1	2	2	1	2	1	2	2	2	2	5	2	2	1	2	2	2	2	1	9	2	1	1	2
711	2	1	1	5	40	4	3	2	1	8	2	2	2	2	4	2	1	1	1	2	2	1	2	2	2	2	2	2	2	2	2	2	2	2	2	5	2	1	2	2	1	2	2	1	9	2	1	1	2
1011	2	1	1	2	49	4	4	2	2	10	3	3	4	1	3	2	1	1	2	2	1	2	2	2	2	2	2	2	2	2	2	2	2	2	2	5	2	3	3	2	2	2	2	1		2	1	1	2
316	1	1	1	4	6	4	4	2	2	11	3	3	4	1	2	2	1	1	1	1	1	2	2	2	2	2	2	2	2	2	2	2	2	2	2	5	2	1	2	2	2	2	2	2	10	2	1	2	2
1485	1	2	1	1	36	4	4	2	2	10	3	3	4	2	3	2	1	1	2	2	2	2	1	2	2	2	2	2	2	2	2	2	2	2	2	5	4	2	1	1	1	1	1	1	5	2	1	2	2
193	1	1	1	4	4	4	3	2	1	8	2	1	1	1	3	2	1	1	2	2	1	1	2	2	2	2	2	2	2	2	2	2	2	2	2	5	1	2	1	2	2	2	2	1	9	2	1	2	2
1257	1	2	1	4	4	3	4	1	2	7	2	2	3	2	2	2	1	1	2	2	2	2	2	2	2	2	2	2	2	1	2	2	2	2	2	5	7	1	2	2	2	2	2	2	10	1	1	1	2
83	1	1	1	4	4	4	4	2	2	10	3	1	1	1	3	2	1	2	2	2	2	2	2	2	2	2	2	2	2	2	2	2	2	2	2	5	3	2	1	1	1	2	2	1	7	1	1	1	2
31	1	1	1	4	12	3	3	1	1	8	2	3	4	2	4	2	1	1	2	2	2	2	1	1	2	2	2	2	2	2	2	2	2	2	2	5	2	3	3	2	2	2	2	1		1	1	1	2
194	1	1	1	3	5	4	4	2	2	8	2	3	4	2	3	2	1	1	2	1	2	2	1	2	2	2	2	2	2	2	2	2	2	2	2	5	7	1	2	2	2	2	2	2	10	1	1	2	2
88	1	1	1	4	4	4	4	2	2	10	3	1	1	1	3	2	1	2	2	2	2	2	2	2	2	2	2	2	2	2	2	2	2	2	2	5	3	2	1	1	1	2	2	1	7	1	1	2	2
1088	2	1	1	5	10	3	4	1	2	11	3	2	3	1	3	2	1	1	2	2	2	2	2	2	2	2	2	2	2	2	2	2	2	1	2	5	3	2	1	2	2	2	2	1	9	1	1	2	2
1430	1	2	1	5	10	4	4	2	2	7	2	2	3	1	1	2	2	2	2	2	2	2	2	2	2	2	2	2	2	2	2	2	2	2	2	5	4	1	2	2	2	2	2	2	10	3	1	2	2
382	1	3	1	5	11	4	4	2	2	4	1	3	4	2	3	2	2	2	2	2	2	2	2	2	2	2	2	2	2	2	2	2	2	2	2	5	2	2	1	2	2	2	2	1	9	2	1	1	1
281	1	1	1	1	68	3	3	1	1	6	2	2	3	2	2	2	2	2	2	2	2	2	2	2	2	2	2	2	2	2	2	2	2	2	2	5	2	3	3	3	2	2	2	1		2	1	1	2
1191	1	2	1	4	4	3	4	1	2	8	2	3	4	2	3	2	2	2	2	2	2	2	2	2	2	2	2	2	2	2	2	2	2	2	2	5	1	2	1	2	2	2	2	1	9	2	1	2	2
734	1	1	1	5		4	4	2	2	10	3	3	4	2	2	2	2	2	2	2	2	2	2	2	2	2	2	2	2	2	2	2	2	2	2	5	2	1	2	2	2	2	2	2	10	1	1	1	2
116	1	1	1	4	4	3	3	1	1	11	3	2	2	2	3	2	2	1	2	1	1	2	2	2	2	2	2	2	2	2	2	2	2	2	2	5	2	3	3	2	2	2	2	1		1	1	1	2
538	2	1	1	4	12	4	3	2	1	11	3	2	3	2	3	2	2	1	2	2	2	2	2	2	2	2	2	2	2	2	2	2	2	1	2	5	7	1	2	2	2	2	2	2	10	1	1	2	2
858	1	1	1	4	4	4	4	2	2	5	1	1	1	2	4	1	1	1	1	1	2	2	2	2	2	2	2	2	2	2	2	2	2	2	2	5	2	3	3	2	2	1	1	1		4	1	1	2
392	1	1	1	5	37	4	4	2	2	7	2	4	5	2	3	1	1	2	2	2	2	2	2	2	2	2	2	2	2	2	2	2	2	2	2	5	2	2	1	2	2	1	1	1	7	2	1	1	2
336	1	3	2	1	52	4	4	2	2	11	3	3	4	1	4	1	1	1	1	2	1	1	2	2	2	2	2	2	1	2	1	2	2	2	2	5	2	2	1	1	1	1	1	1	5	2	1	2	2
176	1	1	1	5	10	4	4	2	2	6	2	2	2	1	4	1	1	1	1	1	2	1	1	2	2	2	2	2	2	2	2	2	2	2	2	5	4	2	1	2	2	1	1	1	7	2	1	2	2
376	1	1	1	4	11	4	3	2	1	4	1	2	2	2	4	1	1	1	2	1	1	2	1	2	1	2	2	2	2	2	2	2	2	2	2	5	4	2	1	2	3	2	2	1	10	2	1	2	2
681	2	1	1	4	7	4	3	2	1	10	3	3	4	1	3	1	1	1	1	2	2	2	2	2	2	2	2	2	2	2	2	2	2	2	2	5	2	2	1	3	1	3	3	1	11	2	1	2	2
111	2	3	1	4	6	2	2	1	1	11	3	4	5	2	3	1	1	1	1	2	2	1	1	2	2	1	2	2	2	2	2	2	2	2	2	5	2	1	2	1	2	2	2	1	9	1	1	1	2
141	1	1	1	1	52	4	4	2	2	10	3	2	3	1	2	1	2	2	2	2	2	2	2	2	2	2	2	2	2	2	2	2	2	2	2	5	2	3	3	2	2	1	1	1		4	1	1	2
1041	1	1	1	1	48	1	2	1	1	3	1	3	4	2	1	1	2	2	2	2	2	2	2	2	2	2	2	2	2	2	2	2	2	2	2	5	1	1	2	2	2	2	2	2	10	1	1	2	2
1648	1	2	1	1	7	2	4	1	2	10	3	2		1	5	4	2		2	2	2	2	2	2	2	2	2	2	2	2	2	2	2	1	1	6		3	3	2	2	2	2	1		3	1	2	2
1696	1	2	1	4	6	3	3	1	1	8	2	1	1	1	1	4	1		2	2	2	1	2	2	2	2	2	2	2	2	2	2	2	2	1	6		1	2	2	2	2	2	2	10	4	1	1	2
1627	1	2	1	4	11	3	2	1	1	2	1	1	1	1	2	4	1	1	2	2	1	2	2	2	2	2	2	2	2	2	1	2	2	2	1	6		1	2	2	2	2	2	2	10	2	1	1	2
1692	1	2	1	4	31	4	4	2	2	3	1	2		2	3	4	1	1	2	1	1	2	2	2	2	2	2	2	2	2	2	2	2	2	1	6		1	2	2	2	3	3	1	12	2	1	2	2
1580	1	2	1	5	10	4	4	2	2	5	1	4		2	1	4	1	1	2	2	2	2	2	2	2	2	2	2	2	2	2	2	2	2	1	6		1	2	2	2	2	2	2	10	1	1	1	2
1631	1	2	1	2	17	4	4	2	2	11	3	3		2	5	4	2		2	2	2	2	2	2	2	2	2	2	2	2	2	2	2	2	1	6		1	2	2	2	2	2	2	10	6	2	2	2
1578	1	2	1	4	4	4	4	2	2	5	1	2		1	2	4	2		2	2	2	2	2	2	2	2	2	2	2	2	2	2	2	2	1	6		1	2	2	2	2	2	2	10	6	2	2	2
1576	1	2	1	4	4	4	3	2	1	4	1	3		1	2	4	2		2	2	2	2	2	2	2	2	2	2	2	2	2	2	2	2	1	6		1	2	2	2	2	2	2	10	6	2	2	2
1566	1	2	1	4	4	4	4	2	2	4	1	4		1	1	4	2		2	2	2	2	2	2	2	2	2	2	2	2	2	2	2	2	1	6		1	2	2	2	2	2	2	10	4	1	1	2
1678	1	2	1	4	4	4	4	2	2	5	1	2		2	1	4	2		2	2	2	2	2	2	2	2	2	2	2	2	2	2	2	2	1	6		1	2	2	2	2	2	2	10	4	1	2	2
1579	1	2	1	1	4	4	3	2	1	4	1	2		1	3	4	2		2	2	2	2	2	2	2	2	2	2	2	2	2	2	2	2	1	6		1	2	2	2	1	1	1	8	4	1	2	2
1554	1	2	1	4	4	3	4	1	2	5	1	2		1	5	4	2		2	2	1	2	2	1	2	2	2	2	2	2	2	2	2	2	1	6		1	2	2	2	2	2	2	10	3	1	1	2
1698	1	2	1	4	6	2	3	1	1	5	1	2		1	1	4	2		2	2	2	2	2	2	2	2	2	2	2	2	2	2	2	2	1	6		1	2	2	2	2	2	2	10	3	1	2	2
1588	1	2	1	4	4	4	4	2	2	3	1	1		2	1	4	2		2	2	2	2	2	2	2	2	2	2	2	2	2	2	2	2	1	6		1	2	2	2	2	2	2	10	2	1	1	2
1697	1	2	1	4	4	4	3	2	1	5	1	3		1	3	4	2		2	2	2	2	2	2	2	2	2	2	2	2	2	2	2	2	1	6		1	2	2	2	2	2	2	10	2	1	1	2
1641	1	2	1	4	4	4	4	2	2	3	1	1		1	1	4	2		2	2	2	2	2	2	2	2	2	2	2	2	2	2	2	2	1	6		1	2	2	2	2	2	2	10	2	1	2	2
1659	1	2	1	4	4	4	4	2	2	4	1	2		2	1	4	2		2	2	2	2	2	2	2	2	2	2	2	2	2	2	2	2	1	6		1	2	2	2	2	2	2	10	2	1	2	2
1690	1	2	1	4	4	3	4	1	2	5	1	3		1	2	4	2	2	2	2	2	2	2	2	2	2	2	2	2	2	2	2	2	2	1	6		1	2	2	2	2	2	2	10	1	1	1	2
1551	1	2	1	4	6	4	4	2	2	2	1	4		2	1	4	2	2	2	2	2	2	2	2	2	2	2	2	2	2	2	2	2	2	1	6		1	2	2	2	2	2	2	10	1	1	1	2
1537	1	2	1	4	6	4	4	2	2	2	1	4	5	2	1	4	2	2	2	2	2	1	2	2	1	2	2	2	2	2	2	2	2	2	1	6		3	3	2	2	1	1	1		1	1	1	2
1555	1	2	1	4	4	4	4	2	2	11	3	2		2	1	4	2	2	2	2	2	2	2	2	2	2	2	2	2	2	2	2	2	2	1	6		1	2	2	2	2	2	2	10	1	1	2	2
1613	1	2	1	4	4	4	4	2	2	6	2	2		1	1	4	2	2	2	2	2	2	2	2	2	2	2	2	2	2	2	2	2	2	1	6		1	2	2	2	2	2	2	10	1	1	2	2
1575	1	2	1	4	32	4	4	2	2	3	1	3		1	1	4	2	2	2	2	2	2	2	2	2	2	2	2	2	2	2	2	2	2	1	6		1	2	2	2	2	2	2	10	1	1	2	2
1646	1	2	1	3	4	4	4	2	2	11	3	3		1	4	3	1	1	2	2	2	2	2	2	2	2	2	2	2	2	2	2	2	2	1	6		2	1	1	2	2	2	1	8	3	1	1	2
1706	1	2	1	5	10	4	3	2	1	7	2	3		1	2	3	1	1	2	2	1	2	2	2	2	2	2	2	2	2	2	2	2	2	1	6		1	2	2	2	2	2	2	10	2	1	1	2
1720	1	2	1	3	19	4	4	2	2	5	1	3		2	2	3	1	1	2	1	1	2	2	2	2	2	2	2	2	2	1	2	2	2	1	6		1	2	2	2	2	2	2	10	2	1	1	2
1600	1	2	1	1	4	4	4	2	2	9	3	3		1	3	3	1	1	2	2	2	2	2	2	2	1	2	2	2	2	2	2	2	2	1	6		1	2	2	2	2	2	2	10	2	1	1	2
1662	1	2	1	4	4	3	4	1	2	6	2	1		2	3	3	1	1	2	2	2	1	2	2	2	2	2	2	2	2	2	2	2	2	1	6		1	2	2	2	2	2	2	10	2	1	2	2
1590	1	2	1	4	4	4	4	2	2	2	1	4		2	1	3	1	1	2	2	2	1	2	2	2	1	2	2	2	1	2	2	2	2	1	6		1	2	2	2	2	2	2	10	1	1	1	2
1632	1	2	1	4	11	3	2	1	1	5	1	2		1	2	3	2		2	1	1	2	2	2	2	1	2	2	2	2	2	2	2	2	1	6		1	2	2	2	2	2	2	10	3	1	1	2
1582	1	2	1	4	4	3	4	1	2	8	2	3		1	2	3	2		2	2	2	2	2	2	2	2	2	2	2	2	2	2	2	2	1	6		1	2	2	2	2	2	2	10	3	1	1	2
1672	1	2	1	4	6	3	2	1	1	7	2	3		1	2	3	2		2	2	2	2	2	2	2	2	2	2	2	2	2	2	2	2	1	6		1	2	2	2	2	2	2	10	3	1	2	2
1679	1	2	1	4	11	4	3	2	1	4	1	2		1	3	3	2		2	2	1	2	2	2	2	2	2	2	2	2	2	2	2	2	1	6		1	2	2	2	2	2	2	10	2	1	2	2
1623	1	2	1	2	4	2	2	1	1	4	1	2		1	4	3	2		2	2	2	2	2	2	2	2	2	2	2	2	2	2	2	2	1	6		2	1	1	1	1	1	1	5	2	1	2	2
1586	1	2	1	5	6	4	4	2	2	2	1	2		2	2	3	2		2	2	2	2	2	2	2	2	2	2	2	2	2	2	2	2	1	6		3	3	3	2	2	2	1		2	1	2	2
1568	1	2	1	4	4	2	3	1	1	11	3	3		2	2	3	2	2	2	2	2	2	2	2	2	2	2	2	2	2	2	2	2	2	1	6		2	1	2	2	2	2	1	9	1	1	1	2
1633	1	2	1	4	4	4	4	2	2	4	1	2	2	2	2	3	2	2	2	2	2	2	2	2	2	2	2	2	2	2	2	2	2	2	1	6		1	2	2	2	2	2	2	10	1	1	1	2
1721	1	2	1	4	4	4	4	2	2	5	1	1		2	2	3	2	2	2	2	2	2	2	2	2	2	2	2	2	2	2	2	2	2	1	6		1	2	2	2	2	2	2	10	1	1	1	2
1704	1	2	1	2	4	3	3	1	1	9	3	3		2	2	3	2	2	2	2	2	2	2	2	2	2	2	2	2	2	2	2	2	2	1	6		3	3	2	2	2	3	1		1	1	1	2
1611	1	2	1	4	4	4	4	2	2	2	1	4		1	1	3	2	2	2	2	2	2	2	2	2	2	2	2	2	2	2	2	2	2	1	6		1	2	2	2	2	2	2	10	1	1	2	2
1619	1	2	1	4	4	4	3	2	1	10	3	2		2	4	2	1	1	2	2	2	2	1	2	2	2	2	2	2	2	2	2	2	2	1	6		2	1	2	2	2	2	1	9	5	1	1	2
1655	1	2	1	4	4	4	4	2	2	7	2	1	1	2	2	2	1	1	2	2	2	2	2	2	2	2	2	2	2	2	2	2	2	2	1	6		1	2	2	2	2	2	2	10	3	1	1	2
1598	1	2	1	3	4	4	4	2	2	8	2	3		1	2	2	1	1	1	2	2	2	2	2	2	2	2	2	2	2	2	2	2	2	1	6		1	2	2	2	2	2	2	10	3	1	1	2
1557	1	2	1	5	10	3	4	1	2	8	2	2		1	2	2	1	1	2	2	2	2	2	2	2	2	2	2	2	2	2	2	2	2	1	6	2	2	1	2	1	2	2	1	8	2	1	1	2
1563	1	2	1	5	10	3	4	1	2	8	2	2		1	2	2	1	1	2	2	2	2	2	2	2	2	2	2	2	2	2	2	2	2	1	6	2	2	1	2	1	2	2	1	8	2	1	1	2
1564	1	2	1	5	10	3	4	1	2	8	2	2		1	2	2	1	1	2	2	2	2	2	2	2	2	2	2	2	2	2	2	2	2	1	6	2	2	1	2	1	2	2	1	8	2	1	1	2
1722	1	2	1	4	4	4	4	2	2	5	1	4		1	1	2	1	1	2	1	2	2	2	2	2	2	2	2	2	2	2	2	2	2	1	6		3	3	3	2	3	3	1		2	1	1	2
1651	1	2	1	1	4	3	2	1	1	4	1	1	1	2	2	2	1	1	2	2	1	1	2	2	2	2	2	2	2	2	1	2	2	2	1	6		3	3	2	3	2	2	1		2	1	2	2
1629	1	2	1	4	4	4	2	2	1	6	2	2		2	2	2	1	1	2	2	2	2	2	2	2	2	2	2	2	2	2	2	2	2	1	6		1	2	2	2	2	2	2	10	1	1	1	2
1605	1	2	1	4	4	3	2	1	1	8	2	3		2	3	2	1	1	2	2	2	2	2	2	2	2	2	2	2	2	1	2	2	2	1	6		2	1	2	2	2	2	1	9	1	1	1	2
1714	1	2	1	4	4	4	4	2	2	10	3	3		2	2	2	1	1	2	2	2	1	2	1	2	2	2	2	2	2	2	2	2	2	1	6		1	2	2	2	2	2	2	10	1	1	2	2
1661	1	2	1	4	6	2	3	1	1	10	3	3		1	2	2	2		2	2	2	2	2	2	2	2	2	2	2	2	2	2	2	2	1	6		1	2	2	2	2	2	2	10	2	1	2	2
1577	1	2	1	4	4	4	4	2	2	7	2	1	1	2	2	2	2	2	2	2	2	2	2	2	2	2	2	2	2	2	2	2	2	2	1	6		1	2	2	2	2	2	2	10	1	1	1	2
1624	1	2	1	2	4	2	2	1	1	2	1	3		1	4	1	2		2	2	2	2	2	2	2	2	2	2	2	2	2	2	2	2	1	6		3	3	3	3	1	1	1		6	2	2	2
1660	1	2	1	4	4	4	3	2	1	10	3	2		1	4	1	2		2	2	2	2	2	2	2	2	2	2	2	2	2	2	2	2	1	6		1	2	2	3	2	2	1	11	2	1	2	2
583	1	1	1	3	10	4	3	2	1	8	2	2	2	1	3	2	1	1	2	2	1	1	2	2	2	2	2	2	2	2	2	2	2	2	1	6		2	1	3	1	3	3	1	11	6	2	1	1
808	1	1	1	5	10	1	3	1	1	11	3	2	2	1	3	2	1	1	2	2	1	2	2	2	2	2	2	2	2	2	2	2	2	2	1	6		3	3	1	1	2	2	1		6	2	1	2
496	2	1	1	5	10	4	4	2	2	11	3	3	4	1	4	2	1	1	2	1	1	2	2	2	2	2	2	2	2	2	2	2	2	1	1	6		3	3	3	2	2	2	1		6	2	1	2
182	1	1	1	1	6	4	4	2	2	4	1	3	4	1	2	2	1	1	2	2	1	2	2	2	2	2	2	2	2	2	2	2	2	2	1	6		1	2	2	2	2	3	1	11	4	1	2	2
228	1	1	1	4	4	4	4	2	2	7	2	2	2	1	2	2	1	1	2	1	2	2	2	2	2	2	2	2	2	2	2	2	2	2	1	6		2	1	2	3	2	2	1	10	2	1	2	2
737	2	3	1	4		4	3	2	1	11	3	3	4	1	5	4	2	2	2	2	2	2	2	2	2	2	2	2	2	2	2	2	2	2	1	6		3	3	3	3	3	3	1		6	2	1	1
955	1	1	1	2	45	4	4	2	2	3	1	3	4	1	3	4	2	2	2	2	2	2	2	2	2	2	2	2	2	2	2	2	2	2	1	6		3	3	3	3	1	1	1		6	2	1	2
824	1	1	1	5	68	3	3	1	1	2	1	2	2	2	1	4	2	1	2	2	1	2	2	2	2	2	1	2	2	2	2	2	2	2	1	6		1	2	2	2	2	2	2	10	6	2	1	2
822	1	1	1	5	10	3	4	1	2	3	1	2	2	1	3	4	2	2	2	2	2	2	2	2	2	2	2	2	2	2	2	2	2	2	1	6		3	3	2	2	2	2	1		6	2	1	2
1092	1	1	1	3	2	4	4	2	2	4	1	2	2	1	1	4	2	2	2	2	2	2	2	2	2	2	2	2	2	2	2	2	2	2	1	6		3	3	2	2	2	2	1		6	2	1	2
1103	1	1	1	3	5	4	4	2	2	2	1	4	5	1	2	4	2	2	2	2	2	2	2	2	2	2	2	2	2	2	2	2	2	2	1	6		3	3	2	2	2	2	1		6	2	2	2
522	1	1	1	5	10	4	3	2	1	2	1	2	3	2	2	4	2	1	2	2	2	2	2	2	2	2	2	2	2	2	2	2	2	1	1	6		3	3	2	2	2	2	1		6	2	2	2
1530	1	2	1	4	7	4	4	2	2	5	1	3	4	1	3	4	2	1	2	2	2	2	2	2	2	2	2	2	2	2	2	2	2	1	1	6	1	1	2	2	2	2	2	2	10	6	2	2	2
952	1	3	1	4	6	4	4	2	2	3	1	4	5	1	2	4	2	2	2	2	2	2	2	2	2	2	2	2	2	2	2	2	2	2	1	6		1	2	2	2	2	2	2	10	4	1	1	2
190	1	1	1	1	46	4	4	2	2	10	3	1	1	1	2	4	2	2	2	2	2	2	2	2	2	2	2	2	2	2	2	2	2	2	1	6		1	2	2	2	2	2	2	10	4	1	2	2
429	2	1	1	5	10	3	4	1	2	7	2	1	1	2	2	4	2	2	2	2	2	2	2	2	2	2	2	2	2	2	2	2	2	2	1	6	2	1	2	2	2	2	2	2	10	3	1	2	2
971	2	1	1	2	45	4	4	2	2	2	1	4	5	2	2	4	2	2	2	2	2	2	2	2	2	2	2	2	2	2	2	2	2	2	1	6		1	2	2	3	2	2	1	11	3	1	2	2
236	1	1	1	4	6	4	2	2	1	3	1	4	5	1	2	4	2	1	2	2	2	2	2	2	2	2	2	2	1	2	2	2	2	2	1	6		3	3	2	2	1	1	1		2	1	1	1
32	1	1	1	4	4	2	3	1	1	4	1	3	4	2	3	4	2	1	2	2	2	2	2	2	2	1	2	2	2	2	2	2	2	2	1	6		1	2	2	2	2	2	2	10	2	1	1	2
473	1	1	1	5	64	4	4	2	2	4	1	1	1	2	1	4	2	2	2	2	2	2	2	2	2	2	2	2	2	2	2	2	2	2	1	6		1	2	2	2	2	2	2	10	2	1	1	2
831	2	1	1	5	10	2	2	1	1	7	2	4	5	1	1	4	2	2	2	2	2	2	2	2	2	2	2	2	2	2	2	2	2	2	1	6		1	2	2	3	2	2	1	11	2	1	1	2
943	2	1	1	5	10	4	4	2	2	7	2	3	4	1	2	4	2	2	2	2	2	2	2	2	2	2	2	2	2	2	2	2	2	2	1	6		1	2	2	2	2	2	2	10	2	1	1	2
242	1	1	1	4	6	4	2	2	1	3	1	4	5	1	2	4	2	1	2	2	2	2	2	2	2	2	2	2	1	2	2	2	2	2	1	6		3	3	2	2	1	1	1		2	1	2	1
579	1	1	1	5	10	4	4	2	2	9	3	2	2	1	2	4	2	2	2	2	2	2	2	2	2	2	2	2	2	2	2	2	2	2	1	6		1	2	2	2	2	2	2	10	2	1	2	2
46	1	1	1	4	4	4	4	2	2	2	1	2	3	2	1	4	2	1	2	2	2	2	2	2	2	2	2	2	2	2	2	2	2	1	1	6		3	3	2	2	2	2	1		2	1	2	2
218	1	1	1	5	10	3	4	1	2	3	1	1	1	2	2	4	2	2	2	2	2	2	2	2	2	2	2	2	2	2	2	2	2	2	1	6		3	3	2	2	3	3	1		2	1	2	2
602	1	1	1	5	10	4	4	2	2	6	2	3	4	2	1	4	2	2	2	2	2	2	2	2	2	2	2	2	2	2	2	2	2	2	1	6		1	2	2	2	2	2	2	10	1	1	2	1
1097	1	1	1	3	2	4	4	2	2	3	1	2	2	1	2	4	2	2	2	2	2	2	2	2	2	2	2	2	2	2	2	2	2	2	1	6		1	2	2	2	2	2	2	10	1	1	2	2
1043	2	1	1	5	30	4	4	2	2	4	1	1	1	2	3	4	2	2	2	2	2	2	2	2	2	2	2	2	2	2	2	2	2	2	1	6		3	3	3	3	3	3	1		1	1	2	2
835	1	1	1	2	53	4	4	2	2	10	3	3	4	1	4	4	1	1	2	2	1	2	2	2	2	2	2	2	2	2	2	2	2	2	1	6		1	2	2	2	2	2	2	10	6	2	2	2
973	2	1	1	2	45	4	4	2	2	2	1	4	5	1	1	4	1	1	2	2	1	2	2	2	2	2	2	2	2	2	2	2	2	2	1	6		1	2	2	2	2	2	2	10	6	2	2	2
717	1	3	1	2		4	3	2	1	8	2	3	4	1	2	4	1	1	2	2	1	2	2	2	2	2	2	2	2	2	2	2	2	2	1	6		3	3	2	2	2	2	1		6	2	2	2
1458	1	2	1	1	1	4	3	2	1	4	1	3	4	2	3	4	1	1	2	2	2	2	2	2	2	2	2	2	2	2	2	2	2	1	1	6		3	3	2	2	2	2	1		5	1	1	2
890	1	1	1	2	45	4	4	2	2	3	1	2	2	1	2	4	1	1	2	2	1	2	2	1	2	2	2	2	2	2	1	2	2	2	1	6		1	2	2	2	1	1	1	8	5	1	2	2
841	1	1	1	5	7	4	4	2	2	5	1	1	1	2	3	4	1	1	2	1	2	2	2	2	2	2	2	2	2	2	2	2	2	2	1	6		2	1	2	2	2	2	1	9	4	1	1	2
1388	1	2	1	4	4	4	4	2	2	5	1	1	1	2	2	4	1	1	2	2	2	2	2	2	2	2	2	2	2	2	1	2	2	2	1	6		1	2	2	2	2	2	2	10	4	1	2	1
651	1	1	1	5	10	4	4	2	2	4	1	1	1	1	2	4	1	1	2	1	2	2	2	2	2	2	2	2	2	2	2	2	2	2	1	6		1	2	2	2	2	2	2	10	3	1	1	2
1160	1	2	1	1	1	4	4	2	2	4	1	3	4	2	2	4	1	1	2	2	2	2	2	2	2	2	2	2	2	2	2	2	2	1	1	6		1	2	2	2	2	2	2	10	3	1	1	2
458	1	1	1	4	4	4	4	2	2	5	1	2	3	2	3	4	1	1	2	2	2	2	2	2	2	2	2	2	2	2	2	2	2	1	1	6		3	3	2	2	2	2	1		3	1	1	2
643	1	1	1	1	48	4	3	2	1	6	2	1	1	1	2	4	1	2	2	2	2	2	2	2	2	2	2	2	2	2	2	2	2	2	1	6		1	2	2	2	2	2	2	10	3	1	2	2
817	1	1	1	3	9	4	3	2	1	7	2	4	5	2	3	4	1	1	2	2	1	1	2	2	2	2	2	2	2	2	2	2	2	2	1	6		1	2	2	2	2	2	2	10	3	1	2	2
972	1	1	1	5	10	4	4	2	2	3	1	4	5	2	1	4	1	1	2	2	2	2	2	2	2	2	2	2	2	2	1	2	2	2	1	6		1	2	2	2	2	2	2	10	3	1	2	2
1467	1	2	1	1	1	4	4	2	2	11	3	3	4	1	4	4	1	1	2	1	2	2	2	2	2	2	2	2	2	2	2	2	2	2	1	6		2	1	1	1	2	2	1	7	3	1	2	2
1510	1	2	1	5	10	4	4	2	2	11	3	3	4	1	2	4	1	1	2	1	1	2	2	2	2	2	2	2	2	2	2	1	2	2	1	6		3	3	2	2	2	2	1		3	1	2	2
144	1	1	1	1	52	4	3	2	1	6	2	1	1	1	1	4	1	1	2	2	2	2	2	2	2	2	2	2	2	1	2	2	2	2	1	6		1	2	2	2	2	1	1	9	2	1	1	1
1524	1	2	1	3	2	4	3	2	1	4	1	4	5	1	2	4	1	1	2	1	1	2	2	2	2	2	2	2	2	2	2	2	2	2	1	6		1	2	2	2	2	2	2	10	2	1	1	2
804	2	1	1	3	19	3	4	1	2	2	1	4	5	1	1	4	1	1	2	1	2	2	2	2	2	2	2	2	2	2	2	2	2	2	1	6		1	2	2	2	2	2	2	10	2	1	1	2
1513	1	2	1	1	1	4	3	2	1	5	1	1	1	1	2	4	1	1	2	2	2	2	2	2	2	2	2	1	2	2	1	2	2	2	1	6		1	2	2	2	2	2	2	10	2	1	1	2
757	1	1	1	4		4	3	2	1	2	1	3	4	1	1	4	1	1	2	2	2	2	2	2	2	2	2	2	2	2	1	2	2	2	1	6		1	2	2	2	2	2	2	10	2	1	1	2
1072	1	1	1	3	2	3	4	1	2	5	1	1	1	2	2	4	1	1	2	2	2	2	2	2	2	2	2	2	2	2	1	2	2	2	1	6		1	2	2	2	2	2	2	10	2	1	2	2
765	1	1	1	5		3	3	1	1	11	3	3	4	1	3	4	1	1	2	2	1	2	2	2	2	2	2	2	2	2	2	2	2	2	1	6		1	2	2	2	2	2	2	10	2	1	2	2
616	1	1	1	5	10	4	4	2	2	11	3	3	4	1	2	4	1	1	2	1	2	2	2	2	2	2	2	2	2	2	2	2	2	2	1	6		1	2	2	2	2	2	2	10	2	1	2	2
949	1	1	1	2	45	4	4	2	2	7	2	4	5	2	3	4	1	1	2	1	2	2	2	2	2	2	2	2	2	2	2	2	2	2	1	6		2	1	2	2	2	2	1	9	2	1	2	2
1123	1	2	1	3	2	4	4	2	2	3	1	3	4	1	4	4	1	1	2	1	2	2	2	2	2	2	2	2	2	2	2	2	2	2	1	6		3	3	2	2	1	2	1		2	1	2	2
45	1	1	1	4	4	4	4	2	2	8	2	1	1	1	5	4	1	2	2	2	2	2	2	2	2	2	2	2	2	2	2	2	2	2	1	6		3	3	2	2	2	2	1		1	1	1	2
106	1	1	1	4	4	4	4	2	2	4	1	2	2	2	1	4	1	1	2	2	1	2	2	2	2	2	2	2	2	2	2	2	2	2	1	6		1	2	2	2	2	2	2	10	1	1	2	2
487	1	1	1	5	30	4	4	2	2	3	1	4	5	1	3	4	2	2	2	2	2	2	2	2	2	2	2	2	2	2	2	2	2	2	1	6		2	1	2	2	3	3	1	11	6	2	1	1
739	1	1	1	4		4	4	2	2	2	1	1	1	1	2	4	2	2	2	2	2	2	2	2	2	2	2	2	2	2	2	2	2	2	1	6		1	2	2	2	2	2	2	10	6	2	1	2
1034	2	1	1	1	69	4	3	2	1	2	1	4	5	2	1	4	2	1	2	2	2	2	2	2	2	2	2	2	2	2	2	2	2	1	1	6	7	1	2	2	2	2	2	2	10	6	2	1	2
452	2	3	1	5	10	4	4	2	2	2	1	4	5	2	1	4	2	1	2	2	2	2	2	2	2	2	2	2	2	2	2	2	2	1	1	6		1	2	2	2	2	2	2	10	6	2	1	2
1040	2	1	1	5	10	4	4	2	2	2	1	2	2	1	1	4	2	2	2	2	2	2	2	2	2	2	2	2	2	2	2	2	2	2	1	6		3	3	2	2	2	2	1		6	2	1	2
582	1	1	1	3	51	4	3	2	1	5	1	1	1	2	1	4	2	1	2	2	1	2	2	2	2	2	2	2	2	2	2	2	2	2	1	6		1	2	2	2	2	2	2	10	6	2	1	2
154	1	1	1	1	52	4	4	2	2	3	1	1	1	1	3	4	2	2	2	2	2	2	2	2	2	2	2	2	2	2	2	2	2	2	1	6		1	2	2	2	2	2	2	10	6	2	1	2
199	1	1	1	3	5	4	3	2	1	3	1	3	4	1	1	4	2	2	2	2	2	2	2	2	2	2	2	2	2	2	2	2	2	2	1	6		1	2	2	2	2	2	2	10	6	2	1	2
432	1	1	1	4	11	4	4	2	2	3	1	4	5	1	2	4	2	2	2	2	2	2	2	2	2	2	2	2	2	2	2	2	2	2	1	6		1	2	2	2	2	2	2	10	6	2	1	2
27	1	1	1	5	4	4	4	2	2	2	1	4	5	1	2	4	2	1	2	2	2	2	2	2	2	2	2	2	1	2	2	2	2	2	1	6		2	1	2	2	1	1	1	7	6	2	1	2
179	1	1	1	1	8	3	3	1	1	2	1	3	4	2	3	4	2	1	2	2	1	2	2	2	2	2	2	2	2	2	2	2	2	2	1	6		3	3	2	2	1	1	1		6	2	1	2
551	1	1	1	5	10	4	4	2	2	4	1	3	4	1	3	4	2	1	2	2	1	2	2	2	2	2	2	2	2	2	2	2	2	2	1	6		3	3	2	2	2	2	1		6	2	1	2
488	2	1	1	5	40	4	4	2	2	2	1	4	5	1	1	4	2	2	2	2	2	2	2	2	2	2	2	2	2	2	2	2	2	2	1	6		1	2	3	3	2	2	1	12	6	2	2	2
1022	2	1	1	2	55	4	4	2	2	2	1	2	3	1	2	4	2	2	2	2	2	2	2	2	2	2	2	2	2	2	2	2	2	2	1	6		1	2	2	2	2	2	2	10	6	2	2	2
872	1	1	1	3	2	3	4	1	2	11	3	2	2	2	1	4	2	2	2	2	2	2	2	2	2	2	2	2	2	2	2	2	2	2	1	6		1	2	2	2	2	2	2	10	6	2	2	2
368	1	1	1	5	10	3	4	1	2	3	1	3	4	1	1	4	2	2	2	2	2	2	2	2	2	2	2	2	2	2	2	2	2	2	1	6		1	2	2	2	2	2	2	10	6	2	2	2
459	2	1	1	5	10	3	4	1	2	2	1	4	5	1	1	4	2	2	2	2	2	2	2	2	2	2	2	2	2	2	2	2	2	2	1	6		1	2	2	3	2	2	1	11	6	2	2	2
331	1	1	1	1	36	4	4	2	2	3	1	3	4	1	2	4	2	2	2	2	2	2	2	2	2	2	2	2	2	2	2	2	2	2	1	6		3	3	3	2	2	3	1		6	2	2	2
1283	1	2	1	3	14	4	4	2	2	3	1	3	4	1	1	4	2	2	2	2	2	2	2	2	2	2	2	2	2	2	2	2	2	2	1	6		1	2	2	2	2	2	2	10	6	2	2	2
333	1	1	1	1	36	4	4	2	2	3	1	2	3	2	3	4	2	2	2	2	2	2	2	2	2	2	2	2	2	2	2	2	2	2	1	6		1	2	2	2	2	2	2	10	5	1	1	1
207	1	1	1	4	6	4	3	2	1	8	2	1	1	1	1	4	2	2	2	2	2	2	2	2	2	2	2	2	2	2	2	2	2	2	1	6		1	2	2	2	2	2	2	10	5	1	1	2
1291	1	2	1	3	5	4	4	2	2	4	1	1	1	1	2	4	2	2	2	2	2	2	2	2	2	2	2	2	2	2	2	2	2	2	1	6		1	2	2	2	2	2	2	10	5	1	1	2
465	1	1	1	5	40	4	4	2	2	4	1	2	3	2	2	4	2	2	2	2	2	2	2	2	2	2	2	2	2	2	2	2	2	2	1	6		1	2	2	2	2	2	2	10	5	1	1	2
414	1	1	1	5	10	4	4	2	2	5	1	2	2	1	1	4	2	2	2	2	2	2	2	2	2	2	2	2	2	2	2	2	2	2	1	6		1	2	2	2	2	2	2	10	5	1	1	2
574	1	1	1	4	4	4	4	2	2	8	2	2	2	2	2	4	2	1	2	2	2	2	1	2	2	2	2	2	2	2	2	2	2	2	1	6		1	2	2	2	2	2	2	10	5	1	1	2
519	1	1	1	2	53	4	4	2	2	3	1	4	5	1	2	4	2	2	2	2	2	2	2	2	2	2	2	2	2	2	2	2	2	2	1	6		1	2	2	2	2	2	2	10	5	1	1	2
692	1	3	1	5	2	4	4	2	2	3	1	1	1	2	1	4	2	2	2	2	2	2	2	2	2	2	2	2	2	2	2	2	2	2	1	6		3	3	2	2	2	2	1		5	1	1	2
1433	1	2	1	5	10	4	3	2	1	3	1	4	5	1	5	4	2	2	2	2	2	2	2	2	2	2	2	2	2	2	2	2	2	2	1	6		3	3	2	3	1	1	1		5	1	1	2
284	1	1	1	4	4	4	3	2	1	5	1	3	4	1	1	4	2	2	2	2	2	2	2	2	2	2	2	2	2	2	2	2	2	2	1	6		1	2	2	2	2	2	2	10	5	1	2	1
1027	1	1	1	5	30	4	4	2	2	3	1	2	2	2	2	4	2	1	2	1	1	2	2	2	2	2	2	2	2	2	2	2	2	2	1	6		3	3	2	2	2	2	1		5	1	2	1
1523	1	2	1	3	5	4	3	2	1	4	1	2	3	1	2	4	2	2	2	2	2	2	2	2	2	2	2	2	2	2	2	2	2	2	1	6		3	3	2	2	2	2	1		5	1	2	2
413	1	1	1	3	26	4	4	2	2	5	1	2	2	1	1	4	2	2	2	2	2	2	2	2	2	2	2	2	2	2	2	2	2	2	1	6		1	2	2	2	2	2	2	10	5	1	2	2
422	1	1	1	5	10	4	3	2	1	4	1	3	4	1	1	4	2	2	2	2	2	2	2	2	2	2	2	2	2	2	2	2	2	2	1	6		1	2	2	2	2	2	2	10	5	1	2	2
244	1	1	1	3	2	4	4	2	2	3	1	3	4	2	2	4	2	2	2	2	2	2	2	2	2	2	2	2	2	2	2	2	2	2	1	6		1	2	2	2	2	2	2	10	5	1	2	2
1058	1	1	1	3	2	4	4	2	2	2	1	4	5	1	2	4	2	2	2	2	2	2	2	2	2	2	2	2	2	2	2	2	2	2	1	6		1	2	2	2	2	2	2	10	5	1	2	2
633	2	1	1	5	10	3	4	1	2	2	1	4	5	2	1	4	2	2	2	2	2	2	2	2	2	2	2	2	2	2	2	2	2	2	1	6		3	3	2	2	2	2	1		5	1	2	2
763	1	1	1	5		1	4	1	2	3	1	4	5	2	1	4	2	2	2	2	2	2	2	2	2	2	2	2	2	2	2	2	2	2	1	6		3	3	2	2	2	2	1		5	1	2	2
851	1	1	1	3	14	4	4	2	2	2	1	2	3	2	1	4	2	2	2	2	2	2	2	2	2	2	2	2	2	2	2	2	2	2	1	6		1	2	2	2	2	2	2	10	5	1	2	2
840	2	1	1	5	10	2	4	1	2	11	3	3	4	1	2	4	2	2	2	2	2	2	2	2	2	2	2	2	2	2	2	2	2	2	1	6		1	2	2	2	2	2	2	10	4	1	1	2
997	1	1	1	5	10	1	2	1	1	10	3	3	4	1	1	4	2	2	2	2	2	2	2	2	2	2	2	2	2	2	2	2	2	2	1	6		1	2	2	2	2	2	2	10	4	1	1	2
253	1	1	1	4	4	4	3	2	1	6	2	3	4	1	1	4	2	2	2	2	2	2	2	2	2	2	2	2	2	2	2	2	2	2	1	6		1	2	2	2	2	2	2	10	4	1	1	2
421	1	3	1	5	10	4	4	2	2	2	1	3	4	2	3	4	2	2	2	2	2	2	2	2	2	2	2	2	2	2	2	2	2	2	1	6		1	2	2	2	2	2	2	10	4	1	1	2
523	1	1	1	5	10	3	4	1	2	4	1	3	4	1	1	4	2	2	2	2	2	2	2	2	2	2	2	2	2	2	2	2	2	2	1	6		3	3	2	2	2	3	1		4	1	1	2
1136	1	2	1	3	51	3	4	1	2	5	1	1	1	2	2	4	2	2	2	2	2	2	2	2	2	2	2	2	2	2	2	2	2	2	1	6		1	2	1	2	2	1	1	8	4	1	1	2
931	1	3	1	5	72	3	3	1	1	9	3	1	1	1	1	4	2	1	2	1	2	2	2	2	2	2	2	2	2	2	2	2	2	2	1	6		1	2	2	2	2	2	2	10	4	1	1	2
1282	1	2	1	3	9	4	4	2	2	2	1	1	1	2	1	4	2	2	2	2	2	2	2	2	2	2	2	2	2	2	2	2	2	2	1	6		1	2	2	2	2	2	2	10	4	1	1	2
965	1	1	1	2	45	4	4	2	2	4	1	1	1	1	1	4	2	2	2	2	2	2	2	2	2	2	2	2	2	2	2	2	2	2	1	6		1	2	2	2	2	2	2	10	4	1	1	2
588	1	1	1	5	34	1	4	1	2	6	2	1	1	1	2	4	2	2	2	2	2	2	2	2	2	2	2	2	2	2	2	2	2	2	1	6		1	2	2	2	2	2	2	10	4	1	1	2
807	1	1	1	4	4	4	3	2	1	4	1	2	3	1	1	4	2	2	2	2	2	2	2	2	2	2	2	2	2	2	2	2	2	2	1	6		1	2	2	2	2	2	2	10	4	1	1	2
959	1	1	1	2	45	3	4	1	2	3	1	3	4	1	1	4	2	2	2	2	2	2	2	2	2	2	2	2	2	2	2	2	2	2	1	6		1	2	2	2	2	2	2	10	4	1	1	2
1454	1	2	1	3	14	4	4	2	2	4	1	2	3	1	2	4	2	2	2	2	2	2	2	2	2	2	2	2	2	2	2	2	2	2	1	6		1	2	2	2	3	2	1	11	4	1	1	2
1223	1	2	1	5	10	3	4	1	2	4	1	2	3	1	2	4	2	2	2	2	2	2	2	2	2	2	2	2	2	2	2	2	2	2	1	6		1	2	3	2	2	2	1	11	4	1	1	2
357	1	3	2	5	10	4	4	2	2	8	2	3	4	1	3	4	2	2	2	2	2	2	2	2	2	2	2	2	2	2	2	2	2	2	1	6		3	3	3	2	3	2	1		4	1	1	2
168	1	1	1	1	36	4	4	2	2	3	1	2	3	2	1	4	2	2	2	2	2	2	2	2	2	2	2	2	2	2	2	2	2	2	1	6		1	2	2	2	2	2	2	10	4	1	2	2
819	2	1	1	4	4	4	2	2	1	3	1	2	2	2	1	4	2	2	2	2	2	2	2	2	2	2	2	2	2	2	2	2	2	2	1	6		1	2	2	2	2	2	2	10	4	1	2	2
738	1	1	1	2		4	3	2	1	2	1	2	2	2	1	4	2	2	2	2	2	2	2	2	2	2	2	2	2	2	2	2	2	2	1	6		1	2	2	2	2	2	2	10	4	1	2	2
1098	1	1	1	3	5	4	4	2	2	6	2	2	2	1	2	4	2	2	2	2	2	2	2	2	2	2	2	2	2	2	2	2	2	2	1	6	7	1	2	2	2	2	2	2	10	4	1	2	2
1004	1	1	1	5	30	4	2	2	1	7	2	3	4	2	2	4	2	2	2	2	2	2	2	2	2	2	2	2	2	2	2	2	2	2	1	6		1	2	2	2	2	2	2	10	4	1	2	2
484	1	1	1	5	10	4	3	2	1	11	3	3	4	1	3	4	2	2	2	2	2	2	2	2	2	2	2	2	2	2	2	2	2	2	1	6		1	2	2	2	2	2	2	10	4	1	2	2
852	1	1	1	5	28	4	3	2	1	2	1	3	4	1	2	4	2	2	2	2	2	2	2	2	2	2	2	2	2	2	2	2	2	2	1	6		1	2	2	2	2	2	2	10	4	1	2	2
539	1	1	1	5	10	4	4	2	2	8	2	3	4	2	4	4	2	2	2	2	2	2	2	2	2	2	2	2	2	2	2	2	2	2	1	6		1	2	2	2	2	2	2	10	4	1	2	2
433	1	1	1	5	10	4	4	2	2	3	1	3	4	2	1	4	2	2	2	2	2	2	2	2	2	2	2	2	2	2	2	2	2	2	1	6		1	2	2	2	2	2	2	10	4	1	2	2
1091	1	1	1	3	5	4	4	2	2	2	1	4	5	2	1	4	2	2	2	2	2	2	2	2	2	2	2	2	2	2	2	2	2	2	1	6		1	2	2	2	2	2	2	10	4	1	2	2
377	2	1	1	4	11	4	4	2	2	6	2	4	5	1	2	4	2	2	2	2	2	2	2	2	2	2	2	2	2	2	2	2	2	2	1	6		2	1	2	1	2	2	1	8	4	1	2	2
975	1	1	1	5	10	4	4	2	2	2	1	1	1	1	1	4	2	2	2	2	2	2	2	2	2	2	2	2	2	2	2	2	2	2	1	6		3	3	2	2	2	2	1		4	1	2	2
612	1	1	1	2	53	4	4	2	2	4	1	4	5	2	1	4	2	2	2	2	2	2	2	2	2	2	2	2	2	2	2	2	2	2	1	6		3	3	2	2	2	2	1		4	1	2	2
139	1	1	1	1	36	4	4	2	2	3	1	2	3	1	1	4	2	2	2	2	2	2	2	2	2	2	2	2	2	2	2	2	2	2	1	6		1	2	2	2	2	2	2	10	3	1	1	2
884	1	1	1	5	10	4	3	2	1	3	1	2	3	1	2	4	2	2	2	2	2	2	2	2	2	2	2	2	2	2	2	2	2	2	1	6		1	2	2	2	2	2	2	10	3	1	1	2
124	1	3	2	2	4	2	3	1	1	5	1	3	4	2	1	4	2	2	2	2	2	2	2	2	2	2	2	2	2	2	2	2	2	2	1	6		1	2	2	2	2	2	2	10	3	1	1	2
820	1	1	2	5	50	2	4	1	2	5	1	3	4	2	1	4	2	2	2	2	2	2	2	2	2	2	2	2	2	2	2	2	2	2	1	6		1	2	2	2	2	2	2	10	3	1	1	2
1200	1	2	1	3	2	4	4	2	2	2	1	4	5	2	1	4	2	2	2	2	2	2	2	2	2	2	2	2	2	2	2	2	2	2	1	6		1	2	2	2	2	2	2	10	3	1	1	2
468	1	1	1	5	64	4	4	2	2	3	1	4	5	2	1	4	2	2	2	2	2	2	2	2	2	2	2	2	2	2	2	2	2	2	1	6		1	2	2	2	2	2	2	10	3	1	1	2
634	1	1	1	5	10	4	4	2	2	4	1	4	5	1	2	4	2	2	2	2	2	2	2	2	2	2	2	2	2	2	2	2	2	2	1	6		1	2	2	2	2	2	2	10	3	1	1	2
622	1	1	1	5	10	4	3	2	1	4	1	4	5	2	4	4	2	1	2	1	2	2	2	2	2	2	2	2	2	2	1	2	2	2	1	6		2	1	2	1	1	1	1	6	3	1	1	2
969	1	1	1	2	45	3	4	1	2	10	3	4	5	2	2	4	2	2	2	2	2	2	2	2	2	2	2	2	2	2	2	2	2	2	1	6		2	1	2	2	2	2	1	9	3	1	1	2
909	1	3	1	5	30	4	4	2	2	10	3	1	1	2	2	4	2	2	2	2	2	2	2	2	2	2	2	2	2	2	2	2	2	2	1	6		3	3	2	2	2	2	1		3	1	1	2
662	1	1	1	1	52	4	3	2	1	4	1	4	5	1	1	4	2	2	2	2	2	2	2	2	2	2	2	2	2	2	2	2	2	2	1	6		3	3	2	2	2	2	1		3	1	1	2
1251	1	2	1	3	19	3	4	1	2	6	2	1	1	1	1	4	2	2	2	2	2	2	2	2	2	2	2	2	2	2	2	2	2	2	1	6		1	2	2	2	2	2	2	10	3	1	1	2
206	1	1	1	1	46	4	4	2	2	9	3	2	3	1	1	4	2	2	2	2	2	2	2	2	2	2	2	2	2	2	2	2	2	2	1	6		1	2	2	2	2	2	2	10	3	1	2	2
344	1	1	1	4	7	4	4	2	2	6	2	4	5	2	1	4	2	2	2	2	2	2	2	2	2	2	2	2	2	2	2	2	2	2	1	6		1	2	2	2	2	2	2	10	3	1	2	2
958	1	1	1	4	6	4	4	2	2	5	1	2	2	1	2	4	2	2	2	2	2	2	2	2	2	2	2	2	2	2	2	2	2	2	1	6		1	2	2	2	2	2	2	10	3	1	2	2
372	1	1	1	1	36	4	4	2	2	3	1	2	3	1	1	4	2	2	2	2	2	2	2	2	2	2	2	2	2	2	2	2	2	2	1	6		1	2	2	2	2	2	2	10	3	1	2	2
1073	1	1	1	3	2	3	4	1	2	6	2	3	4	2	2	4	2	2	2	2	2	2	2	2	2	2	2	2	2	2	2	2	2	2	1	6		1	2	2	2	2	2	2	10	3	1	2	2
550	1	1	1	5	10	3	4	1	2	9	3	3	4	1	2	4	2	2	2	2	2	2	2	2	2	2	2	2	2	2	2	2	2	2	1	6		1	2	2	2	2	2	2	10	3	1	2	2
297	1	1	1	3	19	4	3	2	1	4	1	2	3	1	1	4	2	2	2	2	2	2	2	2	2	2	2	2	2	2	2	2	2	2	1	6		3	3	2	2	2	2	1		3	1	2	2
1090	1	1	1	3	5	4	4	2	2	3	1	2	3	2	1	4	2	2	2	2	2	2	2	2	2	2	2	2	2	2	2	2	2	2	1	6		3	3	2	2	2	2	1		3	1	2	2
773	2	3	1	4		4	4	2	2	8	2	3	4	2	3	4	2	2	2	2	2	2	2	2	2	2	2	2	2	2	2	2	2	2	1	6		3	3	2	2	3	3	1		3	1	2	2
455	1	1	1	5	10	4	4	2	2	10	3	1	1	1	2	4	2	2	2	2	2	2	2	2	2	2	2	2	2	2	2	2	2	2	1	6		1	2	2	2	2	2	2	10	3	1	2	2
888	1	1	1	4	11	3	3	1	1	2	1	4	5	2	1	4	2	2	2	2	2	2	2	2	2	2	2	2	2	2	2	2	2	2	1	6		1	2	2	2	2	2	2	10	3	1	2	2
1180	1	2	1	3	2	4	4	2	2	2	1	2	3	1	1	4	2	2	2	2	2	2	2	2	2	2	2	2	2	2	2	2	2	2	1	6		1	2	2	2	2	2	2	10	3	1	2	2
1174	1	2	1	4	4	4	4	2	2	6	2	3	4	1	2	4	2	2	2	2	2	2	2	2	2	2	2	2	2	2	2	2	2	2	1	6		1	2	2	2	2	2	2	10	3	1	2	2
593	1	1	1	3	2	2	4	1	2	4	1	1	1	1	2	4	2	2	2	2	2	2	2	2	2	2	2	2	2	2	2	2	2	2	1	6		1	2	2	2	2	2	2	10	2	1	1	1
268	1	1	1	4	4	3	3	1	1	7	2	3	4	1	1	4	2	2	2	2	2	2	2	2	2	2	2	2	2	2	2	2	2	2	1	6		1	2	2	2	2	2	2	10	2	1	1	1
1391	1	2	1	4	12	4	4	2	2	3	1	4	5	1	1	4	2	2	2	2	2	2	2	2	2	2	2	2	2	2	2	2	2	2	1	6		1	2	2	2	2	2	2	10	2	1	1	1
1439	1	2	1	4	6	4	4	2	2	3	1	4	5	2	1	4	2	2	2	2	2	2	2	2	2	2	2	2	2	2	2	2	2	2	1	6		3	3	2	2	2	2	1		2	1	1	1
614	2	1	1	5	10	4	4	2	2	5	1	3	4	1	3	4	2	2	2	2	2	2	2	2	2	2	2	2	2	2	2	2	2	2	1	6		1	2	2	2	2	2	2	10	2	1	1	2
557	1	1	1	5	7	2	3	1	1	4	1	3	4	1	2	4	2	2	2	2	2	2	2	2	2	2	2	2	2	2	2	2	2	2	1	6		1	2	2	2	2	2	2	10	2	1	1	2
1028	1	1	1	4	4	4	3	2	1	6	2	3	4	1	1	4	2	2	2	2	2	2	2	2	2	2	2	2	2	2	2	2	2	2	1	6		1	2	2	2	3	2	1	11	2	1	1	2
581	1	1	1	5	10	4	3	2	1	5	1	1	1	1	2	4	2	2	2	2	2	2	2	2	2	2	2	2	2	2	2	2	2	2	1	6		1	2	2	2	2	2	2	10	2	1	1	2
866	1	1	1	1	57	4	4	2	2	2	1	1	1	1	1	4	2	2	2	2	2	2	2	2	2	2	2	2	2	2	2	2	2	2	1	6		1	2	2	2	2	2	2	10	2	1	1	2
1393	1	2	1	4	7	4	4	2	2	3	1	1	1	2	1	4	2	2	2	2	2	2	2	2	2	2	2	2	2	2	2	2	2	2	1	6		1	2	2	2	2	2	2	10	2	1	1	2
792	1	1	1	4	6	4	4	2	2	5	1	1	1	1	1	4	2	2	2	2	2	2	2	2	2	2	2	2	2	2	2	2	2	2	1	6		1	2	2	2	2	2	2	10	2	1	1	2
570	1	1	1	5	10	4	4	2	2	6	2	1	1	1	2	4	2	2	2	2	2	2	2	2	2	2	2	2	2	2	2	2	2	2	1	6		1	2	2	2	2	2	2	10	2	1	1	2
272	1	1	1	4	4	4	4	2	2	7	2	1	1	1	1	4	2	2	2	2	2	2	2	2	2	2	2	2	2	2	2	2	2	2	1	6		1	2	2	2	2	2	2	10	2	1	1	2
935	2	1	1	5	10	3	4	1	2	6	2	2	2	2	1	4	2	2	2	2	2	2	2	2	2	2	2	2	2	2	2	2	2	2	1	6		1	2	2	2	2	2	2	10	2	1	1	2
1114	1	2	1	3	9	3	4	1	2	2	1	2	2	1	1	4	2	2	2	2	2	2	2	2	2	2	2	2	2	2	2	2	2	2	1	6		1	2	2	2	2	2	2	10	2	1	1	2
505	2	3	1	5	10	1	2	1	1	11	3	3	4	2	1	4	2	1	2	2	2	2	2	2	2	2	2	2	2	2	2	2	2	1	1	6		1	2	2	2	2	2	2	10	2	1	1	2
900	1	1	1	3	21	4	3	2	1	10	3	3	4	1	1	4	2	2	2	2	2	2	2	2	2	2	2	2	2	2	2	2	2	2	1	6		1	2	2	2	2	2	2	10	2	1	1	2
1447	1	2	1	2	29	4	3	2	1	4	1	3	4	1	1	4	2	2	2	2	2	2	2	2	2	2	2	2	2	2	2	2	2	2	1	6		1	2	2	2	2	2	2	10	2	1	1	2
307	1	3	1	1	1	3	4	1	2	9	3	3	4	1	3	4	2	2	2	2	2	2	2	2	2	2	2	2	2	2	2	2	2	2	1	6		1	2	2	2	2	2	2	10	2	1	1	2
615	2	1	1	5	10	4	4	2	2	3	1	3	4	2	2	4	2	2	2	2	2	2	2	2	2	2	2	2	2	2	2	2	2	2	1	6		1	2	2	2	2	2	2	10	2	1	1	2
169	1	1	1	1	43	4	4	2	2	4	1	3	4	1	2	4	2	2	2	2	2	2	2	2	2	2	2	2	2	2	2	2	2	2	1	6		1	2	2	2	2	2	2	10	2	1	1	2
1451	1	2	1	5	10	4	4	2	2	5	1	3	4	2	3	4	2	2	2	2	2	2	2	2	2	2	2	2	2	2	2	2	2	2	1	6		1	2	2	2	2	2	2	10	2	1	1	2
1245	1	2	1	4	7	3	4	1	2	2	1	3	4	1	1	4	2	2	2	2	2	2	2	2	2	2	2	2	2	2	2	2	2	2	1	6		1	2	2	2	2	2	2	10	2	1	1	2
1468	1	2	1	1	1	4	4	2	2	5	1	3	4	2	1	4	2	2	2	2	2	2	2	2	2	2	2	2	2	2	2	2	2	2	1	6		1	2	2	2	2	2	2	10	2	1	1	2
889	1	1	1	4	7	4	3	2	1	2	1	4	5	2	1	4	2	2	2	2	2	2	2	2	2	2	2	2	2	2	2	2	2	2	1	6		1	2	2	2	2	2	2	10	2	1	1	2
303	1	1	1	1	36	4	3	2	1	5	1	4	5	2	1	4	2	2	2	2	2	2	2	2	2	2	2	2	2	2	2	2	2	2	1	6		1	2	2	2	2	2	2	10	2	1	1	2
386	1	1	1	5	10	3	3	1	1	5	1	4	4	1	2	4	2	2	2	2	2	2	2	2	2	2	2	2	2	2	2	2	2	2	1	6		1	2	2	2	2	2	2	10	2	1	1	2
1268	1	2	1	5	10	4	4	2	2	2	1	4	5	2	1	4	2	2	2	2	2	2	2	2	2	2	2	2	2	2	2	2	2	2	1	6		1	2	2	2	2	2	2	10	2	1	1	2
1327	1	2	1	5	10	4	4	2	2	2	1	4	5	2	1	4	2	2	2	2	2	2	2	2	2	2	2	2	2	2	2	2	2	2	1	6		1	2	2	2	2	2	2	10	2	1	1	2
1071	1	1	1	3	2	4	4	2	2	7	2	4	5	2	2	4	2	2	2	2	2	2	2	2	2	2	2	2	2	2	2	2	2	2	1	6		1	2	2	2	2	2	2	10	2	1	1	2
77	1	1	1	5	10	4	3	2	1	4	1	4	5	1	2	4	2	1	2	2	2	2	2	2	2	2	2	2	2	2	2	2	2	1	1	6		2	1	2	2	2	2	1	9	2	1	1	2
451	1	1	1	5	10	3	3	1	1	2	1	3	4	2	1	4	2	2	2	2	2	2	2	2	2	2	2	2	2	2	2	2	2	2	1	6		1	2	1	2	2	2	1	9	2	1	1	2
1526	1	2	1	1	1	4	4	2	2	3	1	3	4	2	1	4	2	2	2	2	2	2	2	2	2	2	2	2	2	2	2	2	2	2	1	6		3	3	2	2	2	2	1		2	1	1	2
476	2	1	1	5	10	4	4	2	2	3	1	3	4	1	1	4	2	2	2	2	2	2	2	2	2	2	2	2	2	2	2	2	2	2	1	6		3	3	2	2	2	2	1		2	1	1	2
354	1	1	1	5	10	4	4	2	2	5	1	4	5	1	1	4	2	2	2	2	2	2	2	2	2	2	2	2	2	2	2	2	2	2	1	6		1	2	2	2	2	2	2	10	2	1	1	2
313	1	1	1	4	4	4	4	2	2	8	2	4	5	1	3	4	2	2	2	2	2	2	2	2	2	2	2	2	2	2	2	2	2	2	1	6	3	1	2	2	2	2	2	2	10	2	1	1	2
821	1	1	1	3	2	4	4	2	2	4	1	1	1	1	1	4	2	2	2	2	2	2	2	2	2	2	2	2	2	2	2	2	2	2	1	6		1	2	2	2	2	2	2	10	2	1	2	1
934	2	1	1	5	10	3	3	1	1	7	2	3	4	1	2	4	2	2	2	2	2	2	2	2	2	2	2	2	2	2	2	2	2	2	1	6		1	2	2	2	2	2	2	10	2	1	2	1
1141	1	2	1	4	7	4	4	2	2	4	1	3	4	1	1	4	2	2	2	2	2	2	2	2	2	2	2	2	2	2	2	2	2	2	1	6		1	2	2	2	2	2	2	10	2	1	2	1
1390	1	2	1	4	7	4	4	2	2	6	2	4	5	2	1	4	2	2	2	2	2	2	2	2	2	2	2	2	2	2	2	2	2	2	1	6		1	2	2	2	2	2	2	10	2	1	2	1
836	2	3	1	4	4	2	2	1	1	3	1	3	4	2	1	4	2	1	2	2	2	2	2	2	2	2	2	2	2	2	2	2	2	1	1	6	7	1	2	2	2	2	2	2	10	2	1	2	2
743	1	1	1	5		2	2	1	1	8	2	3	4	2	1	4	2	2	2	2	2	2	2	2	2	2	2	2	2	2	2	2	2	2	1	6		1	2	2	2	2	2	2	10	2	1	2	2
301	1	1	1	1	52	3	4	1	2	4	1	3	4	1	3	4	2	2	2	2	2	2	2	2	2	2	2	2	2	2	2	2	2	2	1	6		3	3	2	2	2	2	1		2	1	2	2
457	1	1	1	1	11	4	3	2	1	3	1	1	1	2	1	4	2	2	2	2	2	2	2	2	2	2	2	2	2	2	2	2	2	2	1	6		1	2	2	2	2	2	2	10	2	1	2	2
673	1	1	1	4	7	4	4	2	2	2	1	1	1	2	1	4	2	2	2	2	2	2	2	2	2	2	2	2	2	2	2	2	2	2	1	6		1	2	2	2	2	2	2	10	2	1	2	2
310	1	1	1	1	1	4	4	2	2	3	1	1	1	2	3	4	2	2	2	2	2	2	2	2	2	2	2	2	2	2	2	2	2	2	1	6		1	2	2	2	2	2	2	10	2	1	2	2
513	1	1	1	5	10	4	4	2	2	4	1	1	1	2	2	4	2	2	2	2	2	2	2	2	2	2	2	2	2	2	2	2	2	2	1	6		1	2	2	2	2	2	2	10	2	1	2	2
1069	1	1	1	2	10	4	4	2	2	4	1	1	1	2	3	4	2	2	2	2	2	2	2	2	2	2	2	2	2	2	2	2	2	2	1	6		1	2	2	2	2	2	2	10	2	1	2	2
346	1	1	1	5	10	4	4	2	2	7	2	1	1	1	2	4	2	2	2	2	2	2	2	2	2	2	2	2	2	2	2	2	2	2	1	6		1	2	2	2	2	2	2	10	2	1	2	2
353	1	1	1	4	4	4	4	2	2	8	2	1	1	2	2	4	2	2	2	2	2	2	2	2	2	2	2	2	2	2	2	2	2	2	1	6		1	2	2	2	2	2	2	10	2	1	2	2
767	1	1	1	4		4	4	2	2	3	1	1	1	1	1	4	2	2	2	2	2	2	2	2	2	2	2	2	2	2	2	2	2	2	1	6		1	2	2	2	2	2	2	10	2	1	2	2
1145	1	2	1	3	5	4	4	2	2	9	3	1	1	1	2	4	2	2	2	2	2	2	2	2	2	2	2	2	2	2	2	2	2	2	1	6		1	2	2	2	2	2	2	10	2	1	2	2
358	1	1	1	1	46	4	3	2	1	3	1	2	3	2	1	4	2	2	2	2	2	2	2	2	2	2	2	2	2	2	2	2	2	2	1	6		1	2	2	2	2	2	2	10	2	1	2	2
945	1	1	1	5	10	4	3	2	1	10	3	2	3	1	1	4	2	2	2	2	2	2	2	2	2	2	2	2	2	2	2	2	2	2	1	6		1	2	2	2	2	2	2	10	2	1	2	2
741	1	1	1	5		4	4	2	2	4	1	2	2	2	1	4	2	2	2	2	2	2	2	2	2	2	2	2	2	2	2	2	2	2	1	6		1	2	2	2	2	2	2	10	2	1	2	2
832	1	1	1	4	6	3	4	1	2	3	1	2	2	2	1	4	2	2	2	2	2	2	2	2	2	2	2	2	2	2	2	2	2	2	1	6		1	2	2	2	2	2	2	10	2	1	2	2
361	1	1	1	4	11	4	4	2	2	7	2	2	3	2	2	4	2	2	2	2	2	2	2	2	2	2	2	2	2	2	2	2	2	2	1	6		1	2	2	2	2	2	2	10	2	1	2	2
235	1	1	1	4	4	3	3	1	1	7	2	3	4	1	1	4	2	2	2	2	2	2	2	2	2	2	2	2	2	2	2	2	2	2	1	6		1	2	2	2	2	2	2	10	2	1	2	2
385	1	1	1	4	11	4	3	2	1	2	1	3	4	2	2	4	2	2	2	2	2	2	2	2	2	2	2	2	2	2	2	2	2	2	1	6		1	2	2	2	2	2	2	10	2	1	2	2
580	1	1	1	5	10	4	4	2	2	5	1	3	4	1	1	4	2	1	2	2	2	2	2	2	2	1	2	2	2	2	2	2	2	2	1	6		1	2	2	2	2	2	2	10	2	1	2	2
315	1	1	1	5	7	3	4	1	2	11	3	3	4	1	1	4	2	2	2	2	2	2	2	2	2	2	2	2	2	2	2	2	2	2	1	6		1	2	2	2	2	2	2	10	2	1	2	2
1146	1	2	1	5	10	4	4	2	2	11	3	3	4	1	2	4	2	2	2	2	2	2	2	2	2	2	2	2	2	2	2	2	2	2	1	6		1	2	2	2	2	2	2	10	2	1	2	2
474	2	1	1	5	64	4	4	2	2	8	2	3	4	2	2	4	2	2	2	2	2	2	2	2	2	2	2	2	2	2	2	2	2	2	1	6		1	2	2	2	2	2	2	10	2	1	2	2
160	1	1	1	1	52	3	4	1	2	3	1	3	4	1	1	4	2	2	2	2	2	2	2	2	2	2	2	2	2	2	2	2	2	2	1	6		1	2	2	2	2	2	2	10	2	1	2	2
70	1	1	1	3	19	4	4	2	2	4	1	3	4	2	1	4	2	1	2	2	2	2	2	2	2	2	2	2	2	2	2	2	2	1	1	6		1	2	2	2	2	2	2	10	2	1	2	2
1259	1	2	1	5	24	4	4	2	2	9	3	3	4	1	3	4	2	2	2	2	2	2	2	2	2	2	2	2	2	2	2	2	2	2	1	6		1	2	2	2	2	2	2	10	2	1	2	2
1054	1	1	1	3	2	4	4	2	2	10	3	3	4	2	1	4	2	2	2	2	2	2	2	2	2	2	2	2	2	2	2	2	2	2	1	6		1	2	2	2	2	2	2	10	2	1	2	2
287	2	1	1	5	10	4	4	2	2	2	1	4	5	2	5	4	2	2	2	2	2	2	2	2	2	2	2	2	2	2	2	2	2	2	1	6		1	2	2	2	2	2	2	10	2	1	2	2
625	1	3	1	4	6	4	4	2	2	2	1	4	5	1	2	4	2	2	2	2	2	2	2	2	2	2	2	2	2	2	2	2	2	2	1	6		1	2	2	2	2	2	2	10	2	1	2	2
425	1	1	1	1	1	4	4	2	2	3	1	4	5	1	1	4	2	2	2	2	2	2	2	2	2	2	2	2	2	2	2	2	2	2	1	6		1	2	2	2	2	2	2	10	2	1	2	2
180	1	1	1	1	7	4	4	2	2	5	1	4	5	1	1	4	2	2	2	2	2	2	2	2	2	2	2	2	2	2	2	2	2	2	1	6		1	2	2	2	2	2	2	10	2	1	2	2
427	2	1	1	1	8	1	1	1	1	2	1	4	5	1	1	4	2	2	2	2	2	2	2	2	2	2	2	2	2	2	2	2	2	2	1	6		2	1	2	2	2	2	1	9	2	1	2	2
61	1	1	1	5	10	4	3	2	1	4	1	4	5	1	2	4	2	1	2	2	2	2	2	2	2	2	2	2	2	2	2	2	2	1	1	6		2	1	2	2	2	2	1	9	2	1	2	2
786	1	1	1	4		4	4	2	2	8	2	1	1	1	1	4	2	2	2	2	2	2	2	2	2	2	2	2	2	2	2	2	2	2	1	6		3	3	2	2	2	2	1		2	1	2	2
214	1	3	1	1	1	3	3	1	1	4	1	4	5	2	1	4	2	2	2	2	2	2	2	2	2	2	2	2	2	2	2	2	2	2	1	6		3	3	2	2	2	2	1		2	1	2	2
630	2	1	1	1	31	4	4	2	2	2	1	4	5	1	2	4	2	2	2	2	2	2	2	2	2	2	2	2	2	2	2	2	2	2	1	6		3	3	2	2	2	2	1		2	1	2	2
466	1	1	1	5	10	4	4	2	2	3	1	1	1	2	1	4	2	2	2	2	2	2	2	2	2	2	2	2	2	2	2	2	2	2	1	6		1	2	2	2	2	2	2	10	2	1	2	2
1050	1	1	1	5	10	4	4	2	2	3	1	4	5	2	1	4	2	2	2	2	2	2	2	2	2	2	2	2	2	2	2	2	2	2	1	6		1	2	2	2	2	2	2	10	2	1	2	2
1143	1	2	1	1	52	4	4	2	2	2	1	2	2	1	1	4	2	2	2	2	2	2	2	2	2	2	2	2	2	2	2	2	2	2	1	6		3	3	3	2	2	2	1		2	1	2	2
1239	1	2	1	3	9	4	4	2	2	5	1	1	1	1	1	4	2	2	2	2	2	2	2	2	2	2	2	2	2	2	2	2	2	2	1	6		1	2	2	2	2	2	2	10	2	1	2	2
1158	1	2	1	1	52	4	4	2	2	5	1	1	1	1	1	4	2	2	2	2	2	2	2	2	2	2	2	2	2	2	2	2	2	2	1	6		1	2	2	2	2	2	2	10	2	1	2	2
1453	1	2	1	5	10	4	4	2	2	3	1	2	2	2	1	4	2	2	2	2	2	2	2	2	2	2	2	2	2	2	2	2	2	2	1	6		1	2	2	2	2	2	2	10	2	1	2	2
1331	1	2	1	5	10	4	4	2	2	3	1	2	2	2	1	4	2	2	2	2	2	2	2	2	2	2	2	2	2	2	2	2	2	2	1	6		1	2	2	2	2	2	2	10	2	1	2	2
234	1	1	1	4	4	4	4	2	2	6	2	2	2	2	1	4	2	2	2	2	2	2	2	2	2	2	2	2	2	2	2	2	2	2	1	6		1	2	2	2	2	2	2	10	1	1	1	1
393	1	1	1	5	10	4	4	2	2	5	1	1	1	2	2	4	2	2	2	2	2	2	2	2	2	2	2	2	2	2	2	2	2	2	1	6		1	2	2	2	2	2	2	10	1	1	1	1
902	1	1	1	1	1	4	4	2	2	9	3	2	3	1	2	4	2	2	2	2	2	2	2	2	2	2	2	2	2	2	2	2	2	2	1	6		1	2	2	2	2	2	2	10	1	1	1	1
243	1	1	1	4	4	4	4	2	2	6	2	2	2	2	1	4	2	2	2	2	2	2	2	2	2	2	2	2	2	2	2	2	2	2	1	6		1	2	2	2	2	2	2	10	1	1	1	2
1504	1	2	1	1	63	3	3	1	1	9	3	1	1	2	1	4	2	1	2	2	2	2	2	2	2	2	2	2	2	2	2	2	2	1	1	6	7	1	2	2	2	2	2	2	10	1	1	1	2
399	1	1	1	5	10	4	4	2	2	3	1	1	1	1	1	4	2	2	2	2	2	2	2	2	2	2	2	2	2	2	2	2	2	2	1	6		1	2	2	2	2	2	2	10	1	1	1	2
396	1	1	1	3	10	4	4	2	2	5	1	1	1	1	1	4	2	2	2	2	2	2	2	2	2	2	2	2	2	2	2	2	2	2	1	6		1	2	2	2	2	2	2	10	1	1	1	2
52	1	1	1	4	4	4	4	2	2	6	2	1	1	1	1	4	2	1	2	2	2	2	2	2	2	2	2	2	2	2	2	2	2	1	1	6		1	2	2	2	2	2	2	10	1	1	1	2
1161	1	2	1	1	1	4	4	2	2	9	3	2	3	1	1	4	2	2	2	2	2	2	2	2	2	2	2	2	2	2	2	2	2	2	1	6		1	2	2	2	2	2	2	10	1	1	1	2
1474	1	2	1	1	1	4	2	2	1	3	1	3	4	2	1	4	2	2	2	2	2	2	2	2	2	2	2	2	2	2	2	2	2	2	1	6		1	2	2	2	2	2	2	10	1	1	1	2
882	1	1	1	4	7	4	3	2	1	2	1	3	4	1	1	4	2	2	2	2	2	2	2	2	2	2	2	2	2	2	2	2	2	2	1	6		1	2	2	2	2	2	2	10	1	1	1	2
110	1	1	1	4	4	4	4	2	2	9	3	3	4	1	1	4	2	1	2	2	1	2	2	2	2	2	2	2	2	2	2	2	2	2	1	6		1	2	2	2	2	2	2	10	1	1	1	2
929	2	1	1	4	4	4	4	2	2	11	3	3	4	1	2	4	2	2	2	2	2	2	2	2	2	2	2	2	2	2	2	2	2	2	1	6		1	2	2	2	2	2	2	10	1	1	1	2
1020	1	1	1	2	62	4	4	2	2	5	1	3	4	2	1	4	2	2	2	2	2	2	2	2	2	2	2	2	2	2	2	2	2	2	1	6		1	2	2	2	2	2	2	10	1	1	1	2
13	1	1	1	4	4	4	4	2	2	2	1	3	4	1	1	4	2	1	2	2	2	2	2	2	2	2	2	2	2	2	2	2	2	1	1	6		1	2	2	2	2	2	2	10	1	1	1	2
406	1	1	1	3	19	4	4	2	2	3	1	4	5	2	1	4	2	2	2	2	2	2	2	2	2	2	2	2	2	2	2	2	2	2	1	6		1	2	2	2	2	2	2	10	1	1	1	2
477	1	1	1	5	30	4	4	2	2	3	1	4	5	2	1	4	2	2	2	2	2	2	2	2	2	2	2	2	2	2	2	2	2	2	1	6		1	2	2	2	2	2	2	10	1	1	1	2
1055	1	1	1	3	2	4	4	2	2	4	1	4	5	2	1	4	2	2	2	2	2	2	2	2	2	2	2	2	2	2	2	2	2	2	1	6		1	2	2	2	2	2	2	10	1	1	1	2
1104	1	1	1	3	26	4	4	2	2	5	1	4	5	1	1	4	2	1	2	1	2	2	2	2	2	2	2	2	2	2	2	2	2	2	1	6		1	2	2	2	2	2	2	10	1	1	1	2
38	1	1	1	4	7	3	4	1	2	9	3	3	4	1	1	4	2	1	2	2	2	2	2	2	2	2	2	2	2	2	2	2	2	1	1	6		1	2	1	2	2	2	1	9	1	1	1	2
748	2	1	1	4		4	4	2	2	3	1	3	4	2	1	4	2	2	2	2	2	2	2	2	2	2	2	2	2	2	2	2	2	2	1	6		3	3	2	2	2	2	1		1	1	1	2
545	2	3	1	5	10	1	2	1	1	2	1	1	1	1	1	4	2	2	2	2	2	2	2	2	2	2	2	2	2	2	2	2	2	2	1	6		1	2	2	2	2	2	2	10	1	1	1	2
978	2	1	1	1	27	1	2	1	1	11	3	3	4	2	1	4	2	2	2	2	2	2	2	2	2	2	2	2	2	2	2	2	2	2	1	6		1	2	2	2	2	2	2	10	1	1	2	1
777	1	1	1	4		3	3	1	1	4	1	1	1	1	1	4	2	2	2	2	2	2	2	2	2	2	2	2	2	2	2	2	2	2	1	6		1	2	2	2	2	2	2	10	1	1	2	2
403	1	1	1	5	10	4	3	2	1	6	2	1	1	1	2	4	2	2	2	2	2	2	2	2	2	2	2	2	2	2	2	2	2	2	1	6		1	2	2	2	2	2	2	10	1	1	2	2
1278	1	2	1	5	10	3	3	1	1	4	1	1	1	1	1	4	2	2	2	2	2	2	2	2	2	2	2	2	2	2	2	2	2	2	1	6		1	2	2	2	2	2	2	10	1	1	2	2
400	1	1	1	5	10	4	4	2	2	3	1	1	1	2	1	4	2	2	2	2	2	2	2	2	2	2	2	2	2	2	2	2	2	2	1	6		1	2	2	2	2	2	2	10	1	1	2	2
198	1	1	1	1	69	3	4	1	2	6	2	1	1	2	1	4	2	2	2	2	2	2	2	2	2	2	2	2	2	2	2	2	2	2	1	6		1	2	2	2	2	2	2	10	1	1	2	2
73	1	1	1	4	4	4	4	2	2	6	2	2	2	1	1	4	2	1	2	2	2	2	2	2	2	2	2	2	2	2	2	2	2	1	1	6		1	2	2	2	2	2	2	10	1	1	2	2
915	1	1	1	5	10	3	3	1	1	10	3	3	4	1	2	4	2	2	2	2	2	2	2	2	2	2	2	2	2	2	2	2	2	2	1	6		1	2	2	2	2	2	2	10	1	1	2	2
504	1	1	1	5	10	3	3	1	1	2	1	3	4	2	1	4	2	2	2	2	2	2	2	2	2	2	2	2	2	2	2	2	2	2	1	6		1	2	2	2	2	2	2	10	1	1	2	2
937	1	1	1	5	10	3	4	1	2	5	1	3	4	1	1	4	2	2	2	2	2	2	2	2	2	2	2	2	2	2	2	2	2	2	1	6		1	2	2	2	2	2	2	10	1	1	2	2
25	1	1	1	4	12	4	4	2	2	5	1	4	5	2	1	4	2	1	2	2	2	2	2	2	2	2	2	2	2	2	2	2	2	1	1	6		1	2	2	2	2	2	2	10	1	1	2	2
560	1	1	1	1	48	4	4	2	2	7	2	4	5	2	1	4	2	2	2	2	2	2	2	2	2	2	2	2	2	2	2	2	2	2	1	6		1	2	2	2	2	2	2	10	1	1	2	2
903	1	1	1	4	4	4	4	2	2	7	2	1	1	1	1	4	2	2	2	2	2	2	2	2	2	2	2	2	2	2	2	2	2	2	1	6		2	1	2	2	2	2	1	9	1	1	2	2
37	1	1	1	4	4	4	4	2	2	3	1	1	5	2	2	4	2	1	2	2	2	2	2	2	2	2	2	2	2	2	2	2	2	1	1	6		1	2	2	3	2	2	1	11	1	1	2	2
1340	1	2	1	3	56	4	4	2	2	7	2	2	2	2	3	4	2	2	2	2	2	2	2	2	2	2	2	2	2	2	2	2	2	2	1	6		3	3	2	2	2	2	1		1	1	2	2
512	2	1	1	5	10	4	4	2	2	7	2	3	4	2	1	4	2	2	2	2	2	2	2	2	2	2	2	2	2	2	2	2	2	2	1	6		1	2	2	2	2	2	2	10	1	1	2	2
585	2	1	1	5	10	4	4	2	2	11	3	3	4	1	2	4	2	2	2	2	2	2	2	2	2	2	2	2	2	2	2	2	2	2	1	6		3	3	2	2	2	2	1		1	1	2	2
1532	1	2	1	1	46	4	2	2	1	5	1	3	4	1	1	4	2	2	2	2	2	2	2	2	2	2	2	2	2	2	2	2	2	2	1	6		1	2	2	2	2	2	2	10	1	1	2	2
1308	1	2	1	5	10	4	4	2	2	4	1	3	4	1	1	4	2	2	2	2	2	2	2	2	2	2	2	2	2	2	2	2	2	2	1	6		1	2	2	2	2	2	2	10	1	1	2	2
1157	1	2	1	1	1	4	4	2	2	2	1	4	5	2	1	4	2	2	2	2	2	2	2	2	2	2	2	2	2	2	2	2	2	2	1	6		1	2	2	2	2	2	2	10	1	1	2	2
1348	1	2	1	5	10	4	4	2	2	4	1	4	5	2	1	4	2	2	2	2	2	2	2	2	2	2	2	2	2	2	2	2	2	2	1	6		1	2	1	2	2	2	1	9	1	1	2	2
723	1	1	1	3		4	4	2	2	4	1	3	4	2	2	3	1	1	2	2	1	2	2	2	2	2	2	2	2	2	2	2	2	2	1	6		3	3	2	2	3	3	1		6	2	1	2
916	1	1	1	3	14	4	2	2	1	6	2	4	5	1	2	3	1	1	2	1	1	2	2	2	2	2	2	2	2	2	2	2	2	2	1	6		1	2	2	2	2	2	2	10	6	2	2	2
706	1	1	1	2	7	3	1	1	1	9	3	1	1	2	3	3	1	1	2	1	1	2	2	2	2	2	2	2	2	2	2	2	2	2	1	6		1	2	2	2	2	2	2	10	6	2	2	2
22	1	1	1	4	4	4	4	2	2	4	1	1	1	1	5	3	1	2	2	2	2	2	2	2	2	2	2	2	2	2	2	2	2	2	1	6		1	2	2	2	2	2	2	10	6	2	2	2
771	2	1	1	4		2	4	1	2	11	3	3	4	1	4	3	1	1	2	1	2	2	2	2	2	2	2	2	2	2	2	2	2	2	1	6		1	2	1	3	2	2	1	10	6	2	2	2
587	1	1	1	3	10	2	4	1	2	3	1	3	4	1	3	3	1	1	2	2	2	2	2	2	2	2	2	1	2	2	2	2	2	2	1	6		1	2	2	2	1	1	1	8	6	2	2	2
665	1	1	1	5	10	4	3	2	1	5	1	1	1	2	2	3	1	1	2	2	1	2	2	2	2	2	2	2	2	2	2	2	2	2	1	6		1	2	2	2	2	2	2	10	5	1	1	2
746	2	1	1	5		2	1	1	1	7	2	3	4	2	2	3	1	1	2	2	2	2	2	2	2	1	2	2	2	2	2	2	2	2	1	6		1	2	2	2	2	2	2	10	5	1	1	2
936	1	1	1	2	10	4	3	2	1	3	1	3	4	1	3	3	1	1	1	2	2	2	2	2	2	2	2	2	2	2	2	2	2	2	1	6	5	2	1	3	3	3	2	1	12	5	1	1	2
989	1	1	1	5	10	2	2	1	1	9	3	2	3	2	2	3	1	1	2	2	1	2	2	2	2	2	2	2	2	2	2	2	2	2	1	6		2	1	3	3	2	2	1	11	5	1	2	2
215	1	1	1	1	1	3	4	1	2	9	3	3	4	1	3	3	1	1	2	2	1	2	2	2	2	2	2	2	2	2	2	2	2	2	1	6		3	3	2	2	2	3	1		5	1	2	2
1493	1	2	1	1	7	4	3	2	1	3	1	3	4	1	4	3	1	1	2	1	2	2	2	2	2	2	2	2	2	2	2	2	2	2	1	6	1	2	1	2	2	1	2	1	8	5	1	2	2
219	1	1	1	1	1	3	4	1	2	9	3	3	4	1	3	3	1	1	2	2	1	2	2	2	2	2	2	2	2	2	2	2	2	2	1	6		3	3	2	2	2	3	1		5	1	2	2
640	2	1	1	5	40	3	4	1	2	11	3	3	4	2	3	3	1	1	2	1	2	2	2	2	2	2	2	2	2	2	2	2	2	2	1	6		1	2	2	2	2	2	2	10	4	1	1	2
528	1	1	1	5	10	4	2	2	1	11	3	3	4	1	4	3	1	1	2	1	1	2	2	2	2	2	2	2	2	2	2	2	2	2	1	6		2	1	1	3	2	2	1	9	4	1	1	2
434	1	1	1	4	11	4	4	2	2	7	2	1	1	1	4	3	1	1	1	2	1	1	1	2	2	2	2	2	2	2	1	2	2	2	1	6		2	1	2	1	1	1	1	6	4	1	1	2
930	1	1	1	1	48	4	3	2	1	2	1	2	3	1	2	3	1	1	2	2	2	1	2	2	2	2	2	2	2	2	2	2	2	2	1	6		3	3	3	2	2	2	1		4	1	1	2
189	1	1	1	1	36	4	4	2	2	10	3	2	3	1	3	3	1	1	2	2	2	2	2	2	2	2	2	2	2	2	1	2	2	2	1	6		1	2	2	2	2	2	2	10	4	1	2	1
475	1	1	1	5	7	4	4	2	2	8	2	3	4	2	2	3	1	1	2	2	2	2	2	2	2	2	2	2	2	2	2	2	2	1	1	6		1	2	2	2	2	2	2	10	4	1	2	2
679	1	1	1	4	4	3	2	1	1	10	3	3	4	2	3	3	1	1	2	1	2	2	1	2	2	2	2	2	2	2	2	2	2	1	1	6		3	3	2	2	1	2	1		4	1	2	2
1038	2	1	1	1	48	4	4	2	2	9	3	2	3	1	3	3	1	1	2	2	2	2	2	2	2	2	2	2	2	2	1	2	2	2	1	6		3	3	2	2	2	2	1		4	1	2	2
364	1	1	1	3	51	4	3	2	1	2	1	3	4	2	3	3	1	1	2	2	2	2	2	2	2	2	2	2	1	2	2	2	2	2	1	6		3	3	2	3	3	1	1		3	1	1	1
1425	1	2	1	4	12	2	2	1	1	8	2	2	2	2	2	3	1	1	2	2	2	2	2	2	2	2	2	2	2	2	2	2	2	1	1	6	4	1	2	2	2	2	2	2	10	3	1	1	2
672	1	1	1	5	10	2	2	1	1	6	2	3	4	2	2	3	1	1	1	2	2	2	2	2	2	2	2	2	1	2	2	2	2	2	1	6		1	2	2	2	2	2	2	10	3	1	1	2
785	1	1	1	4		2	2	1	1	4	1	3	4	2	2	3	1	1	1	2	2	2	2	2	2	2	2	2	2	2	2	2	2	2	1	6		1	2	2	2	2	2	2	10	3	1	1	2
1260	1	2	1	3	2	4	4	2	2	8	2	2	3	1	3	3	1	2	2	2	2	2	2	2	2	2	2	2	2	2	2	2	2	2	1	6		2	1	2	2	2	2	1	9	3	1	2	2
891	1	1	1	4	11	4	4	2	2	11	3	3	4	1	3	3	1	1	2	2	1	2	2	2	2	2	2	2	2	2	2	2	2	2	1	6		2	1	1	2	2	2	1	8	3	1	2	2
1285	1	2	1	5	10	4	4	2	2	11	3	3	4	2	2	3	1	1	2	2	1	2	2	2	2	2	2	2	2	2	2	2	2	2	1	6		2	1	2	2	2	2	1	9	3	1	2	2
735	1	1	1	4		1	4	1	2	8	2	2	2	2	3	3	1	2	2	2	2	2	2	2	2	2	2	2	2	2	2	2	2	2	1	6		3	3	2	2	3	3	1		3	1	2	2
825	1	3	1	5	30	2	4	1	2	10	3	3	4	2	3	3	1	1	2	1	2	2	2	2	2	1	2	2	1	2	2	2	2	2	1	6		1	2	2	2	2	2	2	10	3	1	2	2
1486	1	2	1	1	15	4	3	2	1	5	1	1	1	1	4	3	1	1	2	1	2	2	2	2	2	2	2	2	2	2	2	2	2	2	1	6		3	3	2	2	2	2	1		3	1	2	2
864	1	1	1	4	4	4	3	2	1	10	3	4	5	1	2	3	1	1	2	2	2	2	2	2	2	1	2	2	2	2	2	2	2	2	1	6		3	3	2	2	2	2	1		2	1	1	1
250	1	1	1	4	4	4	4	2	2	8	2	2	3	1	3	3	1	1	2	1	2	2	2	2	2	2	2	2	2	2	2	2	2	2	1	6		1	2	2	2	2	2	2	10	2	1	1	1
225	1	1	1	4	12	4	4	2	2	5	1	1	1	1	2	3	1	1	2	2	2	1	2	2	2	2	2	2	2	2	2	2	2	2	1	6		1	2	2	2	2	2	2	10	2	1	1	2
131	1	1	1	4	4	4	4	2	2	5	1	2	3	2	2	3	1	1	2	2	2	2	2	2	2	2	2	2	2	2	1	2	2	2	1	6		1	2	2	2	1	1	1	8	2	1	1	2
40	1	1	1	4	12	4	4	2	2	5	1	1	1	1	2	3	1	1	2	2	2	1	2	2	2	2	2	2	2	2	2	2	2	2	1	6		1	2	2	2	2	2	2	10	2	1	1	2
689	2	1	1	3	14	3	2	1	1	4	1	2	2	2	3	3	1	1	2	2	2	2	2	2	2	2	2	2	2	2	2	2	2	1	1	6		1	2	2	2	2	2	2	10	2	1	1	2
145	1	1	1	1	36	4	3	2	1	5	1	2	2	2	2	3	1	1	2	2	2	2	2	2	2	2	2	2	2	2	2	1	2	2	1	6		1	2	2	2	2	2	2	10	2	1	1	2
251	1	1	1	4	4	4	4	2	2	8	2	2	3	1	3	3	1	1	2	1	2	2	2	2	2	2	2	2	2	2	2	2	2	2	1	6		1	2	2	2	2	2	2	10	2	1	1	2
896	1	1	1	5	16	4	4	2	2	5	1	3	4	1	1	3	1	1	2	2	1	2	2	2	2	2	2	2	2	2	2	2	2	2	1	6		1	2	2	2	2	2	2	10	2	1	1	2
203	2	3	2	1	1	1	4	1	2	11	3	3	4	2	3	3	1	1	2	1	2	2	2	2	2	1	2	2	2	2	2	2	2	2	1	6	7	1	2	2	2	2	2	2	10	2	1	1	2
171	1	1	1	1	54	3	4	1	2	9	3	3	4	1	3	3	1	2	2	2	2	2	2	2	2	2	2	2	2	2	2	2	2	2	1	6	1	1	2	2	2	2	2	2	10	2	1	1	2
758	1	1	1	4		2	4	1	2	4	1	3	4	1	1	3	1	1	2	1	2	2	2	2	2	2	2	2	2	2	1	2	2	1	1	6		3	3	2	2	2	2	1		2	1	1	2
211	1	1	1	1	36	4	3	2	1	5	1	2	2	2	2	3	1	1	2	2	2	2	2	2	2	2	2	2	2	2	2	1	2	2	1	6		1	2	2	2	2	2	2	10	2	1	2	2
223	1	1	1	1	36	4	3	2	1	5	1	2	2	2	2	3	1	1	2	2	2	2	2	2	2	2	2	2	2	2	2	1	2	2	1	6		1	2	2	2	2	2	2	10	2	1	2	2
293	1	1	1	1	8	4	4	2	2	4	1	4	5	2	1	3	1	1	2	1	2	2	2	2	2	2	2	2	2	2	2	2	2	2	1	6		1	2	2	2	2	2	2	10	2	1	2	2
1502	1	2	1	1	1	4	4	2	2	2	1	2	3	2	1	3	1	1	2	2	2	1	2	2	2	2	2	2	2	2	2	2	2	2	1	6		1	2	2	2	2	2	2	10	2	1	2	2
35	1	1	1	4	4	4	4	2	2	8	2	1	1	2	2	3	1	1	2	2	2	2	2	2	2	2	2	2	2	2	2	2	2	1	1	6		2	1	2	2	2	2	1	9	2	1	2	2
1519	1	2	1	4	70	4	3	2	1	9	3	3	4	2	3	3	1	1	1	1	2	2	2	2	2	2	2	2	2	2	2	2	2	2	1	6		2	1	2	2	2	2	1	9	2	1	2	2
993	1	1	1	2	46	4	4	2	2	8	2	1	1	2	2	3	1	1	2	2	1	2	2	2	2	2	2	2	2	2	2	2	2	2	1	6		2	1	2	2	3	3	1	11	2	1	2	2
308	1	1	1	1	1	4	4	2	2	7	2	3	4	2	3	3	1	1	2	2	1	2	2	2	2	2	2	2	2	2	2	2	2	2	1	6		1	2	3	2	3	3	1	13	2	1	2	2
1505	1	2	1	3	4	4	4	2	2	7	2	3	4	2	4	3	1	1	2	1	1	2	2	2	2	2	2	2	2	2	2	2	2	2	1	6		3	3	3	3	3	3	1		2	1	2	2
754	1	1	1	5		4	4	2	2	11	3	3	4	1	3	3	1	1	2	1	1	2	2	1	2	2	2	2	1	2	2	2	2	2	1	6	2	3	3	2	2	2	1	1		2	1	2	2
81	1	1	1	4	6	4	4	2	2	10	3	1	1	2	2	3	1	2	2	2	2	2	2	2	2	2	2	2	2	2	2	2	2	2	1	6		1	2	2	2	2	2	2	10	1	1	1	2
75	1	1	1	4	6	4	4	2	2	10	3	1	1	2	2	3	1	2	2	2	2	2	2	2	2	2	2	2	2	2	2	2	2	2	1	6		1	2	2	2	2	2	2	10	1	1	1	2
90	1	1	1	4	4	4	4	2	2	3	1	1	1	1	1	3	1	1	2	2	2	2	2	2	2	1	2	2	2	2	2	2	2	2	1	6		1	2	2	2	2	2	2	10	1	1	2	2
886	1	1	1	2	62	4	3	2	1	4	1	1	1	2	1	3	1	1	2	2	2	2	2	2	2	2	2	2	2	1	2	2	2	2	1	6		1	2	2	2	2	2	2	10	1	1	2	2
628	1	1	1	5	10	4	4	2	2	7	2	1	1	2	3	3	1	1	2	2	2	2	2	2	2	2	2	2	2	2	2	2	2	1	1	6	2	1	2	2	2	2	2	2	10	1	1	2	2
96	1	1	1	4	4	4	4	2	2	3	1	1	1	1	1	3	1	1	2	2	2	2	2	2	2	1	2	2	2	2	2	2	2	2	1	6		1	2	2	2	2	2	2	10	1	1	2	2
1144	1	2	1	3	2	3	4	1	2	5	1	3	4	2	2	3	1	1	2	2	2	2	2	2	2	2	2	2	2	2	2	2	2	1	1	6		1	2	2	2	2	2	2	10	1	1	2	2
1284	1	2	1	4	4	3	3	1	1	9	3	3	4	2	3	3	1	1	1	2	2	2	2	2	2	2	2	2	2	2	2	2	2	2	1	6		3	3	2	3	2	2	1		1	1	2	2
719	1	1	1	4		4	4	2	2	6	2	4	5	1	3	3	2	2	2	2	2	2	2	2	2	2	2	2	2	2	2	2	2	2	1	6		1	2	2	2	2	2	2	10	6	2	1	2
41	1	1	1	4	12	4	4	2	2	3	1	3	4	1	3	3	2	2	2	2	2	2	2	2	2	2	2	2	2	2	2	2	2	2	1	6		2	1	2	2	2	2	1	9	6	2	1	2
99	1	1	1	4	12	4	4	2	2	3	1	3	4	1	3	3	2	2	2	2	2	2	2	2	2	2	2	2	2	2	2	2	2	2	1	6		2	1	2	2	2	2	1	9	6	2	1	2
666	1	1	1	3	51	4	4	2	2	4	1	1	1	2	2	3	2	2	2	2	2	2	2	2	2	2	2	2	2	2	2	2	2	2	1	6		1	2	2	2	2	3	1	11	6	2	1	2
150	1	1	1	1	33	4	4	2	2	5	1	2	3	1	3	3	2	1	2	2	1	2	2	2	2	2	2	2	2	2	2	2	2	2	1	6		3	3	2	2	2	2	1		6	2	1	2
191	1	1	1	1	33	4	4	2	2	5	1	2	3	1	3	3	2	1	2	2	1	2	2	2	2	2	2	2	2	2	2	2	2	2	1	6		3	3	2	2	2	2	1		6	2	1	2
217	2	1	1	1	33	4	4	2	2	11	3	3	4	1	3	3	2	1	2	2	2	2	2	2	2	1	2	2	2	2	2	2	2	2	1	6		3	3	2	2	2	2	1		6	2	1	2
1127	1	2	1	3	5	4	4	2	2	2	1	4	5	1	1	3	2	2	2	2	2	2	2	2	2	2	2	2	2	2	2	2	2	2	1	6		3	3	2	2	2	2	1		6	2	1	2
220	2	1	1	1	33	4	4	2	2	11	3	3	4	1	3	3	2	1	2	2	2	2	2	2	2	1	2	2	2	2	2	2	2	2	1	6		3	3	2	2	2	2	1		6	2	2	2
678	1	1	1	2	11	2	3	1	1	7	2	3	4	2	3	3	2	2	2	2	2	2	2	2	2	2	2	2	2	2	2	2	2	2	1	6		2	1	3	2	2	2	1	10	6	2	2	2
507	1	1	1	5	10	3	3	1	1	6	2	3	4	1	3	3	2	2	2	2	2	2	2	2	2	2	2	2	2	2	2	2	2	2	1	6		1	2	2	2	2	2	2	10	6	2	2	2
170	1	3	1	1	36	4	4	2	2	8	2	3	4	1	2	3	2	2	2	2	2	2	2	2	2	2	2	2	2	2	2	2	2	2	1	6		1	2	2	2	2	2	2	10	6	2	2	2
556	1	1	1	5	10	4	4	2	2	10	3	2	3	1	3	3	2	2	2	2	2	2	2	2	2	2	2	2	2	2	2	2	2	2	1	6		2	1	2	3	2	2	1	10	6	2	2	2
438	2	3	1	5	10	4	4	2	2	2	1	4	5	2	1	3	2	2	2	2	2	2	2	2	2	2	2	2	2	2	2	2	2	2	1	6		3	3	2	2	2	2	1		6	2	2	2
463	1	3	1	5	10	4	4	2	2	6	2	1	1	1	1	3	2	2	2	2	2	2	2	2	2	2	2	2	2	2	2	2	2	2	1	6		3	3	3	2	2	2	1		6	2	2	2
870	1	1	1	5	10	4	4	2	2	6	2	3	4	2	2	3	2	2	2	2	2	2	2	2	2	2	2	2	2	2	2	2	2	2	1	6		1	2	2	2	2	2	2	10	5	1	1	2
1046	1	1	1	5	20	3	4	1	2	6	2	1	1	2	2	3	2	2	2	2	2	2	2	2	2	2	2	2	2	2	2	2	2	2	1	6		1	2	2	2	2	2	2	10	5	1	1	2
1406	1	2	1	2	49	4	4	2	2	8	2	2	3	1	3	3	2	2	2	2	2	2	2	2	2	2	2	2	2	2	2	2	2	2	1	6		1	2	2	2	2	2	2	10	5	1	1	2
356	1	1	1	5	7	3	4	1	2	9	3	3	4	1	3	3	2	2	2	2	2	2	2	2	2	2	2	2	2	2	2	2	2	2	1	6		1	2	2	2	2	2	2	10	5	1	1	2
445	2	1	1	5	10	3	3	1	1	11	3	3	4	1	3	3	2	2	2	2	2	2	2	2	2	2	2	2	2	2	2	2	2	2	1	6		2	1	2	2	2	2	1	9	5	1	1	2
572	2	1	1	5	10	1	3	1	1	2	1	3	4	2	5	3	2	2	2	2	2	2	2	2	2	2	2	2	2	2	2	2	2	2	1	6	7	1	2	2	1	2	2	1	9	5	1	1	2
597	1	1	1	4	7	3	4	1	2	10	3	3	4	1	4	3	2	2	2	2	2	2	2	2	2	2	2	2	2	2	2	2	2	2	1	6		3	3	2	3	3	2	1		5	1	1	2
984	1	1	1	5	30	4	3	2	1	5	1	4	5	2	5	3	2	2	2	2	2	2	2	2	2	2	2	2	2	2	2	2	2	2	1	6		1	2	2	2	2	2	2	10	5	1	2	2
1484	1	2	1	1	46	4	3	2	1	10	3	2	2	1	3	3	2	2	2	2	2	2	2	2	2	2	2	2	2	2	2	2	2	2	1	6		2	1	1	3	2	2	1	9	5	1	2	2
708	1	1	1	5	10	4	4	2	2	4	1	3	4	2	2	3	2	2	2	2	2	2	2	2	2	2	2	2	2	2	2	2	2	2	1	6		1	2	2	2	3	2	1	11	5	1	2	2
1008	1	1	1	1	48	4	4	2	2	5	1	3	4	1	2	3	2	2	2	2	2	2	2	2	2	2	2	2	2	2	2	2	2	2	1	6		1	2	2	2	3	2	1	11	5	1	2	2
842	1	1	1	3	51	4	4	2	2	2	1	2	2	2	2	3	2	2	2	2	2	2	2	2	2	2	2	2	2	2	2	2	2	2	1	6		1	2	3	3	2	2	1	12	5	1	2	2
435	1	1	1	4	11	4	4	2	2	7	2	1	1	1	2	3	2	2	2	2	2	2	2	2	2	2	2	2	2	2	2	2	2	2	1	6		3	3	2	2	2	2	1		5	1	2	2
409	1	1	1	5	10	4	4	2	2	4	1	2	2	1	3	3	2	2	2	2	2	2	2	2	2	2	2	2	2	2	2	2	2	2	1	6		3	3	2	2	2	2	1		5	1	2	2
492	2	1	1	5	10	3	3	1	1	4	1	3	4	1	2	3	2	2	2	2	2	2	2	2	2	2	2	2	2	2	2	2	2	2	1	6		3	3	2	2	2	2	1		5	1	2	2
912	2	1	1	5	10	4	4	2	2	11	3	3	4	2	2	3	2	2	2	2	2	2	2	2	2	2	2	2	2	2	2	2	2	2	1	6		3	3	3	2	2	3	1		5	1	2	2
1233	1	2	1	4	12	4	4	2	2	11	3	3	4	2	5	3	2	2	2	2	2	2	2	2	2	2	2	2	2	2	2	2	2	2	1	6		3	3	1	3	2	2	1		5	1	2	2
541	1	1	1	5	10	4	3	2	1	10	3	3	4	2	1	3	2	2	2	2	2	2	2	2	2	2	2	2	2	2	2	2	2	2	1	6		2	1	1	2	2	2	1	8	4	1	1	2
370	1	3	1	5	10	4	4	2	2	8	2	3	4	1	2	3	2	1	2	2	2	1	2	2	2	2	2	2	2	2	2	2	2	2	1	6		1	2	2	2	2	2	2	10	4	1	1	2
401	1	1	1	2	66	4	4	2	2	2	1	3	4	1	2	3	2	1	2	2	2	2	2	2	2	2	2	2	2	2	2	2	2	1	1	6	7	1	2	2	2	2	2	2	10	4	1	1	2
908	1	3	1	4	4	4	3	2	1	3	1	4	5	1	2	3	2	2	2	2	2	2	2	2	2	2	2	2	2	2	2	2	2	2	1	6		1	2	2	2	2	2	2	10	4	1	1	2
471	1	1	1	5	64	4	4	2	2	3	1	4	5	1	1	3	2	2	2	2	2	2	2	2	2	2	2	2	2	2	2	2	2	2	1	6		1	2	2	2	2	2	2	10	4	1	1	2
641	2	1	1	5	30	3	4	1	2	11	3	2	2	1	4	3	2	2	2	2	2	2	2	2	2	2	2	2	2	2	2	2	2	2	1	6		3	3	2	2	2	2	1		4	1	1	2
408	1	1	1	5	10	4	4	2	2	11	3	3	4	1	5	3	2	2	2	2	2	2	2	2	2	2	2	2	2	2	2	2	2	2	1	6		3	3	2	2	2	2	1		4	1	1	2
448	1	3	1	5	10	4	4	2	2	6	2	1	1	1	3	3	2	2	2	2	2	2	2	2	2	2	2	2	2	2	2	2	2	2	1	6		1	2	2	2	2	2	2	10	4	1	2	2
756	1	1	1	4		4	4	2	2	5	1	4	5	1	1	3	2	1	2	1	2	2	2	2	2	2	2	2	2	2	2	2	2	2	1	6		1	2	2	2	2	2	2	10	4	1	2	2
1201	1	2	1	3	5	4	4	2	2	4	1	3	4	1	1	3	2	2	2	2	2	2	2	2	2	2	2	2	2	2	2	2	2	2	1	6		1	2	2	2	2	2	2	10	4	1	2	2
84	2	1	1	4	4	3	3	1	1	11	3	3	4	1	3	3	2	1	2	2	2	2	2	2	2	2	2	2	2	2	2	2	2	1	1	6		3	3	2	2	2	2	1		3	1	1	2
578	1	1	1	5	10	4	3	2	1	2	1	1	1	2	2	3	2	1	2	2	2	2	2	2	2	2	2	2	2	2	2	2	2	1	1	6		3	3	2	2	2	2	1		3	1	1	2
1087	1	1	1	3	2	4	4	2	2	4	1	1	1	1	1	3	2	2	2	2	2	2	2	2	2	2	2	2	2	2	2	2	2	2	1	6		1	2	2	2	2	2	2	10	3	1	1	2
444	2	1	1	5	10	4	4	2	2	6	2	1	1	1	1	3	2	2	2	2	2	2	2	2	2	2	2	2	2	2	2	2	2	2	1	6		1	2	2	2	2	2	2	10	3	1	1	2
338	1	3	1	1	46	4	4	2	2	5	1	1	1	1	3	3	2	2	2	2	2	2	2	2	2	2	2	2	2	2	2	2	2	2	1	6		1	2	2	2	2	2	2	10	3	1	1	2
1162	1	2	1	5	10	4	4	2	2	10	3	1	1	1	2	3	2	1	2	2	2	2	2	2	2	2	2	2	2	1	2	2	2	2	1	6		1	2	2	2	2	2	2	10	3	1	1	2
1515	1	2	1	1	1	3	4	1	2	8	2	3	4	1	3	3	2	2	2	2	2	2	2	2	2	2	2	2	2	2	2	2	2	2	1	6		1	2	2	2	2	2	2	10	3	1	1	2
212	1	1	1	1	1	3	4	1	2	7	2	3	4	1	1	3	2	2	2	2	2	2	2	2	2	2	2	2	2	2	2	2	2	2	1	6		1	2	2	2	2	2	2	10	3	1	1	2
398	1	1	1	5	10	4	4	2	2	3	1	3	4	2	2	3	2	2	2	2	2	2	2	2	2	2	2	2	2	2	2	2	2	2	1	6		1	2	2	2	2	2	2	10	3	1	1	2
766	1	1	1	2		4	2	2	1	6	2	4	5	1	2	3	2	2	2	2	2	2	2	2	2	2	2	2	2	2	2	2	2	2	1	6		1	2	2	2	2	2	2	10	3	1	1	2
1080	2	1	1	3	51	4	4	2	2	2	1	1	1	2	2	3	2	2	2	2	2	2	2	2	2	2	2	2	2	2	2	2	2	2	1	6		1	2	2	2	3	3	1	12	3	1	1	2
1287	1	2	1	5	10	1	4	1	2	7	2	3	4	1	2	3	2	2	2	2	2	2	2	2	2	2	2	2	2	2	2	2	2	2	1	6		3	3	2	2	2	2	1		3	1	1	2
51	1	1	1	4	4	4	4	2	2	2	1	3	4	1	2	3	2	1	2	2	2	2	2	2	2	2	2	2	2	2	2	2	2	1	1	6		3	3	2	2	2	2	1		3	1	1	2
502	1	1	1	2	10	3	4	1	2	10	3	3	4	1	3	3	2	2	2	2	2	2	2	2	2	2	2	2	2	2	2	2	2	2	1	6		3	3	2	3	2	2	1		3	1	2	2
469	1	1	1	5	10	3	4	1	2	5	1	1	1	2	3	3	2	2	2	2	2	2	2	2	2	2	2	2	2	2	2	2	2	2	1	6		1	2	2	2	2	2	2	10	3	1	2	2
1262	1	2	1	5	24	3	4	1	2	7	2	2	3	1	2	3	2	2	2	2	2	2	2	2	2	2	2	2	2	2	2	2	2	2	1	6		1	2	2	2	2	2	2	10	3	1	2	2
667	1	1	1	5	10	3	3	1	1	4	1	3	4	1	2	3	2	2	2	2	2	2	2	2	2	2	2	2	2	2	2	2	2	2	1	6		1	2	2	2	2	2	2	10	3	1	2	2
577	2	1	1	5	10	2	3	1	1	4	1	4	5	2	1	3	2	2	2	2	2	2	2	2	2	2	2	2	2	2	2	2	2	2	1	6		1	2	2	2	2	2	2	10	3	1	2	2
365	1	1	1	5	10	4	4	2	2	4	1	4	5	1	2	3	2	1	1	2	2	2	2	2	2	2	2	2	2	2	2	2	2	2	1	6	7	1	2	2	2	2	2	2	10	3	1	2	2
988	2	3	1	2	45	3	4	1	2	5	1	4	5	2	1	3	2	2	2	2	2	2	2	2	2	2	2	2	2	2	2	2	2	2	1	6		1	2	2	2	2	2	2	10	3	1	2	2
782	1	1	1	4		4	3	2	1	11	3	1	1	1	2	3	2	2	2	2	2	2	2	2	2	2	2	2	2	2	2	2	2	2	1	6		2	1	1	1	2	2	1	7	3	1	2	2
17	2	1	1	4	4	3	3	1	1	11	3	3	4	1	3	3	2	1	2	2	2	2	2	2	2	2	2	2	2	2	2	2	2	1	1	6		3	3	2	2	2	2	1		3	1	2	2
1204	1	2	1	3	5	4	4	2	2	9	3	2	2	1	1	3	2	1	2	1	2	2	2	2	2	2	2	2	2	2	2	2	2	2	1	6		1	2	2	2	1	1	1	8	3	1	2	2
1293	1	2	1	2	49	3	3	1	1	5	1	3	4	2	3	3	2	2	2	2	2	2	2	2	2	2	2	2	2	2	2	2	2	2	1	6		1	2	2	2	2	2	2	10	3	1	2	2
1224	1	2	1	5	10	4	3	2	1	5	1	2	3	1	1	3	2	2	2	2	2	2	2	2	2	2	2	2	2	2	2	2	2	2	1	6		1	2	2	2	2	2	2	10	2	1	1	1
213	1	1	1	1	33	3	3	1	1	11	3	3	4	1	3	3	2	2	2	2	2	2	2	2	2	2	2	2	2	2	2	2	2	2	1	6		1	2	2	2	2	2	2	10	2	1	1	2
254	1	1	1	2	4	4	4	2	2	10	3	3	4	1	2	3	2	2	2	2	2	2	2	2	2	2	2	2	2	2	2	2	2	2	1	6		1	2	2	2	2	2	2	10	2	1	1	2
1379	1	2	1	3	2	3	4	1	2	4	1	2	3	2	3	3	2	2	2	2	2	2	2	2	2	2	2	2	2	2	2	2	2	2	1	6		1	2	2	2	2	2	2	10	2	1	1	2
257	1	1	1	2	4	4	4	2	2	10	3	3	4	1	2	3	2	2	2	2	2	2	2	2	2	2	2	2	2	2	2	2	2	2	1	6		1	2	2	2	2	2	2	10	2	1	1	2
805	1	1	1	4	4	4	4	2	2	3	1	4	5	2	1	3	2	2	2	2	2	2	2	2	2	2	2	2	2	2	2	2	2	2	1	6		3	3	2	2	2	2	1		2	1	1	2
423	1	1	1	5	10	4	4	2	2	2	1	1	1	2	1	3	2	2	2	2	2	2	2	2	2	2	2	2	2	2	2	2	2	2	1	6		1	2	2	2	2	2	2	10	2	1	1	2
304	1	1	1	1	52	4	4	2	2	6	2	1	1	2	2	3	2	2	2	2	2	2	2	2	2	2	2	2	2	2	2	2	2	2	1	6		1	2	2	2	2	2	2	10	2	1	1	2
1007	2	1	1	1	48	4	4	2	2	4	1	1	1	2	2	3	2	2	2	2	2	2	2	2	2	2	2	2	2	2	2	2	2	2	1	6		1	2	2	2	2	2	2	10	2	1	1	2
928	1	1	1	5	10	4	2	2	1	10	3	2	3	1	1	3	2	2	2	2	2	2	2	2	2	2	2	2	2	2	2	2	2	2	1	6		1	2	2	2	2	2	2	10	2	1	1	2
330	2	1	1	1	36	3	3	1	1	8	2	2	3	1	3	3	2	2	2	2	2	2	2	2	2	2	2	2	2	2	2	2	2	2	1	6		1	2	2	2	2	2	2	10	2	1	1	2
14	1	1	1	4	4	4	3	2	1	8	2	2	2	2	2	3	2	1	2	2	2	2	2	2	2	2	2	2	2	1	2	2	2	2	1	6		1	2	2	2	2	2	2	10	2	1	1	2
321	1	1	1	1	7	4	4	2	2	5	1	2	2	1	2	3	2	2	2	2	2	2	2	2	2	2	2	2	2	2	2	2	2	2	1	6	7	1	2	2	2	2	2	2	10	2	1	1	2
865	1	1	1	3	5	3	4	1	2	4	1	2	2	2	3	3	2	2	2	2	2	2	2	2	2	2	2	2	2	2	2	2	2	2	1	6		1	2	2	2	2	2	2	10	2	1	1	2
998	1	1	1	2	45	4	4	2	2	4	1	2	2	1	1	3	2	2	2	2	2	2	2	2	2	2	2	2	2	2	2	2	2	2	1	6		1	2	2	2	2	2	2	10	2	1	1	2
1263	1	2	1	5	24	4	4	2	2	2	1	2	3	2	2	3	2	2	2	2	2	2	2	2	2	2	2	2	2	2	2	2	2	2	1	6		1	2	2	2	2	2	2	10	2	1	1	2
255	1	1	1	4	4	4	4	2	2	3	1	2	3	2	3	3	2	1	2	1	2	2	2	2	2	2	2	2	2	2	2	2	2	2	1	6		1	2	2	2	2	2	2	10	2	1	1	2
1081	1	1	1	3	2	4	4	2	2	3	1	2	3	1	2	3	2	2	2	2	2	2	2	2	2	2	2	2	2	2	2	2	2	2	1	6		1	2	2	2	2	2	2	10	2	1	1	2
453	2	1	1	5	10	1	1	1	1	9	3	3	4	1	2	3	2	2	2	2	2	2	2	2	2	2	2	2	2	2	2	2	2	2	1	6		1	2	2	2	2	2	2	10	2	1	1	2
837	1	1	1	4	6	3	2	1	1	11	3	3	4	2	1	3	2	2	2	2	2	2	2	2	2	2	2	2	2	2	2	2	2	2	1	6		1	2	2	2	2	2	2	10	2	1	1	2
518	1	1	1	5	10	3	3	1	1	10	3	3	4	1	2	3	2	2	2	2	2	2	2	2	2	2	2	2	2	2	2	2	2	2	1	6		1	2	2	2	2	2	2	10	2	1	1	2
1150	1	2	1	2	49	2	3	1	1	8	2	3	4	1	1	3	2	2	2	2	2	2	2	2	2	2	2	2	2	2	2	2	2	2	1	6		1	2	2	2	2	2	2	10	2	1	1	2
730	2	1	1	5		4	4	2	2	11	3	3	4	1	2	3	2	2	2	2	2	2	2	2	2	2	2	2	2	2	2	2	2	2	1	6		1	2	2	2	2	2	2	10	2	1	1	2
410	1	1	1	4	6	4	4	2	2	11	3	3	4	2	3	3	2	2	2	2	2	2	2	2	2	2	2	2	2	2	2	2	2	2	1	6		1	2	2	2	2	2	2	10	2	1	1	2
946	2	1	1	5	10	4	4	2	2	5	1	3	4	2	1	3	2	2	2	2	2	2	2	2	2	2	2	2	2	2	2	2	2	2	1	6		1	2	2	2	2	2	2	10	2	1	1	2
531	2	1	1	5	10	3	4	1	2	11	3	3	4	1	1	3	2	2	2	2	2	2	2	2	2	2	2	2	2	2	2	2	2	2	1	6		1	2	2	2	2	2	2	10	2	1	1	2
793	1	1	1	5	10	4	4	2	2	5	1	3	4	2	3	3	2	2	2	2	2	2	2	2	2	2	2	2	2	2	2	2	2	2	1	6		1	2	2	2	2	2	2	10	2	1	1	2
197	1	1	1	3	5	4	4	2	2	3	1	3	4	2	2	3	2	2	2	2	2	2	2	2	2	2	2	2	2	2	2	2	2	2	1	6		1	2	2	2	2	2	2	10	2	1	1	2
516	1	1	1	5	20	2	3	1	1	11	3	2	3	2	2	3	2	2	2	2	2	2	2	2	2	2	2	2	2	2	2	2	2	2	1	6		2	1	1	1	2	2	1	7	2	1	1	2
1521	1	2	1	1	1	4	3	2	1	10	3	3	4	1	1	3	2	2	2	2	2	2	2	2	2	2	2	2	2	2	2	2	2	2	1	6		2	1	1	1	3	3	1	9	2	1	1	2
1101	1	1	1	1	1	4	3	2	1	7	2	3	4	2	2	3	2	1	2	2	2	1	2	2	2	2	2	2	2	2	2	2	2	2	1	6		2	1	3	2	2	2	1	10	2	1	1	2
7	1	3	1	4	4	3	3	1	1	11	3	3	4	1	2	3	2	1	2	2	2	2	2	2	2	2	2	2	2	2	2	2	2	1	1	6		1	2	2	2	2	3	1	11	2	1	1	2
761	1	3	1	4		2	1	1	1	9	3	3	4	2	1	3	2	2	2	2	2	2	2	2	2	2	2	2	2	2	2	2	2	2	1	6		3	3	2	2	2	2	1		2	1	1	2
944	2	3	1	5	10	2	4	1	2	2	1	3	4	2	3	3	2	1	2	2	2	2	2	2	2	2	2	2	2	2	2	2	1	2	1	6		3	3	2	2	2	2	1		2	1	1	2
489	1	1	1	5	10	4	4	2	2	5	1	3	4	2	3	3	2	2	2	2	2	2	2	2	2	2	2	2	2	2	2	2	2	2	1	6		3	3	2	2	2	2	1		2	1	1	2
1508	1	2	1	5	10	4	4	2	2	9	3	3	4	1	2	3	2	2	2	2	2	2	2	2	2	2	2	2	2	2	2	2	2	2	1	6		3	3	2	2	3	3	1		2	1	1	2
6	1	3	1	4	4	3	2	1	1	7	2	2	3	1	3	3	2	1	2	2	2	2	2	2	2	2	2	2	2	2	2	2	2	1	1	6	2	1	2	2	2	1	2	1	9	2	1	1	2
532	2	1	1	5	47	4	4	2	2	2	1	3	4	1	2	3	2	2	2	2	2	2	2	2	2	2	2	2	2	2	2	2	2	2	1	6		1	2	2	2	2	2	2	10	2	1	2	1
697	1	1	1	4	6	4	4	2	2	11	3	2	2	2	2	3	2	2	2	2	2	2	2	2	2	2	2	2	2	2	2	2	2	2	1	6		1	2	2	2	2	2	2	10	2	1	2	1
326	1	1	1	1	36	4	3	2	1	5	1	3	4	2	1	3	2	2	2	2	2	2	2	2	2	2	2	2	2	2	2	2	2	2	1	6		1	2	2	2	2	2	2	10	2	1	2	1
1026	2	1	1	1	13	3	2	1	1	10	3	3	4	1	3	3	2	2	2	2	2	2	2	2	2	2	2	2	2	2	2	2	2	2	1	6		1	2	3	2	2	2	1	11	2	1	2	1
161	1	1	1	4	4	4	3	2	1	7	2	1	1	1	1	3	2	2	2	2	2	2	2	2	2	2	2	2	2	2	2	2	2	2	1	6		1	2	2	2	2	2	2	10	2	1	2	2
1089	1	1	1	3	2	3	4	1	2	9	3	2	3	2	3	3	2	2	2	2	2	2	2	2	2	2	2	2	2	2	2	2	2	2	1	6		3	3	2	2	2	2	1		2	1	2	2
669	1	1	1	1	31	2	4	1	2	6	2	2	3	2	2	3	2	2	2	2	2	2	2	2	2	2	2	2	2	2	2	2	2	2	1	6		1	2	2	2	2	2	2	10	2	1	2	2
990	1	1	1	3		1	2	1	1	11	3	3	4	2	3	3	2	2	2	2	2	2	2	2	2	2	2	2	2	2	2	2	2	2	1	6		1	2	2	2	2	2	2	10	2	1	2	2
827	2	1	1	3	10	4	4	2	2	2	1	4	5	1	2	3	2	2	2	2	2	2	2	2	2	2	2	2	2	2	2	2	2	2	1	6		1	2	3	2	2	2	1	11	2	1	2	2
779	1	1	1	4		4	4	2	2	10	3	1	1	2	3	3	2	2	2	2	2	2	2	2	2	2	2	2	2	2	2	2	2	2	1	6		1	2	2	2	2	2	2	10	2	1	2	2
49	1	1	1	4	6	3	4	1	2	11	3	1	1	2	1	3	2	1	2	2	2	2	2	2	2	2	2	2	2	2	2	2	2	1	1	6		1	2	2	2	2	2	2	10	2	1	2	2
288	1	1	1	1	7	4	4	2	2	5	1	2	2	1	2	3	2	2	2	2	2	2	2	2	2	2	2	2	2	2	2	2	2	2	1	6	7	1	2	2	2	2	2	2	10	2	1	2	2
783	2	1	1	3		2	2	1	1	9	3	3	4	2	3	3	2	2	2	2	2	2	2	2	2	2	2	2	2	2	2	2	2	2	1	6		1	2	2	2	2	2	2	10	2	1	2	2
527	1	1	1	5	10	2	3	1	1	8	2	3	4	1	2	3	2	2	2	2	2	2	2	2	2	2	2	2	2	2	2	2	2	2	1	6		1	2	2	2	2	2	2	10	2	1	2	2
925	2	1	1	1	1	2	3	1	1	9	3	3	4	2	3	3	2	2	2	2	2	2	2	2	2	2	2	2	2	2	2	2	2	2	1	6		1	2	2	2	2	2	2	10	2	1	2	2
259	1	1	1	2	4	4	4	2	2	10	3	3	4	1	2	3	2	2	2	2	2	2	2	2	2	2	2	2	2	2	2	2	2	2	1	6		1	2	2	2	2	2	2	10	2	1	2	2
713	1	1	1	5		4	4	2	2	9	3	3	4	2	3	3	2	2	2	2	2	2	2	2	2	2	2	2	2	2	2	2	2	2	1	6		1	2	2	2	2	2	2	10	2	1	2	2
1460	1	2	1	1	2	4	4	2	2	3	1	3	4	1	1	3	2	2	2	2	2	2	2	2	2	2	2	2	2	2	2	2	2	2	1	6		1	2	2	2	2	2	2	10	2	1	2	2
731	1	1	1	4		3	4	1	2	6	2	3	4	2	1	3	2	2	2	2	2	2	2	2	2	2	2	2	2	2	2	2	2	2	1	6		1	2	2	2	2	2	2	10	2	1	2	2
142	1	1	1	3	5	4	4	2	2	3	1	3	4	2	2	3	2	2	2	2	2	2	2	2	2	2	2	2	2	2	2	2	2	2	1	6		1	2	2	2	2	2	2	10	2	1	2	2
1371	1	4	2	5	20	2	2	1	1	3	1	4	5	2	1	3	2	1	2	2	2	2	2	2	2	2	2	2	2	2	2	2	2	1	1	6	7	1	2	2	2	2	2	2	10	2	1	2	2
367	1	1	1	4	4	4	3	2	1	4	1	4	5	2	1	3	2	2	2	2	2	2	2	2	2	2	2	2	2	2	2	2	2	2	1	6		1	2	2	2	2	2	2	10	2	1	2	2
241	1	1	1	1	4	2	3	1	1	4	1	3	4	1	4	3	2	2	2	2	2	2	2	2	2	2	2	2	2	2	2	2	2	2	1	6		2	1	2	1	1	1	1	6	2	1	2	2
186	1	1	1	1	1	4	4	2	2	11	3	2	3	2	1	3	2	2	2	2	2	2	2	2	2	2	2	2	2	2	2	2	2	2	1	6		1	2	1	2	2	2	1	9	2	1	2	2
752	1	1	1	5		4	3	2	1	2	1	4	5	2	1	3	2	2	2	2	2	2	2	2	2	2	2	2	2	2	2	2	2	2	1	6		1	2	2	2	1	1	1	8	2	1	2	2
772	1	1	1	5		4	4	2	2	10	3	4	5	2	2	3	2	2	2	2	2	2	2	2	2	2	2	2	2	2	2	2	2	2	1	6		3	3	2	2	1	2	1		2	1	2	2
649	1	1	1	5	10	2	4	1	2	5	1	2	2	1	2	3	2	2	2	2	2	2	2	2	2	2	2	2	2	2	2	2	2	2	1	6		3	3	2	2	2	2	1		2	1	2	2
1021	1	1	1	1	1	4	4	2	2	8	2	3	4	2	2	3	2	2	2	2	2	2	2	2	2	2	2	2	2	2	2	2	2	2	1	6		3	3	2	3	2	2	1		2	1	2	2
721	2	1	1	4		4	3	2	1	11	3	2	3	1	3	3	2	2	2	2	2	2	2	2	2	2	2	2	2	2	2	2	2	2	1	6		3	3	3	3	2	3	1		2	1	2	2
778	1	1	1	3		4	4	2	2	2	1	2	2	2	2	3	2	2	2	2	2	2	2	2	2	2	2	2	2	2	2	2	2	2	1	6		1	2	2	2	2	2	2	10	2	1	2	2
613	1	1	1	5	10	4	3	2	1	7	2	3	4	2	2	3	2	2	2	2	2	2	2	2	2	2	2	2	2	2	2	2	2	2	1	6	7	1	2	2	2	2	2	2	10	2	1	2	2
774	2	1	1	2		2	3	1	1	4	1	2	2	2	3	3	2	1	2	2	2	2	2	2	2	2	2	2	2	2	2	2	2	1	1	6	7	1	2	3	2	3	2	1	12	2	1	2	2
1342	1	2	1	5	10	4	4	2	2	3	1	2	2	1	2	3	2	2	2	2	2	2	2	2	2	2	2	2	2	2	2	2	2	2	1	6		1	2	2	2	2	2	2	10	2	1	2	2
1326	1	2	1	3	5	2	3	1	1	11	3	3	4	2	2	3	2	2	2	2	2	2	2	2	2	2	2	2	2	2	2	2	2	2	1	6		1	2	2	2	2	2	2	10	2	1	2	2
1179	1	2	1	4	6	4	4	2	2	10	3	3	4	2	3	3	2	2	2	2	2	2	2	2	2	2	2	2	2	2	2	2	2	2	1	6		1	2	2	2	2	2	2	10	2	1	2	2
1298	1	2	1	5	10	2	2	1	1	7	2	1	1	1	3	3	2	2	2	2	2	2	2	2	2	2	2	2	2	2	2	2	2	2	1	6		2	1	1	3	2	2	1	9	2	1	2	2
1357	1	2	1	5	10	3	4	1	2	4	1	2	3	2	2	3	2	2	2	2	2	2	2	2	2	2	2	2	2	2	2	2	2	2	1	6		1	2	2	2	2	2	2	10	1	1	1	1
274	1	1	1	5	10	4	4	2	2	9	3	2	3	2	1	3	2	2	2	2	2	2	2	2	2	2	2	2	2	2	2	2	2	2	1	6		1	2	2	2	2	2	2	10	1	1	1	2
802	2	1	1	1	15	4	4	2	2	2	1	4	5	1	1	3	2	2	2	2	2	2	2	2	2	2	2	2	2	2	2	2	2	2	1	6		1	2	2	2	2	2	2	10	1	1	1	2
1358	1	2	1	5	10	3	4	1	2	4	1	2	3	2	3	3	2	2	2	2	2	2	2	2	2	2	2	2	2	2	2	2	2	2	1	6		1	2	2	2	2	2	2	10	1	1	1	2
744	1	1	1	1		4	4	2	2	11	3	1	1	2	2	3	2	2	2	2	2	2	2	2	2	2	2	2	2	2	2	2	2	2	1	6		1	2	2	2	2	2	2	10	1	1	1	2
749	1	1	1	5		4	4	2	2	10	3	2	2	1	2	3	2	2	2	2	2	2	2	2	2	2	2	2	2	2	2	2	2	2	1	6		1	2	2	2	2	2	2	10	1	1	1	2
120	1	1	1	4	4	4	4	2	2	9	3	2	3	2	1	3	2	2	2	2	2	2	2	2	2	2	2	2	2	2	2	2	2	2	1	6		1	2	2	2	2	2	2	10	1	1	1	2
1195	1	2	1	4	4	4	4	2	2	4	1	3	4	2	3	3	2	1	2	2	2	2	2	2	2	1	2	2	2	2	1	2	2	2	1	6		1	2	2	2	2	2	2	10	1	1	1	2
1313	1	2	1	5	10	4	4	2	2	6	2	3	4	2	2	3	2	2	2	2	2	2	2	2	2	2	2	2	2	2	2	2	2	2	1	6		1	2	2	2	2	2	2	10	1	1	1	2
80	1	1	1	4	4	4	4	2	2	8	2	3	4	2	1	3	2	1	1	2	2	2	2	2	2	2	2	2	2	2	2	2	2	2	1	6		2	1	2	2	2	2	1	9	1	1	1	2
788	1	1	1	4		2	2	1	1	2	1	1	1	1	1	3	2	1	2	2	2	2	2	2	2	2	2	2	2	2	2	2	2	1	1	6	7	1	2	1	2	2	2	1	9	1	1	1	2
1182	1	2	1	3	2	3	4	1	2	7	2	3	4	1	3	3	2	2	2	2	2	2	2	2	2	2	2	2	2	2	2	2	2	2	1	6		3	3	2	2	2	2	1		1	1	1	2
626	1	1	1	3	19	4	3	2	1	10	3	4	5	1	1	3	2	2	2	2	2	2	2	2	2	2	2	2	2	2	2	2	2	2	1	6		1	2	2	2	2	2	2	10	1	1	2	1
261	1	1	1	4	4	4	4	2	2	8	2	2	3	1	1	3	2	2	2	2	2	2	2	2	2	2	2	2	2	2	2	2	2	2	1	6		1	2	2	2	2	2	2	10	1	1	2	1
166	1	3	1	1	36	4	4	2	2	11	3	3	4	2	3	3	2	2	2	2	2	2	2	2	2	2	2	2	2	2	2	2	2	2	1	6		1	2	2	2	2	2	2	10	1	1	2	1
159	1	1	1	1	63	3	4	1	2	11	3	1	1	2	2	3	2	2	2	2	2	2	2	2	2	2	2	2	2	2	2	2	2	2	1	6		1	2	2	2	2	2	2	10	1	1	2	2
747	1	1	1	4		4	3	2	1	9	3	2	2	2	1	3	2	2	2	2	2	2	2	2	2	2	2	2	2	2	2	2	2	2	1	6		1	2	2	2	2	2	2	10	1	1	2	2
480	1	1	1	5	10	4	4	2	2	9	3	1	1	1	2	3	2	1	2	1	2	2	2	2	2	2	2	2	2	2	2	2	2	2	1	6		1	2	2	2	2	2	2	10	1	1	2	2
530	1	3	1	3	10	2	2	1	1	11	3	2	3	1	1	3	2	2	2	2	2	2	2	2	2	2	2	2	2	2	2	2	2	2	1	6		1	2	2	2	2	2	2	10	1	1	2	2
1100	1	1	1	3	5	3	4	1	2	10	3	2	2	1	2	3	2	2	2	2	2	2	2	2	2	2	2	2	2	2	2	2	2	2	1	6		1	2	2	2	2	2	2	10	1	1	2	2
222	1	1	1	4	4	4	4	2	2	9	3	2	3	2	1	3	2	2	2	2	2	2	2	2	2	2	2	2	2	2	2	2	2	2	1	6		1	2	2	2	2	2	2	10	1	1	2	2
183	2	1	1	1	36	1	4	1	2	10	3	2	3	2	2	3	2	2	2	2	2	2	2	2	2	2	2	2	2	2	2	2	2	2	1	6		1	2	2	2	2	2	2	10	1	1	2	2
594	2	1	1	5	7	3	3	1	1	3	1	3	4	2	1	3	2	2	2	2	2	2	2	2	2	2	2	2	2	2	2	2	2	2	1	6		1	2	2	2	2	2	2	10	1	1	2	2
770	1	3	1	4		4	2	2	1	3	1	4	5	2	1	3	2	2	2	2	2	2	2	2	2	2	2	2	2	2	2	2	2	2	1	6		1	2	2	2	2	2	2	10	1	1	2	2
685	1	1	1	1	52	2	3	1	1	11	3	3	4	1	2	3	2	2	2	2	2	2	2	2	2	2	2	2	2	2	2	2	2	2	1	6		1	2	2	3	2	2	1	11	1	1	2	2
1203	1	2	1	1	4	3	4	1	2	10	3	3	4	1	2	3	2	2	2	2	2	2	2	2	2	2	2	2	2	2	2	2	2	2	1	6		1	2	3	2	3	2	1	12	1	1	2	2
736	2	1	1	5		4	3	2	1	2	1	4	5	1	1	3	2	1	2	2	2	2	2	2	2	2	2	2	2	2	2	2	2	1	1	6	7	1	2	1	1	3	3	1	10	1	1	2	2
554	1	1	1	5	10	3	3	1	1	9	3	3	4	1	2	3	2	2	2	2	2	2	2	2	2	2	2	2	2	2	2	2	2	2	1	6		3	3	2	2	2	2	1		1	1	2	2
1220	1	2	1	4	4	4	4	2	2	5	1	2	2	2	1	3	2	2	2	2	2	2	2	2	2	2	2	2	2	2	2	2	2	2	1	6		1	2	2	2	2	2	2	10	1	1	2	2
1317	1	2	1	5	10	4	4	2	2	11	3	3	4	1	3	2	1	1	2	2	1	2	1	2	2	1	2	2	2	2	2	2	2	2	1	6		1	2	2	2	2	2	2	10	6	2	1	2
670	1	1	1	1	1	2	4	1	2	10	3	3	4	2	4	2	1	1	2	1	2	2	2	2	2	2	2	2	1	2	2	2	2	2	1	6		2	1	1	2	3	3	1	10	6	2	1	2
573	2	1	1	1	48	2	2	1	1	7	2	3	4	1	3	2	1	1	2	2	1	2	2	2	2	2	2	2	2	2	2	2	2	2	1	6		3	3	3	3	3	3	1		6	2	1	2
1010	1	1	1	2	49	2	2	1	1	10	3	3	4	1	4	2	1	1	2	1	2	2	2	2	2	2	2	2	2	2	2	2	2	2	1	6		2	1	3	1	2	2	1	9	6	2	2	2
1294	1	2	1	5	10	2	2	1	1	6	2	2	2	1	4	2	1	1	2	2	2	2	2	2	2	2	2	2	2	2	2	2	2	1	1	6		2	1	1	1	1	2	1	6	6	2	2	2
848	1	3	1	5	10	4	4	2	2	10	3	3	4	1	3	2	1	1	2	2	2	2	2	2	2	2	2	2	2	2	2	2	2	1	1	6		2	1	2	2	3	3	1	11	6	2	2	2
157	1	1	1	1	36	4	4	2	2	4	1	3	4	2	3	2	1	1	2	2	2	2	2	2	2	2	2	2	2	2	2	2	2	1	1	6		2	1	2	2	3	3	1	11	6	2	2	2
552	1	1	1	2	10	4	4	2	2	6	2	3	4	2	4	2	1	1	2	2	1	1	2	2	2	1	2	2	1	2	2	2	2	2	1	6	2	3	3	2	3	1	3	1		6	2	2	2
521	2	1	1	5	10	4	3	2	1	10	3	2	2	2	5	2	1	1	2	1	1	2	2	2	2	2	2	2	2	2	2	2	2	2	1	6		3	3	2	3	2	2	1		6	2	2	2
559	2	1	1	5	10	4	3	2	1	8	2	3	4	1	4	2	1	1	2	2	1	2	2	2	2	2	2	2	2	2	2	2	2	2	1	6		2	1	3	1	1	3	1	9	6	2	2	2
126	1	3	1	1	52	3	4	1	2	7	2	3	4	2	3	2	1	1	2	2	2	2	1	2	2	2	2	2	2	2	1	2	2	1	1	6		2	1	1	2	1	1	1	6	5	1	1	2
962	1	1	1	2	45	3	4	1	2	6	2	3	4	2	2	2	1	1	2	2	1	2	2	2	2	2	2	2	2	2	2	2	2	2	1	6		1	2	1	2	2	2	1	9	5	1	1	2
1466	1	2	1	1	52	4	3	2	1	5	1	4	5	2	5	2	1	1	2	2	2	2	2	2	2	2	2	2	2	2	2	2	2	1	1	6		3	3	2	3	1	2	1		5	1	1	2
898	1	1	1	5	10	1	2	1	1	11	3	3	4	2	4	2	1	1	1	2	2	2	2	2	2	2	2	2	2	2	2	2	2	2	1	6		3	3	3	2	2	2	1		5	1	1	2
576	2	1	1	5	10	4	4	2	2	10	3	2	2	1	4	2	1	1	2	2	2	2	2	2	2	2	2	2	2	2	2	2	2	1	1	6	1	2	1	2	2	2	2	1	9	5	1	2	2
961	1	1	1	2	45	3	4	1	2	8	2	2	3	2	3	2	1	1	2	2	2	2	2	2	2	2	2	2	2	2	2	2	2	1	1	6	2	2	1	1	1	2	2	1	7	5	1	2	2
707	1	1	1	1	1	4	4	2	2	11	3	3	4	1	4	2	1	1	2	1	1	2	2	2	2	2	2	2	2	2	2	2	2	2	1	6		3	3	1	3	3	3	1		5	1	2	2
857	2	3	1	4	11	4	4	2	2	5	1	3	4	2	3	2	1	1	1	2	2	2	2	2	2	2	2	2	1	2	2	2	2	2	1	6		3	3	2	2	1	1	1		5	1	2	2
416	1	1	1	1	48	4	4	2	2	3	1	2	2	2	3	2	1	1	1	2	1	2	2	2	2	2	2	2	2	1	1	2	2	2	1	6		3	3	2	2	3	3	1		5	1	2	2
987	2	1	1	5	10	3	2	1	1	4	1	3	4	2	3	2	1	1	2	2	2	1	2	2	2	1	2	2	2	2	2	2	2	2	1	6		3	3	3	3	3	3	1		5	1	2	2
722	1	1	1	4		4	4	2	2	9	3	2	3	2	2	2	1	1	1	1	1	1	1	1	2	1	2	1	1	2	2	2	2	2	1	6		2	1	1	1	3	3	1	9	5	1	2	2
917	1	1	1	5	10	4	3	2	1	9	3	3	4	2	5	2	1	1	2	1	1	2	2	2	2	2	2	2	2	2	2	2	2	2	1	6		2	1	2	2	2	2	1	9	4	1	1	1
1488	1	2	1	1	1	4	4	2	2	8	2	2	3	2	3	2	1	1	2	1	2	2	2	2	2	2	2	2	2	2	2	2	2	2	1	6		1	2	2	2	2	2	2	10	4	1	1	2
130	1	1	1	4	4	4	4	2	2	4	1	3	4	1	3	2	1	1	2	2	2	1	2	2	2	2	2	2	2	2	2	2	2	2	1	6		1	2	2	2	2	2	2	10	4	1	1	2
341	1	1	1	4	6	1	2	1	1	11	3	3	4	2	4	2	1	2	2	2	2	2	2	2	2	2	2	2	2	2	2	2	2	2	1	6		2	1	1	2	3	3	1	10	4	1	1	2
4	1	1	1	4		4	2	2	1	11	3	3	4	1	3	2	1	1	1	2	2	2	2	2	2	2	2	2	2	2	2	2	2	2	1	6		2	1	2	2	2	2	1	9	4	1	1	2
823	1	3	1	3	51	4	3	2	1	2	1	3	4	1	3	2	1	1	2	1	1	2	2	2	2	1	2	2	2	2	2	2	2	2	1	6	2	3	3	3	1	1	1	1		4	1	1	2
547	1	1	1	5	10	3	3	1	1	8	2	1	1	2	3	2	1	1	2	2	2	2	2	2	2	2	2	2	2	2	1	2	2	2	1	6		1	2	2	2	2	2	2	10	4	1	2	2
470	1	1	1	5	40	4	4	2	2	6	2	1	1	2	3	2	1	1	1	2	2	2	2	2	2	2	2	2	2	2	2	2	2	2	1	6		1	2	2	2	2	2	2	10	4	1	2	2
759	1	1	1	2		4	4	2	2	4	1	1	1	2	3	2	1	1	2	2	2	2	2	2	2	2	2	2	2	2	2	2	2	1	1	6		2	1	2	2	2	2	1	9	4	1	2	2
449	1	1	1	5	10	4	3	2	1	11	3	3	4	1	2	2	1	1	1	2	1	2	2	2	2	2	2	2	2	2	2	2	2	2	1	6		2	1	2	2	2	2	1	9	4	1	2	2
755	1	1	1	5		4	3	2	1	6	2	1	1	2	3	2	1	1	1	2	2	2	2	2	2	1	2	2	2	2	1	2	2	2	1	6		2	1	3	3	2	3	1	12	4	1	2	2
115	1	1	1	4	4	4	3	2	1	11	3	3	4	1	5	2	1	1	1	2	2	2	2	2	2	2	2	2	2	2	2	2	2	2	1	6		3	3	1	2	2	2	1		4	1	2	2
1417	1	2	1	2	49	4	4	2	2	7	2	1	1	1	3	2	1	1	1	2	2	2	2	2	2	2	2	2	2	2	2	2	2	2	1	6		1	2	2	2	2	2	2	10	4	1	2	2
563	1	3	1	4	11	4	3	2	1	5	1	1	1	2	2	2	1	1	2	2	2	2	2	2	2	2	2	2	2	2	1	2	2	2	1	6		1	2	2	2	2	2	2	10	3	1	1	2
800	1	1	1	5	10	4	4	2	2	6	2	1	1	2	2	2	1	1	2	2	2	2	2	2	2	2	2	2	2	2	1	2	2	2	1	6		1	2	2	2	2	2	2	10	3	1	1	2
300	1	1	1	4	4	4	4	2	2	5	1	2	2	1	4	2	1	1	2	1	1	2	2	2	2	2	2	2	2	2	1	2	2	2	1	6		1	2	2	2	2	2	2	10	3	1	1	2
657	1	1	1	5	10	2	2	1	1	11	3	3	4	1	4	2	1	1	2	1	1	2	2	2	2	2	2	2	2	2	2	2	2	2	1	6		1	2	2	2	2	2	2	10	3	1	1	2
677	1	1	1	5	10	2	3	1	1	11	3	3	4	1	4	2	1	1	2	2	1	2	2	2	2	2	2	2	1	2	2	2	2	2	1	6		2	1	1	1	1	1	1	5	3	1	1	2
369	1	1	1	1	46	4	4	2	2	11	3	2	3	1	4	2	1	1	2	2	2	1	1	2	2	2	2	2	2	2	2	2	2	2	1	6		3	3	2	2	3	1	1		3	1	1	2
784	2	1	1	4		4	4	2	2	6	2	3	4	2	3	2	1	1	2	2	2	2	2	2	2	2	2	2	2	2	2	2	2	1	1	6		2	1	1	2	2	2	1	8	3	1	2	1
50	1	1	1	3	19	4	3	2	1	9	3	1	1	2	3	2	1	2	2	2	2	2	2	2	2	2	2	2	2	2	2	2	2	2	1	6	1	3	3	2	2	3	3	1		3	1	2	2
1292	1	2	1	4	4	2	3	1	1	11	3	3	4	2	4	2	1	1	2	1	1	2	2	2	2	2	2	2	2	2	2	2	2	2	1	6		3	3	3	2	2	2	1		3	1	2	2
334	1	1	1	1	65	4	4	2	2	11	3	3	4	1	3	2	1	1	2	2	1	2	2	2	2	2	2	2	2	2	2	2	2	2	1	6		1	2	2	2	2	2	2	10	3	1	2	2
769	1	1	1	4		4	3	2	1	7	2	3	4	2	3	2	1	1	2	2	2	2	2	2	2	2	2	2	2	1	2	2	2	1	1	6		1	2	2	2	2	2	2	10	3	1	2	2
787	1	1	1	2		3	3	1	1	11	3	4	5	2	3	2	1	1	2	1	2	2	2	2	2	2	2	2	2	2	1	2	2	2	1	6		2	1	1	3	2	2	1	9	3	1	2	2
715	1	1	1	1		4	4	2	2	10	3	3	4	2	3	2	1	1	2	1	1	1	2	2	2	2	2	2	2	2	2	2	1	2	1	6		2	1	2	1	2	2	1	8	3	1	2	2
1422	1	2	1	4	4	4	4	2	2	11	3	3	4	1	3	2	1	1	2	1	2	2	2	2	2	2	2	2	2	2	2	2	2	2	1	6		2	1	2	2	2	2	1	9	3	1	2	2
97	1	1	1	3	19	4	3	2	1	9	3	1	1	2	3	2	1	2	2	2	2	2	2	2	2	2	2	2	2	2	2	2	2	2	1	6	1	3	3	2	2	3	3	1		3	1	2	2
100	1	1	1	3	19	4	3	2	1	9	3	1	1	2	3	2	1	2	2	2	2	2	2	2	2	2	2	2	2	2	2	2	2	2	1	6	1	3	3	2	2	3	3	1		3	1	2	2
1151	1	2	1	5	10	3	3	1	1	9	3	3	4	1	5	2	1	1	2	2	1	2	2	2	2	1	2	2	2	2	2	2	2	2	1	6	1	1	2	2	2	2	2	2	10	2	1	1	2
964	1	1	1	2	45	4	4	2	2	10	3	1	1	1	3	2	1	1	1	2	2	2	2	2	2	2	2	2	2	2	2	2	2	2	1	6		1	2	2	2	2	2	2	10	2	1	1	2
200	1	1	1	4	7	4	3	2	1	8	2	2	3	1	2	2	1	1	2	1	1	2	2	2	1	2	2	2	2	2	2	2	2	2	1	6		1	2	2	2	2	2	2	10	2	1	1	2
927	1	1	1	1	8	2	3	1	1	8	2	3	4	2	2	2	1	1	2	2	1	2	2	2	2	2	2	2	2	2	2	2	2	2	1	6		1	2	2	2	2	2	2	10	2	1	1	2
992	1	1	1	2	45	2	3	1	1	10	3	3	4	2	3	2	1	1	1	2	2	1	2	1	2	1	2	2	1	2	2	2	2	2	1	6		1	2	2	2	2	2	2	10	2	1	1	2
1065	2	1	1	2	17	2	4	1	2	11	3	3	4	2	3	2	1	1	2	2	1	2	2	2	2	2	2	2	2	2	2	2	2	2	1	6	2	1	2	2	2	2	2	2	10	2	1	1	2
1017	1	1	1	5	30	4	3	2	1	11	3	3	4	1	3	2	1	1	1	1	2	2	2	2	2	2	2	2	2	2	2	2	2	1	1	6		3	3	2	2	2	2	1		2	1	1	2
999	1	1	1	2	49	4	4	2	2	11	3	3	4	2	1	2	1	1	1	1	2	2	2	2	2	1	1	2	2	2	2	2	2	2	1	6	1	1	2	2	2	2	2	2	10	2	1	2	1
611	1	1	1	5	40	2	2	1	1	7	2	2	3	1	2	2	1	1	2	1	1	2	2	2	2	2	2	1	2	2	2	2	2	2	1	6		1	2	2	2	2	2	2	10	2	1	2	2
839	1	1	1	1	7	1	3	1	1	9	3	3	4	2	3	2	1	1	2	2	1	2	2	2	2	2	2	2	2	2	2	2	2	2	1	6		1	2	2	2	2	2	2	10	2	1	2	2
1316	1	2	1	4	4	3	4	1	2	11	3	3	4	1	3	2	1	1	2	1	1	2	2	2	2	2	2	2	2	2	2	2	2	2	1	6		1	2	2	2	2	2	2	10	2	1	2	2
921	1	1	1	5	10	4	4	2	2	11	3	3	4	1	2	2	1	1	1	2	2	1	2	2	2	2	2	2	2	2	2	2	2	2	1	6		1	2	2	2	2	2	2	10	2	1	2	2
1001	1	1	1	2	49	2	2	1	1	8	2	3	4	2	4	2	1	1	1	1	1	2	2	2	2	2	2	2	2	2	2	2	2	2	1	6		2	1	1	1	1	1	1	5	2	1	2	2
702	1	1	1	5	41	4	2	2	1	2	1	4	5	1	3	2	1	1	2	2	2	2	2	2	2	2	2	2	2	2	1	2	2	2	1	6		1	2	1	2	1	1	1	7	2	1	2	2
647	1	1	1	4	4	4	4	2	2	6	2	1	1	1	2	2	1	1	1	2	1	2	2	2	2	2	2	2	2	2	1	2	2	2	1	6		1	2	2	2	1	1	1	8	2	1	2	2
1475	1	2	1	1	1	4	4	2	2	2	1	3	4	2	3	2	1	1	2	1	2	2	2	2	2	2	2	2	2	2	2	2	2	2	1	6		3	3	2	2	3	3	1		2	1	2	2
462	1	1	1	1	8	1	1	1	1	7	2	3	4	1	3	2	1	1	2	2	2	1	2	2	2	2	2	2	2	2	2	2	2	2	1	6		2	1	3	3	3	3	1	13	2	1	2	2
1506	1	2	1	5	20	3	3	1	1	6	2	2	2	1	4	2	1	1	2	2	1	2	2	2	2	2	2	2	2	2	1	2	2	2	1	6		3	3	2	2	2	2	1		2	1	2	2
78	1	1	1	1	4	4	4	2	2	11	3	3	4	1	3	2	1	1	2	1	1	2	2	2	2	2	2	2	2	2	2	2	2	2	1	6		2	1	2	2	2	2	1	9	1	1	1	2
122	1	3	1	4	4	2	4	1	2	6	2	3	4	2	2	2	1	1	2	2	2	2	2	2	2	1	2	2	2	2	2	2	2	2	1	6		1	2	2	2	2	2	2	10	1	1	1	2
1207	1	2	1	3	19	4	4	2	2	10	3	2	2	1	3	2	1	1	2	2	1	2	2	1	2	1	2	2	2	2	2	2	2	2	1	6		3	3	2	2	2	2	1		1	1	2	2
833	1	1	1	5	20	3	4	1	2	9	3	3	4	2	3	2	1	1	1	1	1	1	1	2	2	2	2	2	2	2	2	2	2	2	1	6	1	2	1	3	2	3	3	1	12	1	1	2	2
699	1	1	1	5	10	1	2	1	1	8	2	3	4	2	4	2	1	1	2	2	2	2	2	2	2	2	2	2	2	2	2	2	2	1	1	6		2	1	3	3	2	2	1	11	1	1	2	2
525	2	1	1	5	10	4	4	2	2	5	1	3	4	2	4	2	1	1	1	1	1	2	2	2	2	2	2	2	1	2	2	2	2	2	1	6	7	1	2	2	3	2	1	1	10	1	1	2	2
224	1	3	1	1	1	3	3	1	1	6	2	3	4	2	3	2	2	1	2	2	2	2	2	2	2	2	2	2	2	2	2	1	2	2	1	6	7	3	3	3	2	1	1	1		6	2	1	2
158	1	1	1	1	52	4	3	2	1	2	1	4	5	1	1	2	2	2	2	2	2	2	2	2	2	2	2	2	2	2	2	2	2	2	1	6		3	3	3	2	1	2	1		6	2	1	2
680	2	1	1	4	6	2	1	1	1	11	3	3	4	1	1	2	2	2	2	2	2	2	2	2	2	2	2	2	2	2	2	2	2	2	1	6		3	3	3	3	2	2	1		6	2	1	2
883	2	1	1	5	6	2	2	1	1	2	1	4	5	2	3	2	2	1	2	2	2	2	2	2	2	2	2	2	2	2	2	2	2	1	1	6	2	1	2	2	2	1	1	1	8	6	2	2	1
791	1	1	1	3		2	3	1	1	10	3	3	4	2	3	2	2	1	2	2	2	2	2	2	2	1	2	2	2	2	2	2	2	2	1	6	1	1	2	2	2	2	2	2	10	6	2	2	2
1470	1	2	1	1	52	4	3	2	1	10	3	2	2	1	3	2	2	2	2	2	2	2	2	2	2	2	2	2	2	2	2	2	2	2	1	6		1	2	2	2	2	2	2	10	5	1	2	2
830	1	1	1	5	10	4	4	2	2	9	3	2	3	1	3	2	2	2	2	2	2	2	2	2	2	2	2	2	2	2	2	2	2	2	1	6		1	2	2	2	2	2	2	10	5	1	2	2
1253	1	2	1	5	10	3	4	1	2	9	3	2	2	2	3	2	2	2	2	2	2	2	2	2	2	2	2	2	2	2	2	2	2	2	1	6		3	3	2	2	2	2	1		5	1	2	2
1085	1	1	1	3	2	2	4	1	2	6	2	1	1	2	2	2	2	2	2	2	2	2	2	2	2	2	2	2	2	2	2	2	2	2	1	6		1	2	2	2	2	2	2	10	4	1	1	2
277	2	1	1	1	46	4	2	2	1	9	3	3	4	2	2	2	2	2	2	2	2	2	2	2	2	2	2	2	2	2	2	2	2	2	1	6		1	2	2	2	2	2	2	10	4	1	1	2
1042	1	3	1	5	72	2	2	1	1	7	2	3	4	2	3	2	2	2	2	2	2	2	2	2	2	2	2	2	2	2	2	2	2	2	1	6		2	1	2	2	2	2	1	9	4	1	1	2
650	1	1	1	1	1	4	4	2	2	2	1	4	5	2	3	2	2	2	2	2	2	2	2	2	2	2	2	2	2	2	2	2	2	2	1	6		3	3	3	3	2	2	1		4	1	1	2
1517	1	2	1	1	46	4	4	2	2	4	1	2	3	1	3	2	2	2	2	2	2	2	2	2	2	2	2	2	2	2	2	2	2	2	1	6		1	2	2	2	2	2	2	10	4	1	1	2
1214	1	2	1	1	63	3	4	1	2	6	2	3	4	2	3	2	2	2	2	2	2	2	2	2	2	2	2	2	2	2	2	2	2	2	1	6		3	3	2	2	2	2	1		4	1	2	1
306	1	1	1	1	46	4	3	2	1	8	2	2	2	2	3	2	2	1	2	2	1	2	2	1	2	2	2	2	2	2	2	2	2	2	1	6		1	2	2	2	2	2	2	10	4	1	2	2
845	1	1	1	3	14	3	2	1	1	11	3	3	4	2	3	2	2	2	2	2	2	2	2	2	2	2	2	2	2	2	2	2	2	2	1	6		1	2	2	2	2	2	2	10	4	1	2	2
362	1	1	1	5	10	4	4	2	2	2	1	2	3	1	2	2	2	2	2	2	2	2	2	2	2	2	2	2	2	2	2	2	2	2	1	6		1	2	2	2	3	2	1	11	3	1	1	2
698	1	1	1	1	1	4	4	2	2	5	1	2	2	1	4	2	2	2	2	2	2	2	2	2	2	2	2	2	2	2	2	2	2	2	1	6		2	1	2	3	1	1	1	8	3	1	2	2
146	1	3	1	1	36	4	3	2	1	8	2	1	1	1	2	2	2	2	2	2	2	2	2	2	2	2	2	2	2	2	2	2	2	2	1	6		1	2	2	2	2	2	2	10	3	1	2	2
853	1	1	1	5	10	3	3	1	1	11	3	3	4	2	2	2	2	2	2	2	2	2	2	2	2	2	2	2	2	2	2	2	2	2	1	6		1	2	2	2	2	2	2	10	3	1	2	2
957	1	1	1	2		3	4	1	2	2	1	4	5	2	1	2	2	2	2	2	2	2	2	2	2	2	2	2	2	2	2	2	2	2	1	6		1	2	2	2	2	2	2	10	3	1	2	2
1076	1	1	1	3	2	4	4	2	2	8	2	2	2	1	3	2	2	2	2	2	2	2	2	2	2	2	2	2	2	2	2	2	2	2	1	6		2	1	2	2	2	2	1	9	3	1	2	2
1288	1	2	1	4	7	3	2	1	1	8	2	3	4	1	3	2	2	2	2	2	2	2	2	2	2	2	2	2	2	2	2	2	2	2	1	6		1	2	2	2	1	1	1	8	3	1	2	2
1079	1	1	1	3	5	4	4	2	2	8	2	2	2	2	3	2	2	2	2	2	2	2	2	2	2	2	2	2	2	2	2	2	2	2	1	6		1	2	3	2	1	3	1	11	3	1	2	2
192	1	1	1	1	46	4	4	2	2	3	1	3	4	2	3	2	2	2	2	2	2	2	2	2	2	2	2	2	2	2	2	2	2	2	1	6		1	2	3	2	2	2	1	11	3	1	2	2
495	1	1	1	5	10	3	2	1	1	8	2	3	4	1	1	2	2	2	2	2	2	2	2	2	2	2	2	2	2	2	2	2	2	2	1	6		3	3	2	3	2	2	1		3	1	2	2
1362	1	2	1	5	10	2	2	1	1	10	3	3	4	1	3	2	2	2	2	2	2	2	2	2	2	2	2	2	2	2	2	2	2	2	1	6		1	2	3	2	2	2	1	11	2	1	1	1
318	1	1	1	5	10	4	4	2	2	5	1	4	5	1	3	2	2	2	2	2	2	2	2	2	2	2	2	2	2	2	2	2	2	2	1	6		1	2	2	2	1	3	1	10	2	1	1	2
260	1	1	2	2	4	4	4	2	2	10	3	3	4	1	3	2	2	2	2	2	2	2	2	2	2	2	2	2	2	2	2	2	2	2	1	6		1	2	2	2	2	2	2	10	2	1	1	2
1481	1	2	1	1	1	3	4	1	2	5	1	4	5	1	2	2	2	2	2	2	2	2	2	2	2	2	2	2	2	2	2	2	2	2	1	6		1	2	2	2	2	2	2	10	2	1	1	2
897	1	1	1	1	60	3	4	1	2	10	3	3	4	2	3	2	2	2	2	2	2	2	2	2	2	2	2	2	2	2	2	2	2	2	1	6		1	2	2	2	2	2	2	10	2	1	1	2
954	1	1	1	5	20	4	3	2	1	10	3	2	3	2	2	2	2	1	2	2	1	2	2	2	2	2	2	2	2	2	2	2	2	2	1	6	7	1	2	2	2	2	3	1	11	2	1	1	2
74	2	1	1	4	7	3	3	1	1	5	1	2	2	1	3	2	2	1	2	2	2	2	2	2	2	2	2	2	2	2	1	2	2	2	1	6		3	3	2	2	2	2	1		2	1	1	2
869	1	1	1	5	10	3	4	1	2	8	2	2	3	2	3	2	2	2	2	2	2	2	2	2	2	2	2	2	2	2	2	2	2	2	1	6		3	3	2	3	2	2	1		2	1	1	2
420	1	1	1	3	2	4	4	2	2	2	1	1	1	2	1	2	2	2	2	2	2	2	2	2	2	2	2	2	2	2	2	2	2	2	1	6		1	2	2	2	2	2	2	10	2	1	2	2
351	1	3	1	1	46	4	2	2	1	11	3	3	4	1	2	2	2	2	2	2	2	2	2	2	2	2	2	2	2	2	2	2	2	2	1	6		1	2	2	2	2	2	2	10	2	1	2	2
575	2	1	1	4	11	2	3	1	1	10	3	3	4	1	3	2	2	2	2	2	2	2	2	2	2	2	2	2	2	2	2	2	2	2	1	6		1	2	2	2	2	2	2	10	2	1	2	2
314	1	1	1	5	10	4	4	2	2	8	2	3	4	2	2	2	2	2	2	2	2	2	2	2	2	2	2	2	2	2	2	2	2	2	1	6		1	2	2	2	2	2	2	10	2	1	2	2
252	1	1	2	2	4	4	4	2	2	10	3	3	4	1	3	2	2	2	2	2	2	2	2	2	2	2	2	2	2	2	2	2	2	2	1	6		1	2	2	2	2	2	2	10	2	1	2	2
187	2	1	1	1	52	1	1	1	1	2	1	3	4	2	4	2	2	1	2	2	2	1	2	2	2	2	2	2	2	2	2	2	2	2	1	6		2	1	1	3	1	1	1	7	2	1	2	2
44	2	1	1	4	4	2	2	1	1	2	1	4	5	1	3	2	2	1	2	2	1	2	2	2	2	2	2	2	2	2	2	2	2	2	1	6		3	3	2	2	2	2	1		2	1	2	2
1074	1	1	1	3	3	4	4	2	2	2	1	3	4	2	3	2	2	2	2	2	2	2	2	2	2	2	2	2	2	2	2	2	2	2	1	6		3	3	3	3	3	3	1		2	1	2	2
664	1	1	1	5	10	2	2	1	1	5	1	3	4	2	3	2	2	2	2	2	2	2	2	2	2	2	2	2	2	2	2	2	2	2	1	6		1	2	2	2	2	2	2	10	2	1	2	2
1318	1	2	1	2	42	4	4	2	2	11	3	3	4	1	3	2	2	2	2	2	2	2	2	2	2	2	2	2	2	2	2	2	2	2	1	6		1	2	2	2	2	2	2	10	2	1	2	2
1421	1	2	1	2	49	4	4	2	2	5	1	3	4	2	1	2	2	2	2	2	2	2	2	2	2	2	2	2	2	2	2	2	2	2	1	6		1	2	2	2	2	2	2	10	2	1	2	2
1397	1	2	1	5	4	4	3	2	1	7	2	3	4	2	2	2	2	2	2	2	2	2	2	2	2	2	2	2	2	2	2	2	2	2	1	6		2	1	2	2	2	2	1	9	2	1	2	2
201	1	1	1	4	4	3	3	1	1	8	2	2	2	2	3	2	2	2	2	2	2	2	2	2	2	2	2	2	2	2	2	2	2	2	1	6		1	2	2	2	1	1	1	8	1	1	1	2
232	2	1	1	4	4	4	3	2	1	2	1	4	5	2	2	2	2	2	2	2	2	2	2	2	2	2	2	2	2	2	2	2	2	2	1	6		3	3	2	2	2	2	1		1	1	1	2
493	2	1	1	5	10	2	1	1	1	11	3	3	4	2	5	2	2	1	2	2	2	2	2	2	2	2	2	2	2	2	2	2	2	1	1	6	7	3	3	2	2	2	2	1		1	1	2	2
1276	1	4	1	4	4	4	3	2	1	10	3	2	3	2	2	2	2	2	2	2	2	2	2	2	2	2	2	2	2	2	2	2	2	2	1	6		1	2	2	2	2	2	2	10	1	1	2	2
568	1	1	1	4	6	3	2	1	1	7	2	3	4	1	3	2	2	2	2	2	2	2	2	2	2	2	2	2	2	2	2	2	2	2	1	6		1	2	2	2	2	2	2	10	1	1	2	2
535	1	1	1	5	10	4	2	2	1	9	3	1	1	2	1	2	2	1	2	2	2	2	2	2	2	2	2	2	2	2	1	2	2	2	1	6	2	2	1	2	2	2	2	1	9	1	1	2	2
901	1	1	1	4	4	4	4	2	2	7	2	2	3	2	3	2	2	2	2	2	2	2	2	2	2	2	2	2	2	2	2	2	2	2	1	6		1	2	2	2	1	2	1	9	1	1	2	2
332	1	1	1	4		4	4	2	2	4	1	3	4	2	3	1	1	1	1	2	2	2	2	2	2	2	2	2	2	2	2	2	2	2	1	6		2	1	2	2	1	1	1	7	6	2	1	1
494	2	1	1	5	10	4	4	2	2	9	3	3	4	2	4	1	1	1	2	2	1	2	2	2	2	2	2	2	2	2	2	2	2	2	1	6		3	3	1	1	1	1	1		6	2	1	2
1066	1	1	1	3	2	2	4	1	2	2	1	1	1	2	2	1	1	1	2	2	2	2	2	2	2	2	2	2	2	2	1	2	2	2	1	6		3	3	2	3	1	1	1		6	2	1	2
733	1	1	1	4		2	4	1	2	9	3	3	4	1	4	1	1	1	2	1	1	2	2	2	2	1	2	2	2	2	2	2	2	2	1	6	1	2	1	1	1	1	1	1	5	6	2	2	1
497	2	1	1	2	3	4	4	2	2	11	3	3	4	2	5	1	1	1	1	2	1	1	2	2	1	1	1	2	1	1	1	1	1	1	1	6	1	3	3	1	1	1	1	1		6	2	2	2
1490	1	2	1	1	46	4	3	2	1	8	2	2	3	1	3	1	1	1	1	1	1	2	2	2	2	1	2	2	2	2	2	2	2	2	1	6		1	2	2	2	2	2	2	10	4	1	2	2
26	1	1	1	4	4	4	4	2	2	7	2	3	4	1	4	1	1	1	1	2	2	2	2	2	2	2	2	2	1	2	2	2	2	2	1	6		2	1	2	2	1	1	1	7	2	1	1	2
89	1	1	1	5	4	3	4	1	2	11	3	1	1	2	4	1	1	1	2	1	2	1	2	2	2	1	2	2	2	2	2	2	2	2	1	6		2	1	1	3	2	2	1	9	2	1	2	2
856	1	1	1	4	7	4	4	2	2	4	1	2	3	1	4	1	1	1	2	1	1	2	2	2	2	2	2	2	2	2	2	2	2	2	1	6		2	1	1	2	3	3	1	10	2	1	2	2
1324	1	2	1	5	7	3	4	1	2	11	3	2	3	2	4	1	1	1	1	2	1	2	2	2	2	2	2	2	1	2	2	2	2	2	1	6		1	2	2	2	2	1	1	9	2	1	2	2
724	2	1	1	4		3	3	1	1	11	3	3	4	2	4	1	1	1	2	2	1	2	2	2	2	2	2	2	2	2	2	2	2	2	1	6		2	1	2	2	2	2	1	9	1	1	1	2
347	1	1	1	1	46	4	4	2	2	10	3	2	2	1	4	1	2	2	2	2	2	2	2	2	2	2	2	2	2	2	2	2	2	2	1	6		3	3	2	2	3	3	1		6	2	2	2
9	1	1	1	1	4	4	3	2	1	8	2	4	5	1	1	1	2	1	2	2	2	2	2	2	2	2	2	2	2	2	2	2	2	1	1	6	7	2	1	2	2	2	2	1	9	5	1	2	2
683	1	3	1	5	10	4	3	2	1	8	2	2	3	1	4	1	2	1	2	2	2	2	2	2	2	1	2	2	2	2	2	2	2	2	1	6		2	1	2	2	2	2	1	9	2	1	2	2
312	1	1	1	5	10	4	4	2	2	11	3	3	4	1	1	1	2	2	2	2	2	2	2	2	2	2	2	2	2	2	2	2	2	2	1	6	7	1	2	1	2	2	2	1	9	1	1	1	2
[truncated: 9 more columns]
